# Supplementary material for: Soluble HLA peptidome of pleural effusions is a valuable source for tumor antigens
Source: PubMed Central journal article supplement — J Immunother Cancer. 2022 May 17;10(5):e003733. doi: 10.1136/jitc-2021-003733 (PMC9114951; doi:10.1136/jitc-2021-003733), 2022-05-17
Supplement: jitc-2021-003733supp001.pdf [file jitc-2021-003733supp001.pdf]

**Mapping the soluble human leukocyte antigen peptidome of pleural effusions reveals lung and tumor-associated antigens**

Sofia Khazan-Kost, Gal Cafri, Dganit Melamed Kadosh, Navit Mooshayef, Sumit Chatterji, Dan Dominissini, , Sigal Manor, Bracha Zisser, Limor Broday, Efrosiniia Talalai, Anat Shemer, Oranit Zadok, Efrat Ofek, Amir Onn, Arie Admon, and Michael Peled

**Supplemental Material**

## Supplementary Tables

Supplementary Table S7. CTA-deriving peptides identified in the pleural HLA peptidomes

| Gene name | Score* | Peptide     | Patients | Typing     | Min rank** |
|-----------|--------|-------------|----------|------------|------------|
| HDGFL1    | 3      | AEAERAAEA   | P1       | HLA-B50:01 | 0.0176     |
|           |        |             | P2       | HLA-B41:01 | 0.1064     |
| TDRD5     | 2      | VLRTEGHAI   | P1       | HLA-C12:03 | 2.4599     |
| TDRD1     | 4      | MEQYCSIKI   | P2       | HLA-B41:01 | 0.6405     |
|           |        | YGNFEILSLMR | P3       | HLA-A33:01 | 5.9686     |
| TOPAZ1    | 1      | QTVECLQSL   | P2       | HLA-A26:01 | 1.0153     |
| SAGE1     | 4      | APDNVLLTL   | P3       | HLA-B53:01 | 0.1094     |
|           |        |             | P9       | HLA-B35:02 | 0.0338     |
|           |        |             | P11      | HLA-B38:01 | 0.4833     |
|           |        |             | P13      | HLA-B35:02 | 0.0338     |
|           |        | STRDLHSTV   | P11      | HLA-C12:03 | 0.3482     |
| SPATA16   | 2      | KIRADKIEK   | P3       | HLA-A03:01 | 0.1145     |
| RBMXL2    | 3      | KVAQATKP    | P3       | HLA-A03:01 | 38         |
|           |        |             | P4       | HLA-A11:01 | 44.4       |
| DNAH17    | 1      | SLADLEAF    | P3       | HLA-C04:01 | 4.607      |
|           |        | VLYLKPLRI   | P4       | HLA-C04:01 | 0.6036     |
|           |        | EWKDGLFSTI  | P9       | HLA-A23:01 | 1.5053     |
|           |        | SPSTSIFFI   | P13      | HLA-B35:02 | 0.3594     |
| C1orf94   | 2      | SSSALVAKGP  | P3       | HLA-A03:01 | 70.625     |
|           |        |             | P4       | HLA-A11:01 | 61.1111    |
|           |        |             | P11      | HLA-A26:01 | 76.4286    |
| RIMBP3    | 2      | TAGSTLLEF   | P3       | HLA-B53:01 | 0.3784     |
| ADIG      | 2      | DILQVRRYRYD | P4       | HLA-B44:02 | 76.6667    |
|           |        |             | P6       | HLA-A33:01 | 6.6001     |
| TSKS      | 1      | LLDRALTSL   | P4       | HLA-C05:01 | 0.0312     |
|           |        |             | P14      | HLA-C08:02 | 0.0305     |
| DNAH8     | 2      | VEIWLLDLL   | P4       | HLA-B40:01 | 0.1702     |
|           |        | YTFESAKKVC  | P14      | HLA-C08:02 | 19.5437    |
| FAM186B   | 1      | AELSLVPAP   | P5       | HLA-B39:01 | 21.3796    |
| MS4A6E    | 1      | LSLMLVSTV   | P5       | HLA-A02:01 | 8.1356     |
| CNBD1     | 1      | LKTIPDLTF   | P8       | HLA-C07:01 | 2.7206     |
|           |        |             | P12      | HLA-C07:01 | 2.7206     |
|           |        |             | P13      | HLA-C06:02 | 2.9534     |
| GJA8      | 1      | LSVASVSLFL  | P8       | HLA-B58:01 | 4.4833     |
|           |        | LSRGYQETL   | P11      | HLA-C12:03 | 0.5468     |
| C1orf167  | 1      | SEAICWQLL   | P9       | HLA-B49:01 | 0.8435     |
| DPPA2     | 5      | VEVITSAPGA  | P10      | HLA-B18:01 | 10.3617    |

|        |   |             |     |            |         |
|--------|---|-------------|-----|------------|---------|
| FAM71D | 1 | APFVSPML    | P11 | HLA-C12:03 | 1.4251  |
| SMIM23 | 1 | DEKQTLLAL   | P11 | HLA-B49:01 | 0.8556  |
| PAPPA  | 1 | EVIASYNQL   | P11 | HLA-A26:01 | 0.0533  |
|        |   | SHDLGLHVL   | P11 | HLA-B38:01 | 0.0045  |
| ACRBP  | 2 | EYERFFALL   | P11 | HLA-A23:01 | 0.4514  |
|        |   |             | P13 | HLA-C04:01 | 0.2937  |
| IQCA1L | 1 | VYREEEESL   | P11 | HLA-A23:01 | 0.5211  |
| KCNU1  | 1 | LDKDKVYGVA  | P13 | HLA-A01:01 | 34.3571 |
| RBM44  | 1 | LDLTGEMKNVE | P13 | HLA-B57:01 | 83.4375 |
| XAGE1A | 2 | MPEAGEEQPV  | P13 | HLA-B35:02 | 2.4477  |
| ACSBG2 | 2 | PIGELYGL    | P13 | HLA-B35:02 | 2.0659  |
| ACRV1  | 2 | PSGEHLSGE   | P13 | HLA-B57:01 | 63.125  |
| DMRT1  | 4 | SSFTVTPVI   | P13 | HLA-B57:01 | 0.6472  |
| PRAME  | 5 | VLDGLDVLL   | P13 | HLA-C04:01 | 0.1152  |
| CCDC70 | 1 | ALLEGKAL    | P14 | HLA-C08:02 | 0.7197  |
| TCP11  | 2 | PSLLNHTTK   | P14 | HLA-A11:01 | 2.9328  |

\* Score refers to the number of sources [CTDatabase (<http://www.cta.lncc.br/index.php>); Wang et al., 2016; da Silva et al. 2017; Djureinovic et al. 2016; Bruggeman et al. 2018; Qi et al. 2021] the gene was identified as cancer/testis antigen (CTA).

\*\* Peptides were scored NetMHCpan 4.1 (<http://www.cbs.dtu.dk/services/NetMHCpan/>) according to their match to the patient's HLA alleles motif. Rank <2 represented increased the probability that the peptide was HLA ligand.

**Supplementary Table S10. Number and percent of identified soluble and membranal peptides per HLA allele.**

| Patient | Allele     | mHLA* |     | sHLA* |     |
|---------|------------|-------|-----|-------|-----|
|         |            | No.   | %** | No.   | %** |
| P1      | HLA-A26:01 | 86    | 27  | 203   | 15  |
| P1      | HLA-B38:01 | 81    | 26  | 371   | 27  |
| P1      | HLA-A68:01 | 68    | 22  | 360   | 26  |
| P1      | HLA-B50:01 | 39    | 12  | 206   | 15  |
| P1      | HLA-C12:03 | 33    | 10  | 221   | 16  |
| P1      | HLA-C06:02 | 8     | 3   | 24    | 2   |
| P2      | HLA-A26:01 | 503   | 19  | 366   | 14  |
| P2      | HLA-B38:01 | 764   | 28  | 825   | 31  |
| P2      | HLA-B41:01 | 595   | 22  | 469   | 17  |
| P2      | HLA-A01:01 | 468   | 17  | 682   | 25  |
| P2      | HLA-C12:03 | 297   | 11  | 315   | 12  |
| P2      | HLA-C17:01 | 63    | 2   | 47    | 2   |
| P3      | HLA-B18:01 | 1421  | 35  | 974   | 26  |
| P3      | HLA-A03:01 | 1412  | 35  | 1161  | 31  |
| P3      | HLA-A33:01 | 520   | 13  | 831   | 22  |
| P3      | HLA-B53:01 | 272   | 7   | 534   | 14  |
| P3      | HLA-C05:01 | 265   | 7   | 146   | 4   |
| P3      | HLA-C04:01 | 164   | 4   | 154   | 4   |
| P4      | HLA-B40:01 | 1379  | 40  | 239   | 21  |
| P4      | HLA-A11:01 | 651   | 19  | 394   | 35  |
| P4      | HLA-B44:02 | 518   | 15  | 200   | 18  |
| P4      | HLA-A02:01 | 376   | 11  | 87    | 8   |
| P4      | HLA-C03:04 | 315   | 9   | 166   | 15  |
| P4      | HLA-C05:01 | 201   | 6   | 32    | 3   |
| P5      | HLA-A02:01 | 490   | 49  | 151   | 33  |
| P5      | HLA-B39:01 | 330   | 33  | 235   | 51  |
| P5      | HLA-B08:01 | 129   | 13  | 68    | 15  |
| P5      | HLA-C07:02 | 41    | 4   | 4     | 1   |
| P6      | HLA-A02:05 | 33    | 27  | 84    | 14  |
| P6      | HLA-B18:01 | 27    | 22  | 122   | 20  |
| P6      | HLA-C12:03 | 25    | 20  | 149   | 25  |
| P6      | HLA-A33:01 | 16    | 13  | 134   | 22  |
| P6      | HLA-B50:01 | 14    | 11  | 91    | 15  |
| P6      | HLA-C06:02 | 7     | 6   | 24    | 4   |
| P8      | HLA-A01:01 | 1037  | 67  | 674   | 64  |
| P8      | HLA-B58:01 | 470   | 30  | 366   | 35  |
| P8      | HLA-C07:01 | 45    | 3   | 19    | 2   |

|     |            |      |    |      |    |
|-----|------------|------|----|------|----|
| P9  | HLA-B49:01 | 1066 | 35 | 296  | 25 |
| P9  | HLA-B35:02 | 805  | 27 | 360  | 30 |
| P9  | HLA-A23:01 | 470  | 16 | 329  | 27 |
| P9  | HLA-A31:01 | 344  | 11 | 106  | 9  |
| P9  | HLA-C04:01 | 283  | 9  | 103  | 9  |
| P9  | HLA-C07:01 | 44   | 1  | 5    | 0  |
| P10 | HLA-B18:01 | 456  | 59 | 899  | 64 |
| P10 | HLA-A25:01 | 178  | 23 | 210  | 15 |
| P10 | HLA-A32:01 | 61   | 8  | 166  | 12 |
| P10 | HLA-C12:03 | 55   | 7  | 90   | 6  |
| P10 | HLA-C04:01 | 29   | 4  | 42   | 3  |
| P11 | HLA-B49:01 | 1834 | 34 | 1573 | 31 |
| P11 | HLA-B38:01 | 1287 | 24 | 1076 | 21 |
| P11 | HLA-A23:01 | 984  | 18 | 1570 | 31 |
| P11 | HLA-A26:01 | 859  | 16 | 389  | 8  |
| P11 | HLA-C12:03 | 422  | 8  | 449  | 9  |
| P11 | HLA-C07:01 | 67   | 1  | 47   | 1  |
| P12 | HLA-B49:01 | 385  | 35 | 442  | 31 |
| P12 | HLA-A01:01 | 363  | 33 | 534  | 38 |
| P12 | HLA-B15:17 | 217  | 20 | 245  | 17 |
| P12 | HLA-A32:01 | 124  | 11 | 174  | 12 |
| P12 | HLA-C07:01 | 16   | 1  | 14   | 1  |
| P13 | HLA-B35:02 | 1956 | 44 | 1706 | 38 |
| P13 | HLA-A24:02 | 1112 | 25 | 1309 | 29 |
| P13 | HLA-A01:01 | 525  | 12 | 592  | 13 |
| P13 | HLA-B57:01 | 394  | 9  | 504  | 11 |
| P13 | HLA-C04:01 | 366  | 8  | 234  | 5  |
| P13 | HLA-C06:02 | 139  | 3  | 175  | 4  |
| P14 | HLA-B35:01 | 1217 | 33 | 1920 | 42 |
| P14 | HLA-A11:01 | 1060 | 28 | 1026 | 22 |
| P14 | HLA-A03:01 | 590  | 16 | 569  | 12 |
| P14 | HLA-B14:02 | 386  | 10 | 326  | 7  |
| P14 | HLA-C08:02 | 263  | 7  | 285  | 6  |
| P14 | HLA-C04:01 | 210  | 6  | 474  | 10 |

\* Membranal HLA (mHLA); soluble HLA (sHLA)

\*\* Percent was calculated from the total number of identified peptides in each patient's soluble or membranal HLA peptidome.

## Supplementary Figures

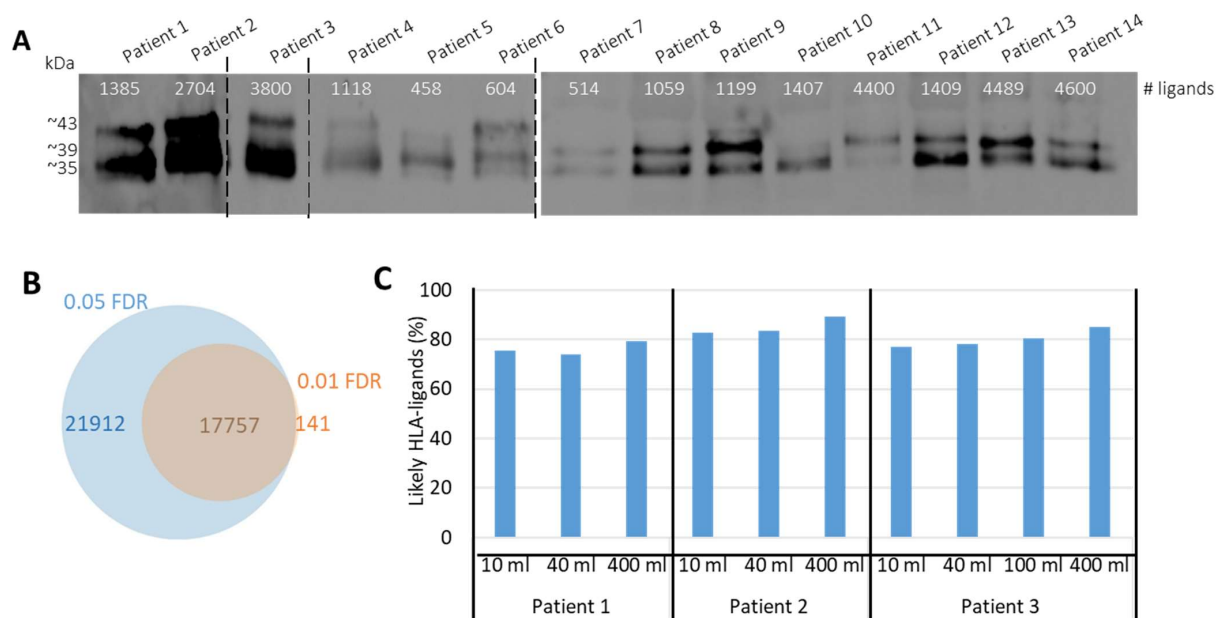

**Supplementary Figure S1. Quality control and calibration of the HLA-peptide complexes immunoaffinity purification process.** **A)** Western blot analyses of HLA molecules purified from 400 ml pleural effusions of Patients 1-14. The detection was with the anti-pan-HLA antibody (ab126237, Abcam, Cambridge, UK). Different western blots are separated by dotted lines. The number of likely-HLA ligands are indicated in white above the bands. **B)** Comparison of the total number of identified HLA ligands identified by a using 0.01 or 0.05 FDR. Database search was performed with MaxQuant (version 1.6.10.43). The list of identified peptides was filtered to retain only peptides with the length of 8-14 aa that fit the consensus sequence motifs of the HLA allotypes of each patient, and to remove known contaminants. **C)** Percentage of likely HLA ligands from different volumes of pleural effusions from Patients 1-3.

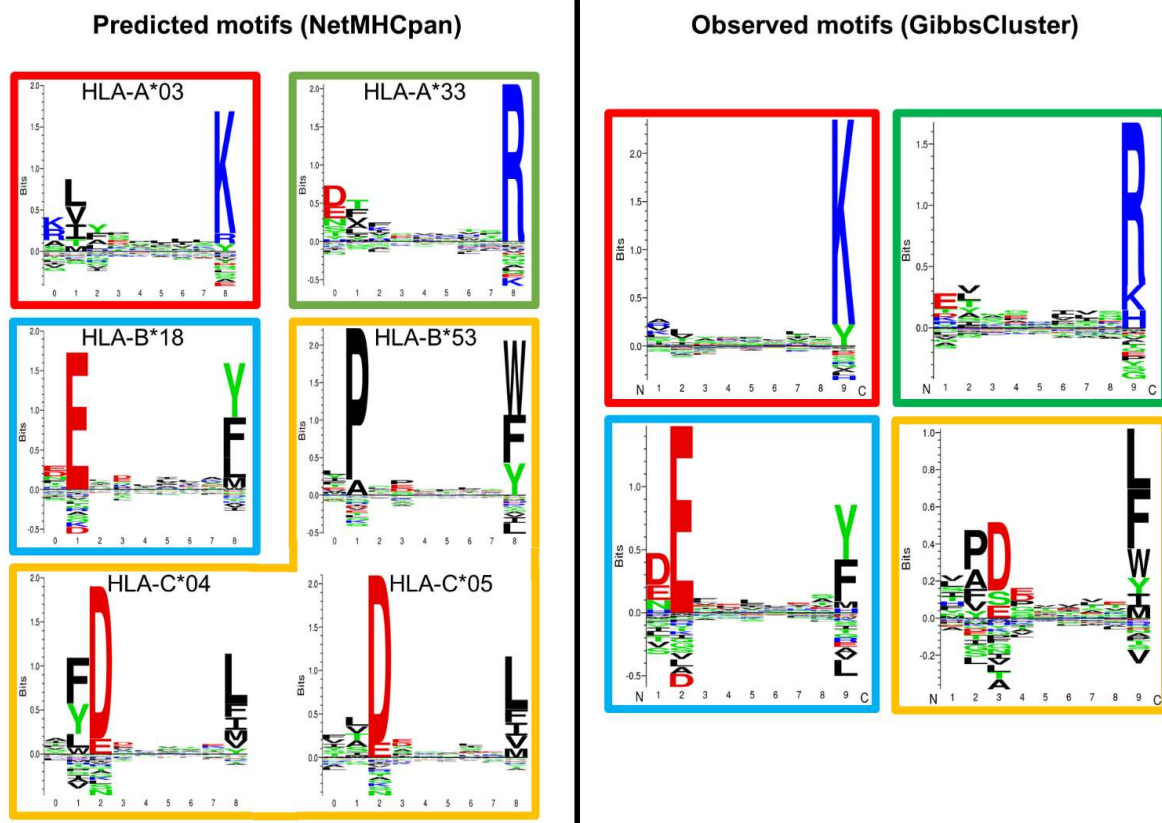

**Supplementary Figure S2. Predicted vs. observed HLA peptide sequence motifs of Patient 3.** The known HLA motifs were retrieved from NetMHCpan 4.0 (left). The observed motifs were obtained by GibbsCluster 2.0 analysis (right). In cases when no distinct motif was observed, the motifs were grouped (yellow boxes).

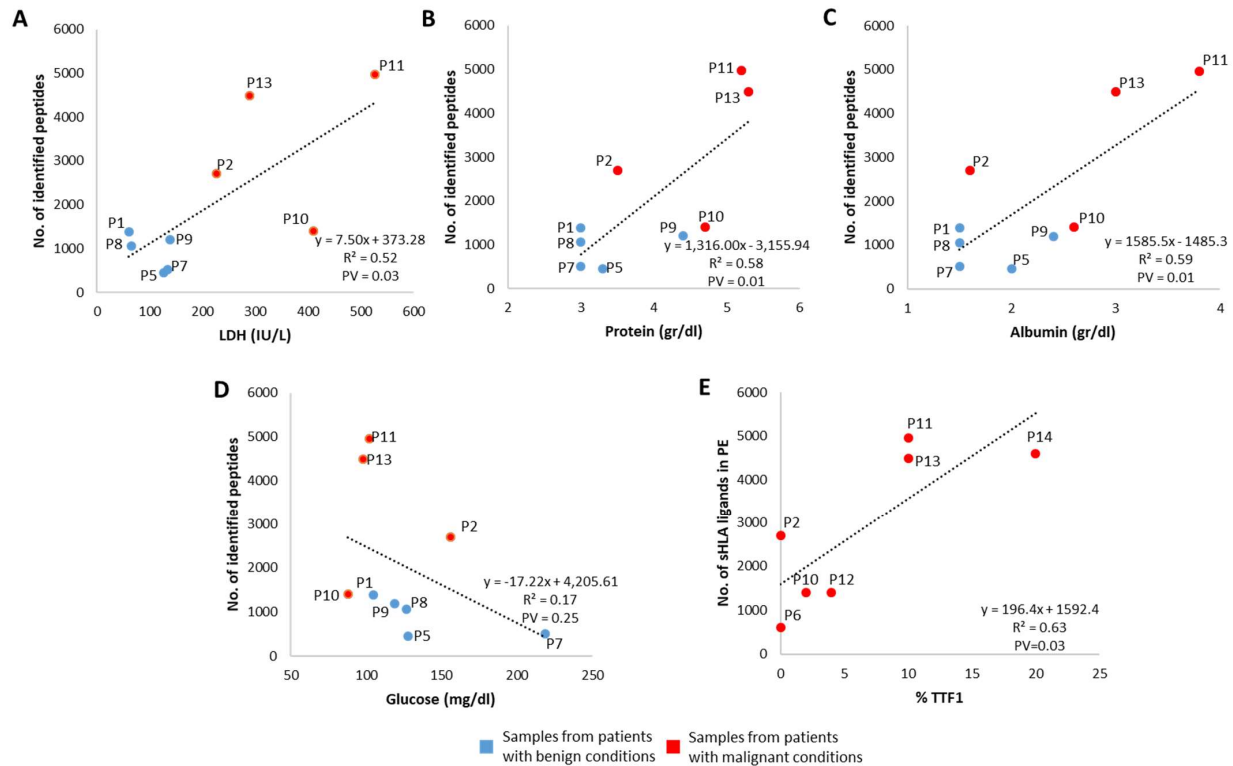

**Supplementary Figure S3. Linear regression analyses between the numbers of identified peptides and the levels of LDH (A), protein (B), albumin (C), glucose (D), and TTF1 (E). In A-D the presented data is of Patients 1, 2, 5, 7, 8, 9, 10, 11, 13. In E, the percentage of TTF1 was calculated from paraffin-embedded cell blocks from Patients 2, 6, 10, 11, 12, 13, 14.  $R^2$  and p-value are indicated in each graph.**



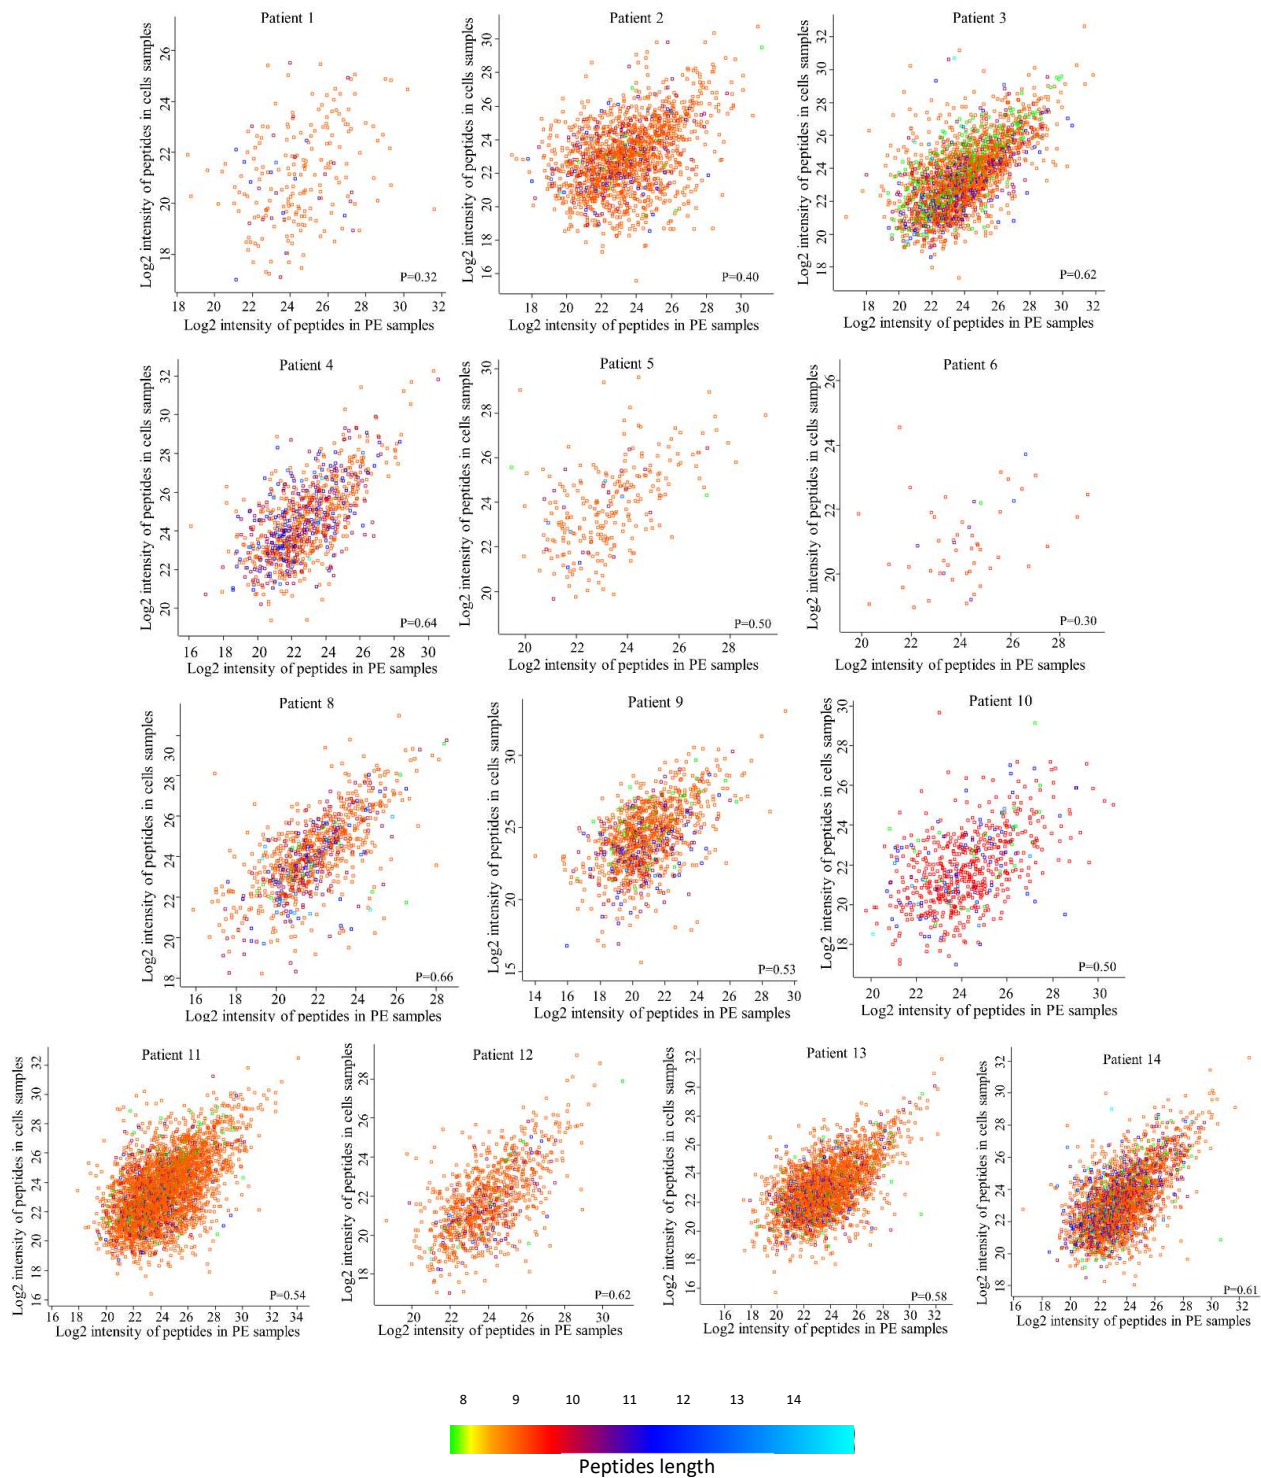

**Supplementary Figure S4. Similarities between membranal and soluble pHLA peptidomes of each patient.** Scatter plots on log<sub>2</sub> scales of the LC-MS intensities of membranal and soluble pHLA peptidomes. Pearson correlation is indicated in each graph.

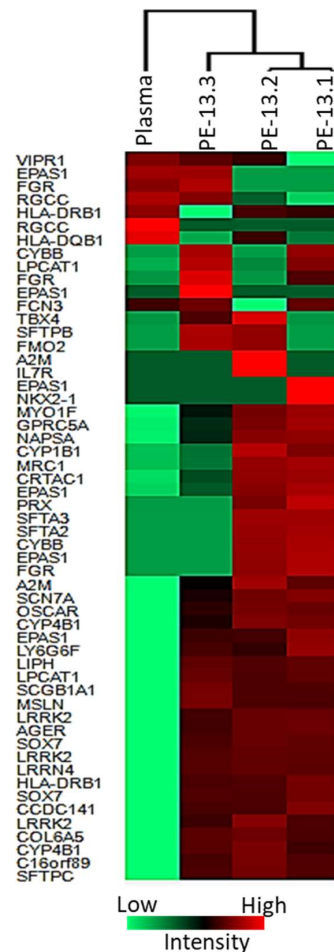

**Supplementary Figure S5. HLA ligands derived from lung-associated proteins are more abundant in the peHLA peptidome than in the plasma sHLA peptidome.** Hierarchical cluster analysis of lung-associated genes, as defined by the Human Protein Atlas (HPA, retrieved April 1, 2021), that were also the source for peptides in the soluble peHLA peptidome and the plasma sHLA peptidome. Three samples of pleural effusions from P13, taken from different visits to the clinic, are compared with a plasma sample from the same patient. The presented log<sub>2</sub> intensities were normalized by Z-score.

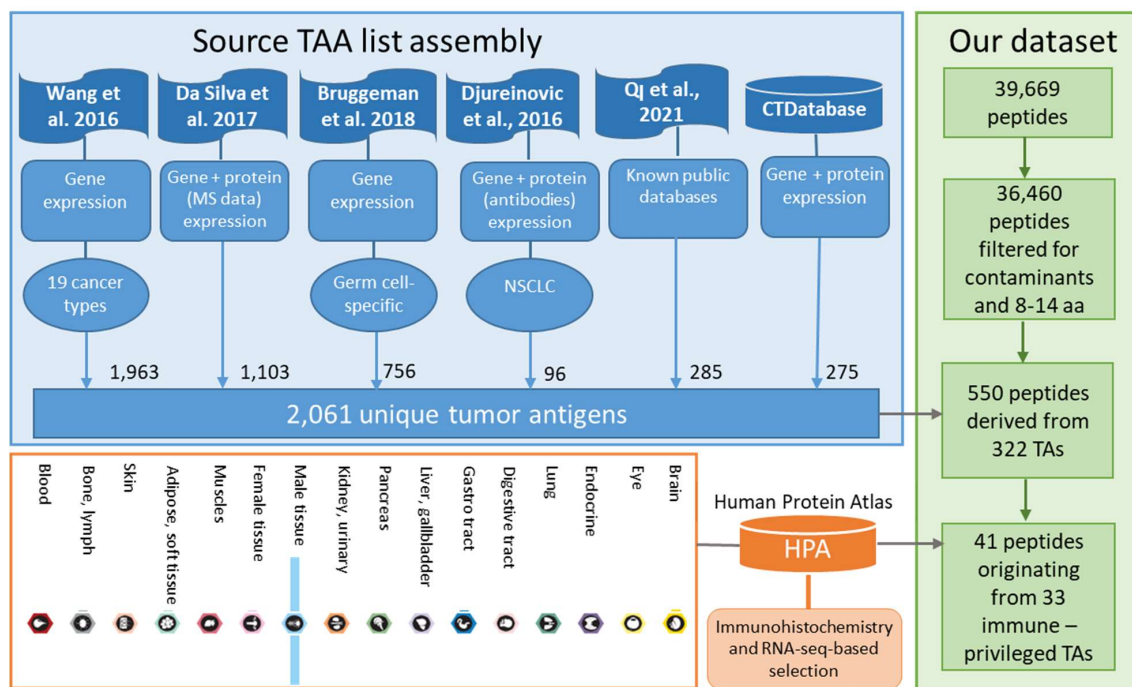

**Supplementary Figure S6. Summary of the process for defining tumor antigens.** Tumor antigens, including CTAs, were defined by using six publicly available databases: Supplementary Data 3C published data by Wang et al. (Wang et al., 2016); Supplementary Table 2 published by da Silva et al. (da Silva et al. 2017); Supplementary Table 1D published by Bruggeman et al. (Bruggeman et al. 2018); Supplementary Table 5 published by Djureinovic et al. (Djureinovic et al. 2016); and Supplementary Table S4 published by Qi et al. (Qi et al., 2021); CTDatabase (<http://www.cta.lncc.br/index.php>). Each gene was scored 1-6, according to the number of databases in which it was classified as a CTA. The source proteins of the identified peptides were next checked for restricted expression in tumors and testis according to the Human Protein Atlas (Uhlen et al. 2010).

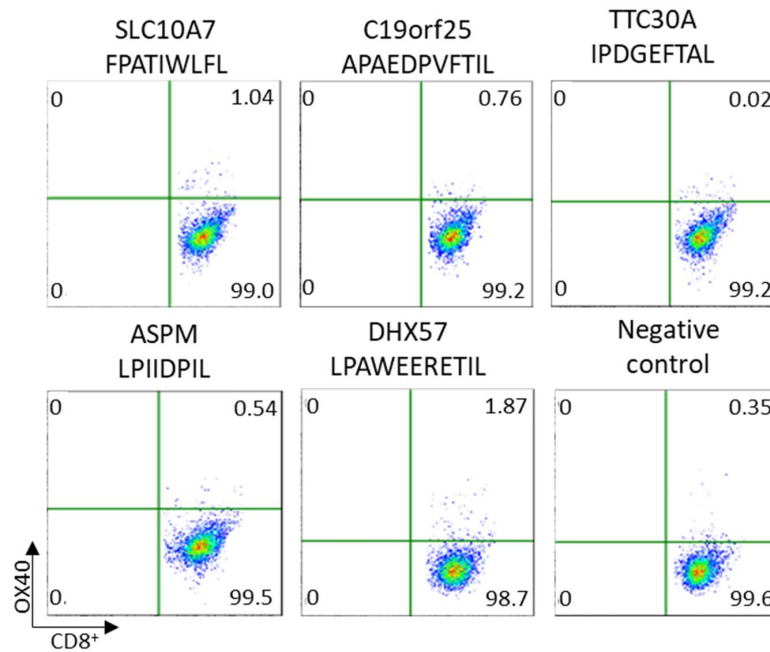

**Supplementary Figure S7. FACS analysis of OX40 expression.** The assay was performed on purified naïve CD8<sup>+</sup> T cells, from healthy HLA-B\*35:02 positive donor, by co-cultured with peptide-loaded autologous DCs. Pseudo-color dot plots display the responses for the five HLA peptides and the negative control (cells stimulated with empty DCs). Upper numbers in the quadrants show percentages of CD8<sup>+</sup>/OX40<sup>+</sup> cells.

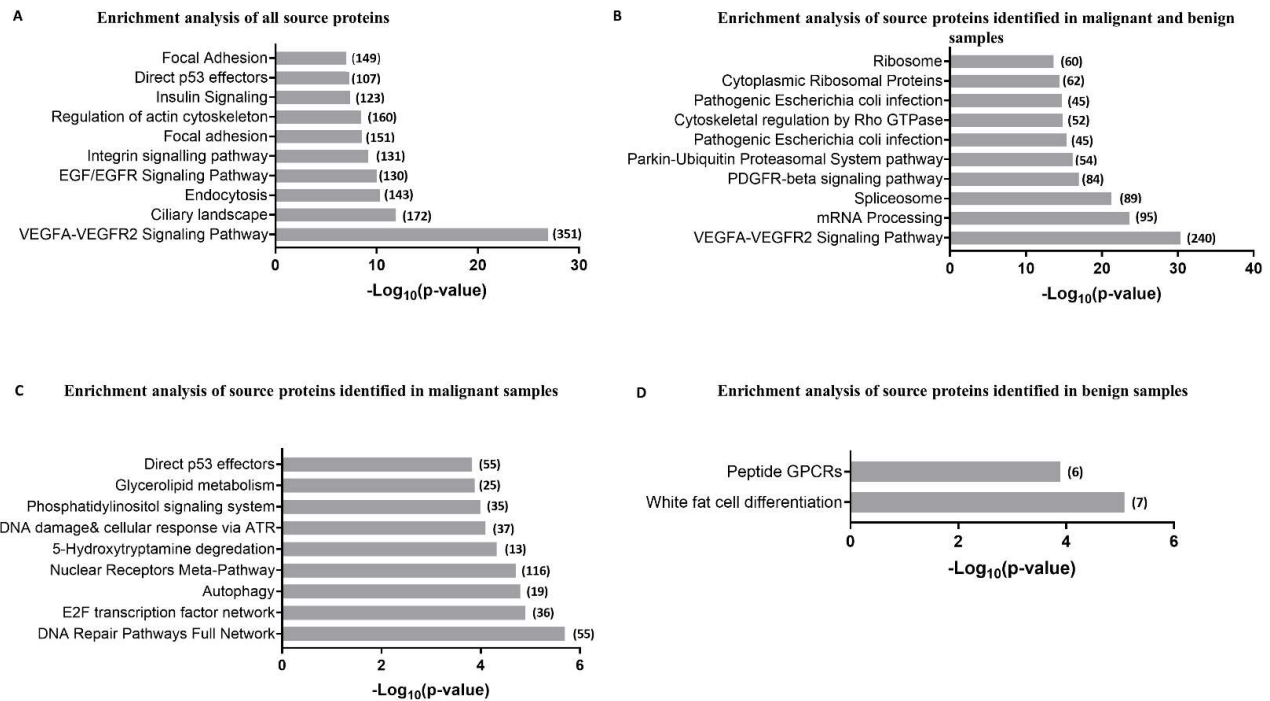

**Supplementary Figure S8. ToppGene pathway enrichment analysis of source proteins of the identified HLA peptides.** Functional pathway enrichment analysis of the source proteins of the HLA peptides analyzed by ToppGene (<https://toppgene.cchmc.org/>) from **(A)** all the samples, **(B)** source proteins that were common to benign and malignant effusions, **(C)** source proteins that were unique to malignant effusions, and **(D)** source proteins that were unique to benign effusions. The top ten significantly enriched functional clusters (y-axis) are displayed over the corresponding  $-\log_{10}$  p-value (x-axis). The p-value represents the probability of discovering at least x number of genes (x = number in brackets) out of the total number of the genes in the list (Supplementary Table S9) annotated to a particular functional cluster given the proportion of genes in the whole genome that are annotated to that functional cluster.

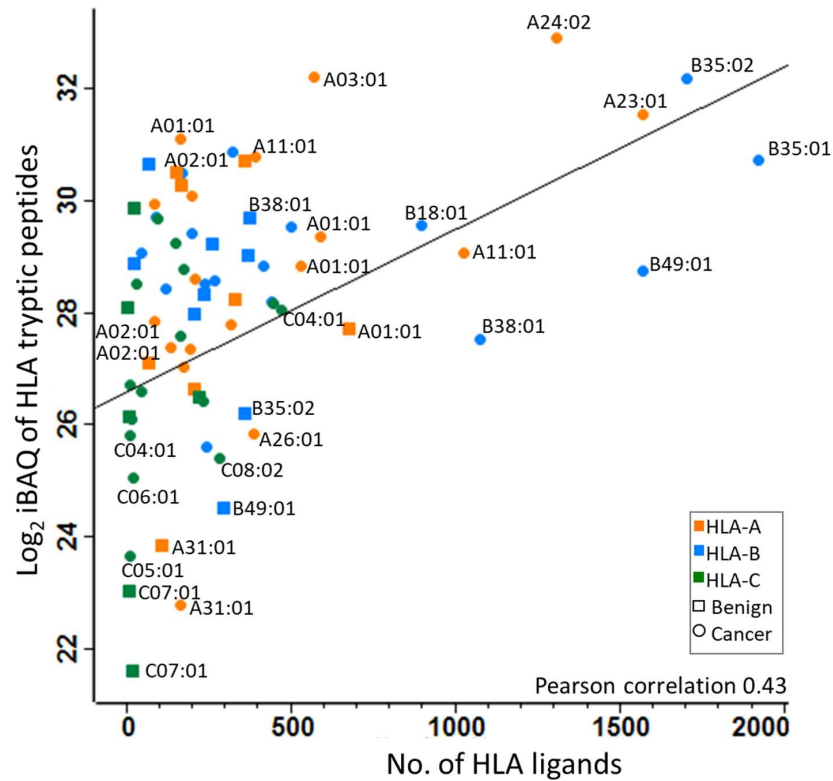

**Supplementary Figure S9. The iBAQ intensity of HLA molecules purified from pleural fluids correlate with the number of putative HLA ligands presented by each allotype.** HLA heavy chains from 80% acetonitrile fractions of the HLA immunoaffinity purification from pleural fluids of Patients 1-14 were digested with trypsin and the peptides were analyzed by LC-MS/MS. Colors represent the HLA allele, i.e. HLA-A (orange), HLA-B (blue), HLA-C (green). Circles stand for cancer and square for benign patients.
