# Supplementary material for: Soluble HLA peptidome of pleural effusions is a valuable source for tumor antigens
Source: HighWire-hosted journal article supplement (doi:10.1136/jitc-2021-003733), 2022-05-01
Supplement: jitc-2021-003733supp007_data_supplement.xlsx [file jitc-2021-003733supp007_data_supplement.xlsx]

## Sheet: Sheet1
Supplementary Table S6. Compiled list of tumor antigens. Score represents the number of databases in which the gene was recognized as TAA.
Gene name	Score	CTDatabase	Da Silva et al., 2017	Bruggeman et al., 2018	Wang et al., 2016	Djureinovic et al., 2016	Qi et al., 2021
MAGEA1	4	+	+			+	+
ACRBP	2	+					+
ACTL8	5	+	+		+	+	+
ADAM2	4	+	+		+		+
ADAM29	3	+	+				+
AKAP3	3	+		+			+
AKAP4	4	+	+		+		+
ANKRD45	2	+					+
ARMC3	4	+		+	+		+
ARX	2	+					+
ATAD2	2	+					+
BAGE	2	+					+
BAGE2	3	+	+				+
BAGE3	2	+					+
BAGE4	2	+					+
BAGE5	2	+					+
BRDT	6	+	+	+	+	+	+
C15orf60	3	+			+		+
C21orf99	1	+
CABYR	3	+	+				+
CAGE1	3	+	+				+
CALR3	3	+	+				+
CASC5	3	+		+			+
CCDC110	2	+					+
CCDC33	2	+					+
CCDC36	2	+					+
CCDC62	3	+	+				+
CCDC83	3	+	+				+
CDCA1	2	+					+
CEP290	2	+					+
CEP55	2	+					+
COX6B2	2	+					+
CPXCR1	3	+	+				+
CRISP2	4	+	+		+		+
CSAG1	2	+					+
CSAG2	2	+					+
CSAG3B	1	+
CT16.2	1	+
CT45A1	3	+	+				+
CT45A2	3	+	+				+
CT45A3	3	+	+				+
CT45A4	2	+					+
CT45A5	4	+	+			+	+
CT45A6	3	+	+				+
CT47A1	4	+	+		+		+
CT47A10	4	+	+		+		+
CT47A11	3	+	+				+
CT47A2	4	+	+		+		+
CT47A3	3	+	+				+
CT47A4	3	+	+				+
CT47A5	3	+	+				+
CT47A6	4	+	+		+		+
CT47A7	3	+	+				+
CT47A8	3	+	+				+
CT47A9	4	+	+		+		+
CT47B1	4	+	+		+		+
CT66/AA884595	1	+
CT69/BC040308	1	+
CT70/BI818097	1	+
CTAG1A	3	+	+				+
CTAG1B	4	+	+		+		+
CTAG2	3	+	+				+
CTAGE1	3	+	+				+
CTAGE-2	1	+
CTAGE5	3	+		+			+
CTCFL	5	+	+	+		+	+
CTNNA2	2	+					+
CXorf48	3	+			+		+
Cxorf61	3	+			+		+
cyclin A1	1	+
DCAF12	2	+					+
DDX43	4	+		+	+		+
DDX53	4	+	+		+		+
DKKL1	4	+	+		+		+
DMRT1	4	+	+		+		+
DNAJB8	4	+	+		+		+
DPPA2	5	+	+	+		+	+
DSCR8	4	+		+		+	+
EDAG, NDR	1	+
ELOVL4	2	+					+
FAM133A	3	+			+		+
FAM46D	3	+	+				+
FATE1	5	+	+	+	+		+
FBXO39	3	+	+				+
FMR1NB	4	+	+		+		+
FTHL17	4	+	+			+	+
GAGE1	4	+	+			+	+
GAGE12B	2	+					+
GAGE12C	2	+	+
GAGE12D	3	+	+		+
GAGE12E	3	+	+				+
GAGE12F	3	+	+				+
GAGE12G	3	+	+				+
GAGE12H	3	+	+				+
GAGE12I	3	+				+	+
GAGE12J	4	+	+		+		+
GAGE13	3	+	+				+
GAGE2A	4	+	+		+		+
GAGE3	1	+
GAGE4	2	+					+
GAGE5	2	+					+
GAGE6	2	+					+
GAGE7	2	+					+
GAGE8	2	+					+
GOLGAGL2 FA	1	+
GPAT2	2	+					+
GPATCH2	2	+					+
HIWI, MIWI, PIWI	1	+
HORMAD1	5	+	+	+	+		+
HORMAD2	4	+	+		+		+
HSPB9	2	+					+
IGSF11	2	+					+
IL13RA2	3	+			+		+
IMP-3	1	+
JARID1B	2	+					+
KIAA0100	2	+					+
LAGE-1b	1	+
LDHC	4	+	+		+		+
LEMD1	4	+	+	+			+
LIPI	2	+					+
LOC130576	1	+
LOC196993	1	+
LOC348120	1	+
LOC440934	1	+
LOC647107	2	+					+
LOC728137	1	+
LUZP4	5	+	+	+	+		+
LY6K	3	+			+		+
MAEL	4	+	+		+		+
MAGEA10	3	+				+	+
MAGEA11	4	+	+			+	+
MAGEA12	4	+	+			+	+
MAGEA2	3	+	+				+
MAGEA2B	4	+	+		+		+
MAGEA3	6	+	+	+	+	+	+
MAGEA4	6	+	+	+	+	+	+
MAGEA5	2	+					+
MAGEA6	5	+	+		+	+	+
MAGEA8	4	+	+			+	+
MAGEA9	3	+	+				+
MAGEA9B/LOC728269	1	+
MAGEB1	5	+	+	+	+		+
MAGEB2	6	+	+	+	+	+	+
MAGEB3	4	+	+		+		+
MAGEB4	3	+	+				+
MAGEB5	3	+	+				+
MAGEB6	5	+	+		+	+	+
MAGEC1	5	+	+		+	+	+
MAGEC2	5	+	+		+	+	+
MAGEC3	2	+					+
MCAK	1	+
MMA1b	1	+
MORC1	4	+	+		+		+
MPHOSPH1	2	+					+
NLRP4	4	+	+		+		+
NOL4	2	+					+
NR6A1	2	+					+
NXF2	2	+					+
NXF2B	2	+					+
ODF1	3	+	+				+
ODF2	3	+			+		+
ODF3	4	+	+		+		+
ODF4	3	+	+				+
OIP5	3	+			+		+
OTOA	2	+					+
PAGE1	4	+	+			+	+
PAGE2	5	+	+		+	+	+
PAGE2B	4	+	+		+		+
PAGE3	3	+	+				+
PAGE4	2	+					+
PAGE5	4	+	+			+	+
PASD1	5	+	+		+	+	+
PBK	3	+	+				+
PEPP2	2	+					+
PIWIL2	4	+		+	+		+
PLAC1	3	+				+	+
POTEA	3	+	+				+
POTEB	3	+	+				+
POTEC	3	+	+				+
POTED	3	+	+				+
POTEE	2	+					+
POTEG	3	+	+				+
POTEH	2	+					+
PRAME	5	+	+	+		+	+
PRM1	3	+	+				+
PRM2	4	+	+		+		+
PRSS54	4	+	+		+		+
PRSS55	4	+	+		+		+
PTPN20A	2	+					+
RBM46	4	+	+		+		+
RGS22	2	+					+
ROPN1	5	+	+	+	+		+
RQCD1	2	+					+
SAGE1	4	+	+			+	+
SEMG1	2	+					+
SLCO6A1	3	+	+				+
SPA17	4	+	+		+		+
SPACA3	4	+	+		+		+
SPAG1	2	+					+
SPAG17	2	+					+
SPAG4	2	+					+
SPAG6	3	+			+		+
SPAG8	2	+					+
SPAG9	2	+					+
SPANXA1	3	+	+				+
SPANXA2	4	+	+		+		+
SPANXB1	3	+	+				+
SPANXB2	2	+					+
SPANXC	5	+	+		+	+	+
SPANXD	3	+	+				+
SPANXE	2	+					+
SPANXN1	3	+	+				+
SPANXN2	3	+	+				+
SPANXN3	4	+	+		+		+
SPANXN4	3	+	+				+
SPANXN5	3	+	+				+
SPATA19	4	+	+		+		+
SPEF2	2	+					+
SPINLW1	2	+					+
SPO11	3	+	+				+
SSX1	3	+	+				+
SSX2	3	+	+				+
SSX2b	3	+	+				+
SSX3	3	+	+				+
SSX4	3	+	+				+
SSX4B	3	+	+				+
SSX5	4	+	+		+		+
SSX6	2	+					+
SSX7	2	+					+
SSX9	2	+					+
SYCE1	3	+			+		+
SYCP1	4	+	+		+		+
TAF7L	3	+			+		+
TAG	1	+
TDRD1	4	+		+	+		+
TDRD4	2	+					+
TDRD6	2	+					+
TEKT5	4	+	+		+		+
TEX101	4	+	+		+		+
TEX14	4	+	+		+		+
TEX15	3	+	+				+
TFDP3	3	+	+				+
THEG	3	+	+				+
TMEFF1	2	+					+
TMEFF2	2	+					+
TMEM108	2	+					+
TMPRSS12	4	+	+		+		+
TPPP2	4	+	+		+		+
TPTE	5	+	+	+		+	+
TSGA10	3	+			+		+
TSP50	2	+					+
TSPY1D	1	+
TSPY1E	1	+
TSPY1F	1	+
TSPY1G	1	+
TSPY1H	1	+
TSPY1I	1	+
TSPY2	4	+	+			+	+
TSPY3	3	+	+				+
TSSK6	2	+					+
TTK	4	+	+	+			+
TULP2	2	+					+
VENTXP1	2	+					+
XAGE1	1	+
XAGE1B	3	+	+			+
XAGE1C	2	+				+
XAGE1D	1	+
XAGE1E	4	+	+			+	+
XAGE2	2	+					+
XAGE3	2	+					+
XAGE-3b	1	+
XAGE-4/RP11-167P23.2	1	+
XAGE5	4	+	+			+	+
ZNF165	2	+					+
ZNF645	3	+	+				+
ABHD1	1		+
ACR	2		+		+
ACRV1	2		+		+
ACSBG2	2		+		+
ACTL7A	1		+
ACTL7B	2		+		+
ACTL9	2		+		+
ACTRT1	1		+
ACTRT2	2		+		+
ADAD1	2		+		+
ADAD2	2		+		+
ADAM18	2		+		+
ADAM20	1		+
ADAM30	1		+
ADAM7	1		+
ADAMTS20	1		+
ADIG	2		+		+
AHRR	1		+
AKNAD1	1		+
ALLC	1		+
ALS2CR11	1		+
AMELY	1		+
ANHX	1		+
ANKRD20A2	1		+
ANKRD60	1		+
ANKRD7	2		+		+
APITD1-CORT	1		+
APOBEC4	1		+
ARGFX	1		+
ARL14EPL	1		+
ASB17	1		+
ASZ1	2		+		+
ATP11AUN	1		+
ATXN3L	1		+
AUNIP	2		+	+
AXDND1	1		+
BANF2	2		+		+
BARHL2	1		+
BEND2	2		+		+
BHLHE23	1		+
BHMG1	1		+
BIRC8	1		+
BMP15	1		+
BOD1L2	1		+
BOLL	2		+		+
BPIFA3	1		+
BPIFB3	1		+
BPIFC	1		+
BPY2	1		+
BPY2B	1		+
BPY2C	1		+
BSPH1	1		+
BSX	1		+
BTG4	1		+
BUB1B-PAK6	1		+
C10orf113	1		+
C10orf120	1		+
C10orf53	1		+
C10orf62	2		+		+
C11orf71	2		+	+
C11orf94	1		+
C12orf40	1		+
C12orf50	1		+
C12orf54	2		+			+
C12orf80	1		+
C14orf177	1		+
C15orf32	1		+
C15orf43	1		+
C16orf78	1		+
C16orf82	1		+
C16orf90	1		+
C16orf97	1		+
C17orf104	2		+		+
C17orf105	1		+
C17orf112	1		+
C17orf50	1		+
C17orf64	2		+		+
C17orf74	1		+
C17orf98	1		+
C18orf63	1		+
C19orf45	1		+
C19orf67	1		+
C19orf84	1		+
C1orf100	1		+
C1orf111	1		+
C1orf146	1		+
C1orf158	1		+
C1orf167	1		+
C1orf185	1		+
C1orf234	1		+
C1orf94	2		+	+
C20orf141	1		+
C20orf144	1		+
C20orf173	1		+
C20orf195	1		+
C20orf78	1		+
C22orf42	1		+
C2orf61	1		+
C2orf78	1		+
C3orf20	1		+
C3orf22	2		+		+
C3orf30	2		+		+
C3orf56	1		+
C3orf79	1		+
C3orf84	1		+
C4orf17	1		+
C4orf45	1		+
C4orf51	1		+
C5orf47	2		+		+
C5orf52	1		+
C5orf58	2		+		+
C5orf60	1		+
C6orf10	2		+		+
C6orf201	1		+
C6orf99	1		+
C7orf33	1		+
C7orf34	1		+
C7orf62	1		+
C7orf65	1		+
C7orf66	1		+
C7orf71	1		+
C7orf72	1		+
C8orf74	1		+
C9orf131	2		+	+
C9orf153	1		+
C9orf43	1		+
C9orf57	1		+
CABP2	1		+
CABS1	2		+		+
CAPZA3	1		+
CATSPER4	1		+
CATSPERD	1		+
CCDC105	1		+
CCDC155	2		+		+
CCDC166	1		+
CCDC168	1		+
CCDC169-SOHLH2	1		+
CCDC172	1		+
CCDC179	1		+
CCDC182	1		+
CCDC183	1		+
CCDC185	1		+
CCDC27	1		+
CCDC42	1		+
CCDC54	2		+		+
CCDC63	1		+
CCDC70	1		+
CCDC79	1		+
CCER1	1		+
CCIN	2		+		+
CCL27	1		+
CCNYL3	1		+
CCT8L2	2		+		+
CD200R1L	1		+
CDC20B	1		+
CDRT15	1		+
CDRT15L2	1		+
CDY1	1		+
CDY1B	1		+
CDY2B	1		+
CELA3B	1		+
CEP295NL	1		+
CERS3	1		+
CETN1	1		+
CFHR5	1		+
CGB1	1		+
CGB5	1		+
CGB8	1		+
CIB3	1		+
CIB4	1		+
CLPSL1	1		+
CLPSL2	1		+
CLRN1	1		+
CLRN2	1		+
CMTM1	2		+	+
CMTM2	1		+
CNBD1	1		+
CNBD2	1		+
CNGA2	1		+
CNTD1	1		+
COX7B2	2		+			+
COX8C	1		+
CPA5	1		+
CRISP1	1		+
CRYBA4	1		+
CRYGC	1		+
CSH1	1		+
CSH2	1		+
CSHL1	1		+
CSN3	1		+
CSNK1A1L	1		+
CST8	2		+			+
CST9	1		+
CST9L	1		+
CSTL1	1		+
CT45A10	1		+
CT45A7	1		+
CT45A8	1		+
CT45A9	1		+
CT47A12	1		+
CT62	1		+
CT83	2		+			+
CTAGE6	1		+
CTAGE9	1		+
CXorf49	1		+
CXorf49B	1		+
CXorf51A	1		+
CXorf51B	1		+
CXorf66	2		+		+
CYLC1	1		+
CYLC2	1		+
CYP11B1	1		+
CYP11B2	1		+
DAZ1	1		+
DAZ2	1		+
DAZ3	1		+
DAZ4	1		+
DAZL	2		+		+
DBX1	1		+
DCAF4L1	1		+
DCAF4L2	4		+	+	+	+
DCAF8L1	1		+
DCAF8L2	1		+
DCDC2C	1		+
DCST1	1		+
DDI1	1		+
DDX4	2		+		+
DEFB104A	1		+
DEFB104B	1		+
DEFB105A	1		+
DEFB105B	1		+
DEFB106A	1		+
DEFB106B	1		+
DEFB107A	1		+
DEFB107B	1		+
DEFB110	1		+
DEFB112	1		+
DEFB114	1		+
DEFB118	1		+
DEFB119	2		+		+
DEFB121	1		+
DEFB123	2		+		+
DEFB125	1		+
DEFB126	1		+
DEFB127	1		+
DEFB128	1		+
DEFB129	1		+
DEFB130	1		+
DEFB134	1		+
DEFB135	1		+
DMRTB1	2		+		+
DMRTC2	2		+		+
DNAH17	1		+
DNAJB3	1		+
DND1	1		+
DPEP3	4		+	+	+	+
DPPA3	1		+
DPPA5	1		+
DRD3	1		+
DSCR4	2		+			+
DUSP21	1		+
DUX4	1		+
DYDC1	1		+
EBLN1	1		+
EDDM3B	1		+
EFCAB3	1		+
EFCAB5	2		+		+
EFCAB9	1		+
ELSPBP1	1		+
ENDOV	1		+
ENTHD1	2		+		+
EPPIN	1		+
EPPIN-WFDC6	1		+
EQTN	1		+
ERICH6	1		+
ERICH6B	1		+
ESX1	1		+
EVX2	1		+
EXD1	1		+
FABP12	1		+
FAM154A	2		+		+
FAM166A	2		+		+
FAM170A	2		+		+
FAM170B	1		+
FAM187B	1		+
FAM197Y9	1		+
FAM205A	2		+		+
FAM205C	1		+
FAM209A	1		+
FAM217A	1		+
FAM221B	1		+
FAM231D	1		+
FAM24A	1		+
FAM25C	1		+
FAM25G	1		+
FAM26D	1		+
FAM47A	1		+
FAM47B	1		+
FAM47C	1		+
FAM71A	2		+		+
FAM71B	1		+
FAM71C	1		+
FAM71D	1		+
FAM71E1	1		+
FAM71E2	1		+
FAM71F1	2		+			+
FAM9A	2		+		+
FAM9B	2		+		+
FAM9C	3		+	+	+
FANCA	2		+	+
FANCD2OS	1		+
FANCD2P2	1		+
FBXO47	1		+
FEZF1	2		+			+
FGF4	2		+			+
FKBP6	2		+		+
FNDC7	1		+
FNDC8	1		+
FOXE3	1		+
FOXR1	1		+
FOXR2	1		+
FSCB	1		+
FSCN3	1		+
FTH1P18	1		+
FTMT	2		+		+
FUT5	1		+
GAB4	2		+			+
GABRR3	1		+
GAGE2E	1		+
GALNTL5	1		+
GAPDHS	2		+		+
GAST	1		+
GGN	1		+
GIP	1		+
GJA10	1		+
GJA8	1		+
GK2	1		+
GLIPR1L1	2		+		+
GLT6D1	1		+
GOLGA6A	1		+
GOLGA6B	1		+
GOLGA6C	2		+		+
GOLGA6D	1		+
GOLGA6L1	1		+
GOLGA6L2	1		+
GOLGA6L22	1		+
GOLGA6L6	1		+
GOT1L1	1		+
GPHB5	1		+
GPR139	1		+
GPR31	1		+
GPR32	1		+
GPX5	1		+
GPX6	1		+
GRXCR1	1		+
GS1-259H13.2	1		+
GSC2	1		+
GSG1	1		+
GSTA5	1		+
GTF2A1L	1		+
GTSF1	3		+	+	+
GTSF1L	2		+		+
GUCA1A	1		+
H1FNT	2		+		+
H1FOO	1		+
H2AFB1	1		+
H2AFB3	1		+
H2BFWT	1		+
HDGFL1	3		+	+	+
HEATR9	1		+
HES3	1		+
HIGD1C	1		+
HIST1H1A	1		+
HIST1H1T	2		+		+
HIST1H2AA	1		+
HIST1H2BA	1		+
HIST1H2BB	1		+
HIST1H3J	1		+
HIST1H4F	1		+
HLA-DQB3	1		+
HMGB4	2		+		+
HMHB1	1		+
HNRNPCL1	1		+
HNRNPCL2	1		+
HNRNPCL4	1		+
HSF5	2		+		+
HSFX2	1		+
HSFY1	1		+
HSFY2	1		+
HTN1	1		+
HTN3	1		+
HYPM	1		+
IGF2BP1	3		+	+	+
IGLL1	2		+	+
IL13	1		+
IL17F	1		+
IL21	1		+
IL3	1		+
IL31	1		+
IL4I1	2		+	+
INHA	1		+
INSL3	1		+
INSL6	2		+		+
IQCA1L	1		+
IQCF1	1		+
IQCF2	1		+
IQCF3	1		+
IQCF5	1		+
IQCF6	1		+
IRGC	2		+		+
IZUMO1	2		+		+
IZUMO2	1		+
IZUMO3	1		+
KCNA10	1		+
KCNU1	1		+
KCNV2	1		+
KCTD19	2		+		+
KIF24	2		+	+
KIF2B	1		+
KIF4B	1		+
KLHL10	1		+
KRT25	1		+
KRT26	1		+
KRT28	1		+
KRT33A	1		+
KRT33B	1		+
KRT35	1		+
KRT82	1		+
KRTAP10-1	1		+
KRTAP10-12	1		+
KRTAP10-2	1		+
KRTAP10-6	1		+
KRTAP10-7	1		+
KRTAP12-4	1		+
KRTAP13-1	1		+
KRTAP19-8	1		+
KRTAP20-1	1		+
KRTAP20-2	1		+
KRTAP21-1	1		+
KRTAP21-2	1		+
KRTAP26-1	1		+
KRTAP6-1	1		+
KRTAP8-1	1		+
KRTAP9-2	1		+
LACTBL1	1		+
LALBA	1		+
LCA5L	2		+	+
LCE2D	1		+
LCE3C	1		+
LDHAL6B	1		+
LELP1	2		+		+
LGALS13	1		+
LIN28B	4		+	+	+	+
LINC00083	1		+
LINC00452	1		+
LINC00684	1		+
LOC100132304	1		+
LOC100133267	1		+
LOC100505478	1		+
LOC100505841	1		+
LOC101929983	1		+
LOC400736	1		+
LOC730159	1		+
LOC81691	1		+
LRIT1	1		+
LRRC52	1		+
LRRC72	1		+
LRRC74A	1		+
LRRD1	1		+
LYPD4	1		+
LYZL1	2		+		+
LYZL2	2		+		+
LYZL4	2		+		+
LYZL6	1		+
MAF	1		+
MAGEA9B	3		+		+		+
MAGEB16	2		+			+
MAGEB17	1		+
MAGEB18	1		+
2021-03-10	1		+
2021-03-11	1		+
MBD3L1	1		+
MBD3L2	1		+
MBD3L3	1		+
MBD3L4	1		+
MBD3L5	1		+
MC3R	1		+
MCMDC2	2		+	+
MEIOB	1		+
MGAT4D	1		+
MMP20	1		+
MOS	1		+
MPC1L	1		+
MRGPRG	1		+
MRGPRX4	1		+
MROH2B	1		+
MROH8	1		+
MS4A13	1		+
MS4A18	1		+
MS4A5	1		+
MS4A6E	1		+
NAA11	2		+		+
NACA2	2		+	+
NANOS2	2		+		+
NBPF6	1		+
NEUROG1	1		+
NEUROG2	1		+
NKX1-1	1		+
NKX2-4	2		+			+
NLRP10	1		+
NLRP5	1		+
NLRP8	1		+
NMS	1		+
NOBOX	2		+			+
NT5C1B	1		+
NT5C1B-RDH14	1		+
NUP210L	2		+		+
NUTM1	1		+
NUTM2F	1		+
OAZ3	2		+	+
OCM2	1		+
OFCC1	2		+			+
OOSP2	1		+
OPN1LW	1		+
OPN5	1		+
OR10A4	1		+
OR10A7	1		+
OR10H5	1		+
OR10J1	1		+
OR11A1	1		+
OR11G2	1		+
OR11H4	1		+
OR11H6	1		+
OR13C3	1		+
OR13D1	1		+
OR13G1	1		+
OR14A16	1		+
OR14J1	1		+
OR1C1	1		+
OR1D2	1		+
OR1E1	1		+
OR1G1	1		+
OR1J2	1		+
OR1J4	1		+
OR1K1	1		+
OR1L3	1		+
OR1N1	1		+
OR2A4	1		+
OR2AK2	1		+
OR2D2	1		+
OR2F1	1		+
OR2F2	1		+
OR2G6	1		+
OR2H1	1		+
OR2J2	1		+
OR2J3	1		+
OR2K2	1		+
OR2V2	1		+
OR2W1	1		+
OR2W5	1		+
OR3A1	1		+
OR4A16	1		+
OR4D1	1		+
OR4D6	1		+
OR4E1	1		+
OR4E2	1		+
OR4F3	1		+
OR4K1	1		+
OR4M1	1		+
OR4M2	1		+
OR4N2	1		+
OR4N4	1		+
OR4Q3	1		+
OR51A7	1		+
OR51I2	1		+
OR51Q1	1		+
OR51S1	1		+
OR52D1	1		+
OR52E2	2		+			+
OR52E4	1		+
OR52E6	1		+
OR52H1	1		+
OR52L1	1		+
OR56A1	1		+
OR56A3	2		+			+
OR56A5	1		+
OR5A1	1		+
OR5AC2	1		+
OR5B12	1		+
OR5B2	1		+
OR5B21	1		+
OR5C1	1		+
OR5H14	1		+
OR5H15	1		+
OR5H6	1		+
OR5M11	1		+
OR5M8	1		+
OR5V1	1		+
OR6A2	1		+
OR6B1	1		+
OR6B2	1		+
OR6C2	1		+
OR6F1	1		+
OR6V1	1		+
OR7D4	1		+
OR7E24	1		+
OR8A1	1		+
OR8B12	1		+
OR8B2	1		+
OR8B3	1		+
OR8D1	1		+
OR8G1	1		+
OR8G5	1		+
OR8S1	1		+
OR9Q2	1		+
OTOG	1		+
OTOP2	1		+
OTP	1		+
PABPC3	2		+	+
PANX3	1		+
PAPOLB	1		+
PATE3	1		+
PCDHA1	2		+	+
PCDHA13	1		+
PCDHA2	1		+
PCDHA4	2		+	+
PCDHA5	1		+
PCDHA7	1		+
PCDHA8	1		+
PCDHA9	1		+
PCDHAC1	2		+	+
PCP2	1		+
PDCL2	2		+		+
PDHA2	2		+		+
PDILT	1		+
PDZD9	1		+
PFN3	2		+		+
PFN4	1		+
PGK2	2		+		+
PHF7	1		+
PIH1D2	2		+		+
PIK3R3	1		+
PIWIL1	2		+		+
PIWIL3	2		+			+
PKD2L2	1		+
PKMYT1	1		+
PLA2G2E	1		+
PLCZ1	1		+
POM121L12	1		+
POM121L2	1		+
POTEB2	1		+
POTEB3	1		+
POTEF	1		+
POU4F2	2		+			+
POU5F2	1		+
PP2D1	1		+
PPEF2	1		+
PPP3R2	1		+
PRAMEF1	1		+
PRAMEF11	1		+
PRAMEF12	1		+
PRAMEF14	1		+
PRAMEF15	1		+
PRAMEF19	1		+
PRAMEF2	1		+
PRAMEF20	1		+
PRAMEF4	1		+
PRAMEF5	1		+
PRAMEF6	1		+
PRAMEF9	1		+
PRDM13	1		+
PRDM14	1		+
PRDM7	1		+
PRDM9	2		+			+
PRH1	1		+
PRKACG	1		+
PRM3	1		+
PRND	2		+		+
PRPS1L1	1		+
PRR20A	1		+
PRR20B	1		+
PRR20C	1		+
PRR20D	1		+
PRR20E	1		+
PRR23A	1		+
PRR23B	1		+
PRR23D1	1		+
PRR23D2	1		+
PRR30	1		+
PRSS37	2		+		+
PRSS38	1		+
PRSS41	1		+
PRSS58	2		+		+
PRY2	1		+
PSG11	1		+
PSG3	1		+
PSG8	1		+
PSKH2	1		+
PSMA8	2		+		+
PSMB11	1		+
PTF1A	1		+
PTH2	1		+
PURG	1		+
R3HDML	1		+
RAD21L1	1		+
RAD51AP2	1		+
RBAK-RBAKDN	1		+
RBMXL2	3		+	+	+
RBMXL3	1		+
RBMY1A1	2		+		+
RBMY1B	2		+		+
RBMY1D	1		+
RBMY1E	2		+		+
RBMY1F	2		+		+
RBMY1J	2		+		+
RBPJL	1		+
REC114	1		+
RFPL4AL1	1		+
RFPL4B	1		+
RFX6	1		+
RGPD4	2		+	+
RGSL1	1		+
RHOXF2	1		+
RHOXF2B	1		+
RIMBP3	2		+	+
RIMBP3B	1		+
RIMBP3C	1		+
RNASE11	1		+
RNASE12	1		+
RNASE8	1		+
RNF103-CHMP3	1		+
RNF113B	2		+		+
RNF133	1		+
RNF148	1		+
RNF151	1		+
RNF17	2		+		+
RNF212B	1		+
ROPN1B	3		+	+	+
RPL10L	2		+		+
RSPH10B2	1		+
RSPH6A	2		+		+
S100A7L2	1		+
SAMD7	1		+
SCGB1D1	1		+
SCN10A	1		+
SCP2D1	1		+
SEL1L2	1		+
2021-09-12	1		+
SERINC4	1		+
SERPINA2	1		+
SHCBP1L	2		+		+
SIGLECL1	1		+
SIRPD	1		+
SIX6	1		+
SKA3	2		+	+
SKOR2	2		+			+
SLC25A2	1		+
SLC25A31	1		+
SLC25A52	1		+
SLC26A8	2		+		+
SLC35G4	1		+
SLC36A3	1		+
SLC6A5	2		+			+
SLC9B1	1		+
SLFNL1	1		+
SMC1B	4		+	+	+	+
SMCP	2		+		+
SMIM11B	1		+
SMIM21	1		+
SMIM23	1		+
SOX30	2		+		+
SPACA1	2		+		+
SPACA5B	1		+
SPACA7	1		+
SPAG11A	1		+
SPAG11B	1		+
SPAM1	2		+		+
SPATA12	1		+
SPATA16	2		+		+
SPATA17	1		+
SPATA21	1		+
SPATA22	2		+		+
SPATA3	1		+
SPATA31A1	1		+
SPATA31A3	1		+
SPATA31A5	1		+
SPATA31A6	1		+
SPATA31A7	1		+
SPATA31C1	1		+
SPATA31C2	1		+
SPATA31D1	1		+
SPATA31D3	1		+
SPATA31D4	1		+
SPATA31E1	1		+
SPATA32	1		+
SPATA33	1		+
SPATA4	1		+
SPATA8	1		+
SPATS1	1		+
SPDYE17	1		+
SPDYE4	1		+
SPEM1	1		+
SPERT	2		+		+
SPINK2	2		+		+
SPINT3	1		+
SPINT4	1		+
SPPL2C	2		+		+
SPRR4	1		+
SPZ1	1		+
SSMEM1	1		+
STARD6	1		+
STK31	4		+	+	+	+
STKLD1	1		+
SULT6B1	1		+
SUN3	3		+		+	+
SUN5	1		+
SYCE1L	1		+
SYCE2	2		+		+
SYCE3	1		+
SYCN	1		+
SYCP3	3		+	+	+
SYNGR4	2		+		+
TAAR2	1		+
TAF1L	1		+
TAS2R1	1		+
TBATA	2		+	+
TBC1D21	1		+
TBC1D26	1		+
TBC1D28	1		+
TBC1D3D	1		+
TBC1D3F	1		+
TBC1D3G	1		+
TBC1D3I	1		+
TBC1D3J	1		+
TCEB3C	1		+
TCHHL1	2		+			+
TCP10	1		+
TCP10L2	1		+
TCP11	2		+		+
TCTE3	2		+	+
TDRD12	4		+	+	+	+
TDRD15	1		+
TEX11	2		+		+
TEX13A	1		+
TEX13B	1		+
TEX19	1		+
TEX28	1		+
TEX33	1		+
TEX35	1		+
TEX36	1		+
TEX37	1		+
TEX38	1		+
TEX40	1		+
TEX43	1		+
TGIF2LX	3		+		+	+
TGIF2LY	1		+
TGM7	1		+
THEG5	1		+
TKTL1	4		+	+	+	+
TKTL2	2		+		+
TMCO2	2		+		+
TMCO5A	2		+		+
TMEM202	1		+
TMEM210	1		+
TMEM217	2		+	+
TMEM225	1		+
TMEM239	1		+
TMEM247	1		+
TMEM262	1		+
TMEM31	2		+		+
TMEM89	2		+		+
TMEM95	1		+
TMPRSS11F	1		+
TNP1	1		+
TNP2	1		+
TOPAZ1	1		+
TP53TG3	1		+
TP53TG3B	1		+
TP53TG3C	1		+
TPD52L3	1		+
TPRX1	1		+
TRIM42	2		+		+
TRIM43	1		+
TRIM43B	1		+
TRIM48	1		+
TRIM49	2		+		+
TRIM49B	1		+
TRIM49C	1		+
TRIM49D2	1		+
TRIM51	1		+
TRIM60	1		+
TRIM71	3		+	+	+
TRIML1	2		+		+
TRIML2	2		+	+
TRPC5OS	1		+
TSACC	1		+
TSGA10IP	1		+
TSPAN16	1		+
TSPY1	3		+		+		+
TSPY10	2		+			+
TSPY4	1		+
TSPY8	1		+
TSPYL6	2		+		+
TSSK1B	2		+		+
TSSK2	1		+
TTC21A	1		+
TTC29	2		+		+
TTLL2	2		+		+
TTLL8	1		+
TUBA3C	2		+			+
TUBA3E	1		+
TXNDC2	2		+		+
TXNDC8	1		+
UBE2U	2		+			+
UBL4B	1		+
UBQLN3	1		+
USP26	2		+			+
USP29	1		+
USP50	1		+
UTF1	2		+		+
VCX	3		+		+	+
VCX2	2		+		+
VCX3A	2		+		+
VCX3B	2		+		+
VCY	1		+
VCY1B	1		+
VN1R4	1		+
VN1R5	1		+
VPREB1	1		+
VRTN	2		+	+
WBSCR28	1		+
WDR64	1		+
WDR87	2		+			+
WFDC10A	1		+
WFDC11	1		+
WFDC6	1		+
WFDC9	1		+
XKR3	1		+
YBX2	2		+		+
ZAN	1		+
ZAR1	1		+
ZAR1L	1		+
ZC2HC1B	2		+		+
ZCCHC13	1		+
ZDHHC19	1		+
ZIM3	1		+
ZNF479	1		+
ZNF560	3		+	+		+
ZNF679	2		+			+
ZNF683	2		+	+
ZNF705B	1		+
ZNF705D	1		+
ZNF705G	1		+
ZNF729	1		+
ZNF735	1		+
ZNRF4	2		+		+
ZPBP	2		+		+
ZPBP2	2		+		+
ZSCAN5B	1		+
ZSWIM2	1		+
ADAM6	1			+
ITIH4	1			+
ATP6V0C	1			+
F11R	1			+
ZNF395	1			+
ANG	1			+
PRAP1	1			+
VAMP2	1			+
SNN	1			+
CRIP1	1			+
ZNF358	1			+
L1TD1	2			+	+
UBE2V1	1			+
PSMA2	1			+
MBD3	1			+
NDUFA11	1			+
PIK3R2	1			+
LIN28A	1			+
UQCR11	1			+
TRPM1	1			+
RBM4	1			+
SLIT1	1			+
ACAD11	1			+
NLRP7	1			+
TMED7	1			+
TRAPPC9	1			+
NEDD8	1			+
SOX6	1			+
NUP62	1			+
VKORC1	1			+
RAG1	1			+
ARHGEF18	1			+
NDUFA2	1			+
DDX47	1			+
MEX3A	1			+
TRIM16	1			+
KCNQ1OT1	1			+
TMEM140	1			+
BCKDHA	1			+
ZNF587	1			+
CORO7	1			+
IER3IP1	1			+
TBC1D7	1			+
B3GNT5	1			+
SLC24A5	1			+
DPPA4	1			+
ZNF469	1			+
SLCO4C1	1			+
C11orf96	1			+
FAHD1	1			+
CBX2	1			+
SOGA3	1			+
TATDN2	1			+
COL10A1	1			+
CERS1	1			+
C5orf24	1			+
WDHD1	1			+
ADORA2A	1			+
PPAN	1			+
SLC6A2	1			+
ABCC11	1			+
SEC16B	1			+
ELL3	1			+
RNF169	1			+
NDUFA7	1			+
HMGA2	1			+
SLC45A2	1			+
BBS1	1			+
TRAPPC5	1			+
C21orf59	1			+
LRRC8D	1			+
LSM12	1			+
VPS33A	1			+
ONECUT2	1			+
ZNF264	1			+
CHURC1	1			+
TET1	1			+
CNKSR3	1			+
ACVR2B	1			+
POLR2M	1			+
CRCP	1			+
SARS2	1			+
C19orf25	1			+
ASPM	1			+
SLC4A5	1			+
CDC25A	1			+
SDHAF2	1			+
ZNF410	1			+
RABGEF1	1			+
PLEKHM3	1			+
SIAH1	1			+
BEND3	1			+
TRIQK	1			+
DTL	1			+
LRP1B	1			+
NCAPG2	1			+
IGFLR1	1			+
BIRC5	1			+
HS6ST3	1			+
KIAA1549	1			+
MRPL30	1			+
ISY1	1			+
C17orf80	1			+
DCX	1			+
ZNF460	1			+
RBM34	1			+
ZFP42	1			+
ARHGAP11A	1			+
RAPGEF6	1			+
SCAI	1			+
PTGR2	1			+
C11orf57	1			+
TCEAL1	1			+
LRFN4	1			+
N4BP2	1			+
ZNF646	1			+
SLC16A7	1			+
ZNF70	1			+
LRRC37BP1	1			+
RTEL1	1			+
ATAD5	1			+
ZNF578	1			+
BRCA2	1			+
SOX1	1			+
KIF4A	1			+
FOXO3B	1			+
USP37	1			+
LMX1B	1			+
RAD51	1			+
LYRM5	1			+
CRB1	1			+
FBXO10	1			+
CBWD1	1			+
RBM12B	1			+
SLC35A1	1			+
ZNF490	1			+
TICRR	1			+
PGAM5	1			+
KIF20B	1			+
RPP14	1			+
GTSE1	1			+
NLGN1	1			+
C7orf55	1			+
GDAP2	1			+
ASB3	1			+
GINS1	1			+
BEND4	1			+
ACSM1	1			+
ZNF286A	1			+
RBM7	1			+
CENPE	1			+
KIAA0391	1			+
RAD51AP1	1			+
CEP152	1			+
CENPA	1			+
ZNF714	1			+
GGTLC2	1			+
NEK2	1			+
ERCC6L	1			+
ORC1	1			+
HUNK	1			+
RAD54L	1			+
PAK6	1			+
ZNF43	1			+
FTX	1			+
IGF2BP3	2			+			+
ZNF208	1			+
PCDH15	1			+
POLQ	1			+
RBL1	1			+
ZNF805	1			+
TRIM59	1			+
C1orf226	1			+
STIL	1			+
NHEJ1	1			+
ADAMTS17	1			+
ZNF559	1			+
CHEK1	1			+
EXO1	1			+
ZNF548	1			+
MMS22L	1			+
CLSPN	1			+
LRRC37A2	1			+
ZNF268	1			+
ZNF776	1			+
KIAA1524	1			+
PA2G4P4	1			+
ZNF81	1			+
ARHGAP28	1			+
NAALADL2	1			+
DNAH5	1			+
ALG10B	1			+
C10orf12	1			+
RPP38	1			+
TMEM241	1			+
ZNF668	1			+
HMMR	1			+
GINS4	1			+
CDCA2	2			+	+
KIF15	2			+	+
IBA57	1			+
DEPDC1	1			+
PIPSL	1			+
MED26	1			+
ARL17A	1			+
PLD6	1			+
MRPS17	1			+
FAM175A	1			+
SAC3D1	1			+
ABCA13	1			+
KIF14	1			+
CILP2	1			+
ZNF607	1			+
CCDC152	1			+
SDK2	1			+
MTL5	2			+	+
RPL19P12	1			+
PAPPA	1			+
BLOC1S3	1			+
ZYG11A	1			+
KLK15	1			+
CDKN3	1			+
CCDC18	1			+
PTRH1	1			+
L3MBTL4	1			+
ZNF611	1			+
WDR89	1			+
COL20A1	1			+
SGOL2	2			+	+
CSMD2	1			+
ZNF367	1			+
ZNF525	1			+
METTL21A	1			+
STAG3L1	1			+
TTC30A	1			+
C7orf25	1			+
KIAA1919	1			+
SKA1	1			+
ZNF696	1			+
CLNK	1			+
ZNF227	1			+
KIAA2022	1			+
MCM10	1			+
PLK4	1			+
CCDC113	1			+
CNTLN	1			+
BACH2	1			+
TIGD7	1			+
CSMD3	1			+
FAM188B	1			+
ANKRD36B	1			+
SUV39H2	1			+
CHRNB4	1			+
E2F7	1			+
ZNF626	1			+
DNAJC24	1			+
ZNF407	1			+
CEP128	1			+
GTPBP10	1			+
GPR39	1			+
C16orf59	1			+
PCDHGB2	1			+
SLC22A16	1			+
SCML2	1			+
FMN1	1			+
CDRT4	1			+
TTTY15	1			+
SIM1	1			+
ZNF557	1			+
C17orf53	1			+
SLC38A9	1			+
PCDHB9	1			+
C1orf112	1			+
FBXO5	1			+
ZNF765	1			+
TRDMT1	1			+
ZNF564	1			+
FANCM	1			+
SLC2A14	1			+
AMER1	1			+
VASH2	1			+
S100A7A	1			+
ZNF675	1			+
ZNF169	1			+
ZBTB8A	1			+
HELB	1			+
ZNF430	1			+
YBX3P1	1			+
DIAPH3	2			+	+
TVP23C	1			+
SIGLEC5	1			+
RAG2	1			+
TAF4B	1			+
SLC10A7	1			+
TTC30B	1			+
ZNF229	1			+
ZNF23	1			+
ZKSCAN2	1			+
PRR11	1			+
DEPDC1B	1			+
ENAM	1			+
SPATA5	1			+
TRPV1	1			+
CKAP2L	1			+
LRRC27	1			+
PDP2	1			+
PARPBP	1			+
DNAH9	1			+
CACNA2D4	1			+
PRSS21	2			+	+
RGPD3	1			+
TMPPE	1			+
BRIP1	1			+
SPC25	1			+
ZDHHC15	1			+
CENPK	1			+
PCDHB2	1			+
F2RL2	1			+
GSTCD	1			+
IL12RB2	1			+
MYO16	1			+
KIF18A	1			+
ZNF681	1			+
CHRNA5	1			+
SPTA1	1			+
POLE2	1			+
FBXL19-AS1	1			+
NOTUM	1			+
NRG1	1			+
TMEM194B	1			+
ZNF85	1			+
TNFSF4	1			+
DNAJC5B	1			+
MIR17HG	1			+
WNT7A	1			+
ZNF701	1			+
SPDYE3	1			+
EME1	1			+
RAD54B	1			+
ZNF788	1			+
CENPO	1			+
ZNF93	1			+
ZNF845	1			+
ZNF280C	1			+
ZNF749	1			+
C9orf85	1			+
NCKAP5	1			+
SPRN	1			+
DLEU2	1			+
MSL3P1	1			+
SPDYE1	1			+
AK9	1			+
MGAT4C	1			+
ZNF702P	1			+
ALG10	1			+
MPL	1			+
WDR92	1			+
DPH6	1			+
DNAH11	1			+
ESCO2	1			+
LINC00476	1			+
UQCRBP1	1			+
C16orf87	1			+
TIPIN	1			+
ZNF280B	1			+
ZNF676	1			+
ATP5EP2	1			+
CCDC144A	1			+
CENPL	1			+
KIF9	1			+
ZNF610	1			+
C18orf54	1			+
KIAA1328	1			+
RPL23P8	1			+
XRCC2	1			+
DPY19L2P2	1			+
MFSD2B	1			+
ERCC8	1			+
MND1	1			+
CDC25C	1			+
TIRAP	1			+
CEP57L1	1			+
ZNF425	1			+
DNAH2	1			+
ZNF124	1			+
GP1BA	1			+
ARHGAP11B	1			+
KCNA3	1			+
WDPCP	1			+
KRTAP5-8	1			+
INSRR	1			+
SGOL1	1			+
DTWD2	1			+
PTPRQ	1			+
CCSER1	1			+
TMPO-AS1	1			+
ZNF546	1			+
CCDC173	1			+
CCDC170	1			+
RPL23AP53	1			+
MTFR2	1			+
CENPP	1			+
CBWD6	1			+
PABPC4L	1			+
ZNF619	1			+
RFX8	1			+
FAM19A3	1			+
NLRP9	1			+
ZBTB3	1			+
C12orf66	1			+
CYB5RL	1			+
ZNF813	1			+
STXBP4	1			+
EDAR	1			+
ZNF483	1			+
PPIEL	1			+
FOXD1	1			+
C9orf84	1			+
LINC00852	1			+
ZNF709	1			+
ZNF782	1			+
C10orf25	1			+
NSUN3	1			+
ART5	1			+
ZNF799	1			+
ZNF717	1			+
CXCL11	1			+
ZNF543	1			+
PAPPA2	1			+
ZRANB3	1			+
ZBTB20	1			+
MYH15	1			+
WDR78	1			+
ZNF527	1			+
FAM225B	1			+
SLC24A4	1			+
SYT14	1			+
NEIL3	1			+
PDE11A	1			+
KLHL11	1			+
C20orf197	1			+
MAP10	1			+
BPIFA1	1			+
TSSK3	1			+
MIPOL1	1			+
DLEU1	1			+
DNAH14	1			+
ZNF501	1			+
RNF183	1			+
ZFP37	1			+
ZNF257	1			+
ZKSCAN3	1			+
LCORL	1			+
GDF6	1			+
ANO2	1			+
ZNF669	1			+
CCDC150	1			+
PRKY	1			+
ZNF492	1			+
ZNF2	1			+
GUSBP2	1			+
TRMT10A	1			+
GPR89B	1			+
LIPT1	1			+
ZNF718	1			+
ZNF660	1			+
ZNF324B	1			+
SLC44A5	1			+
DGKH	1			+
ZNF790	1			+
CCDC138	1			+
GDF5	1			+
ZNF568	1			+
CCDC171	1			+
ZNF677	1			+
ZNF112	1			+
ZBTB37	1			+
ZFP69	1			+
MSTN	1			+
GRM8	1			+
ATP6AP1L	1			+
UMODL1	1			+
CCDC15	1			+
ZNF571	1			+
ZNF230	1			+
MDGA2	1			+
DNAH8	2			+	+
FAM122C	1			+
LINC00472	1			+
ZNF678	1			+
ARRDC5	2			+	+
ZNF763	1			+
LRAT	1			+
RIBC2	1			+
BMS1P4	1			+
ZNF98	1			+
M1AP	1			+
ZNF583	1			+
ZNF573	1			+
CLUL1	1			+
MRS2P2	1			+
DNAH7	1			+
AK7	1			+
ANXA2P3	1			+
ATG10	1			+
ADAMTS6	1			+
C3orf67	1			+
MED12L	1			+
KCNMB2	1			+
PGBD4	1			+
C5orf34	1			+
IKZF3	1			+
SYT10	1			+
ZNF19	1			+
MYO3A	1			+
WNK3	1			+
UBE3D	1			+
ZNF670	1			+
DNASE2B	1			+
PLEKHA8P1	1			+
POTEM	1			+
ZNF572	1			+
ZNF778	1			+
CHRNA7	1			+
RANBP17	1			+
C8orf37	1			+
PCDHGB1	1			+
ZNF624	1			+
PCDHA10	1			+
TAF1A	1			+
HLA-L	1			+
CLEC12B	2			+	+
STEAP1B	1			+
BTBD18	1			+
DNAJB13	1			+
GRIN3A	1			+
HILS1	1			+
RPLP0P2	1			+
ESPNL	1			+
RAD51B	1			+
PCDHB13	1			+
FAM78B	1			+
FAM86JP	1			+
ZNF555	1			+
ZNRD1-AS1	1			+
ZNF713	1			+
HSPA1L	1			+
ZNF876P	1			+
ZNF879	1			+
USP49	1			+
BEAN1	1			+
ZNF225	1			+
ASXL3	1			+
USP51	1			+
TMEM14E	1			+
ITPRIPL1	1			+
DUSP19	1			+
PKD1L1	1			+
ZNF565	1			+
SVOPL	1			+
ANKAR	1			+
CCL17	1			+
DNAH10	1			+
TDRD5	2			+	+
LACE1	1			+
KCNK13	1			+
PRKG2	1			+
BFSP1	1			+
ZSCAN5A	1			+
SEC14L1P1	1			+
RAD9B	1			+
PRR19	1			+
EFCAB11	1			+
CASC2	1			+
FAM66C	1			+
CHRM3	1			+
CENPI	1			+
CCDC7	1			+
PCDHA6	1			+
KCNMB3	1			+
APLF	1			+
HTR7	1			+
ALK	1			+
KCNJ14	1			+
ZNF223	1			+
ZNF233	1			+
ZNF215	1			+
RHPN1-AS1	1			+
PIN4P1	1			+
SOX3	1			+
C17orf67	1			+
ZNF221	1			+
C22orf34	1			+
PCDHGA4	1			+
WDR49	1			+
PCDHGA1	1			+
IL7	1			+
MYO3B	1			+
C1QL4	1			+
UCN2	1			+
OOEP	1			+
RPL21P44	1			+
ZNF485	1			+
ATP6V1E2	1			+
TCAM1P	1			+
FOXP3	1			+
LHX9	1			+
LIPT2	1			+
FAM35DP	1			+
TMPRSS9	1			+
FSIP1	2			+	+
LINC00662	1			+
RGR	1			+
GMNC	1			+
CD101	1			+
SKIDA1	1			+
CDKL3	1			+
NRL	1			+
ZNF597	1			+
SENP8	1			+
ZNF716	2			+		+
SLX4IP	1			+
HARBI1	1			+
IRAK1BP1	1			+
METTL20	1			+
TTLL9	1			+
ASB14	1			+
KCNH5	1			+
FAM90A1	1			+
PCDHA3	1			+
ZNF570	1			+
RIIAD1	1			+
FRMPD1	2			+	+
ZNF620	1			+
TNFSF11	1			+
CCDC73	1			+
SYN3	1			+
ESR2	1			+
RNF32	1			+
ZFHX4-AS1	1			+
CCDC122	1			+
PPP1R2P3	1			+
USH2A	1			+
FAM186B	1			+
ZNF284	1			+
SLC6A10P	1			+
KIAA1210	2			+	+
IQUB	2			+	+
LINC00638	1			+
KTN1-AS1	1			+
ZNF311	1			+
OTUD7A	1			+
TECTA	1			+
ZNF214	1			+
C12orf60	2			+	+
CCT6B	1			+
ACOXL	1			+
C5orf63	1			+
DCHS2	1			+
CCDC148	1			+
DMC1	2			+	+
KIF6	1			+
ZXDA	1			+
FER1L6	1			+
GK3P	1			+
EFCAB6	1			+
PCDHB6	1			+
ZSCAN20	1			+
FAM72A	1			+
ZSCAN23	1			+
GABRG3	1			+
ZNF391	1			+
ZNF774	1			+
ACTRT3	1			+
ZNF815P	1			+
ABCA4	1			+
PCDHB3	1			+
MLLT4-AS1	1			+
TRPM3	1			+
IQCH	1			+
KIAA0825	1			+
NME9	1			+
LINC00654	1			+
CCDC89	1			+
SAMD3	1			+
KDM4D	1			+
SYCP2L	1			+
DNAJC28	1			+
PRPH2	1			+
C7orf57	1			+
GATC	1			+
TACC3	1				+
MSH4	1				+
ASB9	1				+
CBLN1	1				+
DDX25	1				+
WDR69	1				+
HSD17B3	1				+
TPTE2	1				+
CAPN11	1				+
ROPN1L	1				+
PNLDC1	1				+
TEX12	1				+
OLAH	1				+
SRSF12	1				+
2021-09-13	1				+
AQP5	1				+
C16orf73	1				+
CCDC67	1				+
C11orf85	1				+
MYO1H	1				+
SPACA4	1				+
RBM44	1				+
AC018682.6	1				+
PNMA5	1				+
DCAF12L1	1				+
CDKL4	1				+
TCP10L	1				+
AURKC	1				+
CCDC147	1				+
2021-09-11	1				+
FAM81B	1				+
CCDC135	1				+
LRRC71	1				+
CLPB	1				+
PENK	1				+
STAG3	1				+
NKX2-8	1				+
HEMGN	1				+
TEX30	1				+
PHOSPHO1	1				+
C15orf55	1				+
C7orf61	1				+
RPA4	1				+
CCNA1	1				+
TXNDC3	1				+
C9orf11	1				+
TEKT3	1				+
TSKS	1				+
C17orf47	1				+
RPGRIP1	1				+
IZUMO4	1				+
SPATA9	1				+
CCDC158	1				+
ZMYND10	1				+
RHOXF1	1				+
CASC1	1				+
CCDC65	1				+
DNAAF1	1				+
CHODL	1				+
ARMC4	1				+
SYCP2	1				+
C2orf77	1				+
HEATR7B2	1				+
BCL2L14	1				+
ATP1A4	1				+
TEKT4	1				+
C16orf71	1				+
MLF1	1				+
ATPAF1-AS1	1				+
KIAA1211	1				+
FAM83F	1				+
UBE2S	1				+
[truncated: 63 more rows]
