# Supplementary material for: Soluble HLA peptidome of pleural effusions is a valuable source for tumor antigens
Source: HighWire-hosted journal article supplement (doi:10.1136/jitc-2021-003733), 2022-05-01
Supplement: jitc-2021-003733supp008_data_supplement.xlsx [file jitc-2021-003733supp008_data_supplement.xlsx]

## Sheet: Sheet1
Supplementary Table S8. HLA-B*35:02 ligands from Patient 13 that were used for selection for immunogenicity assay.
Sequence	Gene names	Protein names	Typing	Min. rank	Length	Tumor antigen	IEDB score	Tested for immunogenic reaction
LPAWEERETIL	DHX57	Putative ATP-dependent RNA helicase DHX57	HLA-B35:02	1.7153	11		0.68576	+
LPTEEEWEF	SUMF2	Sulfatase-modifying factor 2	HLA-B35:02	0.0932	9		0.55054
FPYDEIETEAVL	EXT2	Exostosin-2	HLA-B35:02	0.092	12		0.53491
VPDEETIFHAL	KLHL1;KLHL4	Kelch-like protein 4;Kelch-like protein 1	HLA-B35:02	0.2036	11		0.53321
MPAPEEIVEEL	MKI67	Antigen KI-67	HLA-B35:02	0.0932	11		0.508
HPDIFIEHF	DEPDC7	DEP domain-containing protein 7	HLA-B35:02	0.1005	9		0.4838
DAFAEWTEM	WLS	Protein wntless homolog	HLA-B35:02	0.1098	9		0.47464
MPAFIFEHI	SDCBP	Syntenin-1	HLA-B35:02	0.1301	9		0.4737
TAVIWEPVL	CORO7-PAM16;CORO7	Coronin;Coronin-7	HLA-B35:02	0.6133	9	Bruggeman et al., 2018	0.47203
LPQWEVEEL	GYS2	Glycogen [starch] synthase, liver	HLA-B35:02	0.0387	9		0.46465
MPEWIGGESEL	JOSD1	Josephin-1	HLA-B35:02	0.1843	11		0.46412
FPGFEIETV	ASNS	Asparagine synthetase [glutamine-hydrolyzing]	HLA-B35:02	0.0866	9		0.45876
FPEEVIATIF	INSIG1	Insulin-induced gene protein;Insulin-induced gene 1 protein	HLA-B35:02	0.0725	10		0.4504
FPATIWLFL	SLC10A7	Sodium/bile acid cotransporter 7	HLA-B35:02	0.0835	9	Bruggeman et al., 2018	0.44891	+
VPVEEEEEL	SETD2	Histone-lysine N-methyltransferase SETD2	HLA-B35:02	0.0198	9		0.4489
LPAEFFEVL	NUP210	Nuclear pore membrane glycoprotein 210	HLA-B35:02	0.0085	9		0.44627
SVAEIEEAL	MOAP1	Modulator of apoptosis 1	HLA-B35:02	0.3507	9		0.44466
IPFGITEEAM	U2AF2	Splicing factor U2AF 65 kDa subunit	HLA-B35:02	0.0873	10		0.44111
FPHTEEEVEV	PLXDC2	Plexin domain-containing protein 2	HLA-B35:02	0.2945	10		0.43215
DAAIEEVEM	YLPM1	YLP motif-containing protein 1	HLA-B35:02	0.1209	9		0.43171
LPIDVTEGEVISL	PTBP1	Polypyrimidine tract-binding protein 1	HLA-B35:02	0.2601	13		0.42604
LPPDITEEEM	NONO	Non-POU domain-containing octamer-binding protein	HLA-B35:02	0.2169	10		0.42337
MPAEEFREL	SETD6	N-lysine methyltransferase SETD6	HLA-B35:02	0.003	9		0.42333
LPPGEWEL	C1orf106	Uncharacterized protein C1orf106	HLA-B35:02	0.3486	8		0.42101
LPEEIREPAL	NSL1	Kinetochore-associated protein NSL1 homolog	HLA-B35:02	0.1136	10		0.421
IPEFIIPTL	APOB	Apolipoprotein B-100;Apolipoprotein B-48	HLA-B35:02	0.011	9		0.4185
FPDWREDVL	FRYL	Protein furry homolog-like	HLA-B35:02	0.0096	9		0.41758
SPAEFFELM	PGS1	CDP-diacylglycerol--glycerol-3-phosphate 3-phosphatidyltransferase, mitochondrial	HLA-B35:02	0.0186	9		0.41567
FPETEFIAV	TBX3	T-box transcription factor TBX3	HLA-B35:02	0.0205	9		0.41444
IPVHEEFIL	LDAH;FLJ21820;C2orf43	UPF0554 protein C2orf43	HLA-B35:02	0.0374	9		0.41426
LPEEEHEFF	CNOT8	CCR4-NOT transcription complex subunit 8	HLA-B35:02	0.1545	9		0.4141
EPDPEFEAIL	SPTAN1	Spectrin alpha chain, non-erythrocytic 1	HLA-B35:02	0.1426	10		0.41257
SAIIFETPL	EIF4G1	Eukaryotic translation initiation factor 4 gamma 1	HLA-B35:02	0.7461	9		0.41165
SPNEEAFIL	CEP295	Centrosomal protein of 295 kDa	HLA-B35:02	0.0105	9		0.40954
HPEETEEEL	HDAC5;HDAC4	Histone deacetylase 5;Histone deacetylase 4	HLA-B35:02	0.0189	9		0.4083
QAFIGEEVL	ATF6B	Cyclic AMP-dependent transcription factor ATF-6 beta;Processed cyclic AMP-dependent transcription factor ATF-6 beta	HLA-B35:02	0.2902	9		0.40779
FPHFEITTM	BCORL1	BCL-6 corepressor-like protein 1	HLA-B35:02	0.0027	9		0.40652
YPDEIEYIF	VEGFA	Vascular endothelial growth factor A	HLA-B35:02	0.0044	9		0.40644
RPVEEFEL	CIT	Citron Rho-interacting kinase	HLA-B35:02	0.4791	8		0.40635
VPIIFADEL	DAG1	Dystroglycan;Alpha-dystroglycan;Beta-dystroglycan	HLA-B35:02	0.0305	9		0.40517
IPNEIIHAL	HNRNPM	Heterogeneous nuclear ribonucleoprotein M	HLA-B35:02	0.0016	9		0.40369
LPVEEEAVTL	TNKS1BP1	182 kDa tankyrase-1-binding protein	HLA-B35:02	0.0436	10		0.4035
EAFVWEPAM	CCT7	T-complex protein 1 subunit eta	HLA-B35:02	0.2078	9		0.40299
LPVEEFNELL	NFE2L1	Nuclear factor erythroid 2-related factor 1	HLA-B35:02	0.1396	10		0.39758
FPAEDWAGL	SHFM1	26S proteasome complex subunit DSS1	HLA-B35:02	0.0051	9		0.39638
EPIVENGETEM	GSPT1	Eukaryotic peptide chain release factor GTP-binding subunit ERF3A	HLA-B35:02	0.6965	11		0.39445
RPVEEIVTF	MPI	Mannose-6-phosphate isomerase	HLA-B35:02	0.0441	9		0.39445
HPAEDTEGTEF	CENPF	Centromere protein F	HLA-B35:02	0.2952	11		0.39351
SPEEEEPIL	FRMD8;FRMD8P1	FERM domain-containing protein 8;Putative FERM domain-containing protein FRMD8P1	HLA-B35:02	0.0413	9		0.3934
LPLAEDITNIL	GC	Vitamin D-binding protein	HLA-B35:02	0.3733	11		0.39331
LADGIFETL	CEP350	Centrosome-associated protein 350	HLA-B35:02	0.1727	9		0.38828
TPVGTEEEVM	TPR	Nucleoprotein TPR	HLA-B35:02	0.292	10		0.38567
APAEDPVFTIL	C19orf25	UPF0449 protein C19orf25	HLA-B35:02	0.6132	11	Bruggeman et al., 2018	0.38517	+
QADEVIAIL	LEPREL1	Prolyl 3-hydroxylase 2	HLA-B35:02	0.1204	9		0.38421
EPAFEDITL	PRPF40A	Pre-mRNA-processing factor 40 homolog A	HLA-B35:02	0.013	9		0.38388
HPVEEEDEL	USO1	General vesicular transport factor p115	HLA-B35:02	0.0085	9		0.38312
EPAAEIEAL	SCRN1	Secernin-1	HLA-B35:02	0.0151	9		0.38221
LPDPIIIHL	VPS13B	Vacuolar protein sorting-associated protein 13B	HLA-B35:02	0.0048	9		0.38214
LPIDVTEGEVI	PTBP1	Polypyrimidine tract-binding protein 1	HLA-B35:02	0.5191	11		0.38154
HAIETEEGL	JADE3;JADE1	Protein Jade-3;Protein Jade-1	HLA-B35:02	0.2599	9		0.3803
DPHEREFVI	SMARCD1	SWI/SNF-related matrix-associated actin-dependent regulator of chromatin subfamily D member 1	HLA-B35:02	0.2259	9		0.37882
SPKERIIEY	FTCD	Formimidoyltransferase-cyclodeaminase;Glutamate formimidoyltransferase;Formimidoyltetrahydrofolate cyclodeaminase	HLA-B35:02	0.4925	9		0.37725
QPICWEELL	STRIP2	Striatin-interacting protein 2	HLA-B35:02	0.3383	9		0.37692
TPHDFIEHF	CCND1	G1/S-specific cyclin-D1	HLA-B35:02	0.0953	9		0.3755
LPVEEFNEL	NFE2L1	Nuclear factor erythroid 2-related factor 1	HLA-B35:02	0.0035	9		0.37489
YPFIIDAHL	TEX10	Testis-expressed sequence 10 protein	HLA-B35:02	0.0075	9		0.37432
LPADITEDEF	SFPQ	Splicing factor, proline- and glutamine-rich	HLA-B35:02	0.1219	10		0.37389
TAAENEFVVL	KRT7;KRT79;KRT72	Keratin, type II cytoskeletal 7;Keratin, type II cytoskeletal 79;Keratin, type II cytoskeletal 72	HLA-B35:02	1.0886	10		0.37381
FAAFEEPEL	EPHX1	Epoxide hydrolase 1	HLA-B35:02	0.1978	9		0.37139
LPAVFEEVL	MVP	Major vault protein	HLA-B35:02	0.0306	9		0.37111
IPLEEGELEL	AIM1	Absent in melanoma 1 protein	HLA-B35:02	0.1086	10		0.37104
IPNEETILNAL	KLHL5	Kelch-like protein 5	HLA-B35:02	0.2077	11		0.37051
EAEIAHIAL	FLOT1	Flotillin-1	HLA-B35:02	0.0961	9		0.37015
RPEEGFVEL	TSEN54	tRNA-splicing endonuclease subunit Sen54	HLA-B35:02	0.0336	9		0.36979
NAFDIAEEL	MBD3	Methyl-CpG-binding domain protein 3	HLA-B35:02	0.0348	9	Bruggeman et al., 2018	0.36975
NPDREGWLL	CYTH1;CYTH2;CYTH4;CYTH3	Cytohesin-1;Cytohesin-2;Cytohesin-4;Cytohesin-3	HLA-B35:02	0.0452	9		0.36914
FPIIDDRNREL	PRDX6	Peroxiredoxin-6	HLA-B35:02	0.2348	11		0.36681
HPVEESIIIP	TRAFD1	TRAF-type zinc finger domain-containing protein 1	HLA-B35:02	1.7945	10		0.36591
TAVAVFEIL	C11orf80	Uncharacterized protein C11orf80	HLA-B35:02	0.6065	9		0.36543
APDAFDIVAM	IQGAP3	Ras GTPase-activating-like protein IQGAP3	HLA-B35:02	0.1237	10		0.36515
SPNAEIHIL	KIF22	Kinesin-like protein;Kinesin-like protein KIF22	HLA-B35:02	0.0197	9		0.36511
APTDIEEGM	PSMC2	26S protease regulatory subunit 7	HLA-B35:02	0.1188	9		0.36307
HIAEEEAVM	NBR1	Next to BRCA1 gene 1 protein	HLA-B35:02	0.3728	9		0.36234
FPLEAVREDAF	MBOAT7	Lysophospholipid acyltransferase 7	HLA-B35:02	0.3272	11		0.36168
VPELEEVARVL	PPP1R13L	RelA-associated inhibitor	HLA-B35:02	1.264	11		0.36117
LPAEEEATL	RLTPR	Leucine-rich repeat-containing protein 16C	HLA-B35:02	0.0034	9		0.3609
QPFREAIAL	C16orf72	UPF0472 protein C16orf72	HLA-B35:02	0.0174	9		0.35959
TPVEEVEAL	LARP4B	La-related protein 4B	HLA-B35:02	0.0034	9		0.35787
YPVEIHEYL	C1D	Nuclear nucleic acid-binding protein C1D	HLA-B35:02	0.0023	9		0.35654
EPIENGETEM	GSPT1		HLA-B35:02	0.1145	10		0.35616
TAAEEAEAL	MACF1	Microtubule-actin cross-linking factor 1, isoforms 1/2/3/5	HLA-B35:02	0.1017	9		0.35514
TPETEETEM	PRKD1	Serine/threonine-protein kinase;Serine/threonine-protein kinase D1	HLA-B35:02	0.0981	9		0.35457
FPGEAERVAF	LDOC1L	Protein LDOC1L	HLA-B35:02	0.0958	10		0.35377
YPQENIIDTF	NMT1	Glycylpeptide N-tetradecanoyltransferase 1	HLA-B35:02	0.0341	10		0.35313
FPGPFEEEM	ASAH1	Acid ceramidase;Acid ceramidase subunit alpha;Acid ceramidase subunit beta	HLA-B35:02	0.0078	9		0.35109
MIIEDETEF	CMTR1	Cap-specific mRNA (nucleoside-2-O-)-methyltransferase 1	HLA-B35:02	0.3482	9		0.35106
QPERDWVL	DDX17	Probable ATP-dependent RNA helicase DDX17	HLA-B35:02	1.1441	8		0.34953
AATTVEEIL	TNKS1BP1	182 kDa tankyrase-1-binding protein	HLA-B35:02	1.7121	9		0.34837
VPFPFDETEL	FAM91A1;LINC00869	Protein FAM91A1;Putative uncharacterized protein encoded by LINC00869	HLA-B35:02	0.0943	10		0.34795
LPDTTGEIVL	IGKV3D-11	Ig kappa chain V-III region VG;Ig kappa chain V-III region B6	HLA-B35:02	0.0781	10		0.34775
LPDTTGEIVM	IGKV3D-15;IGKV3OR2-268;IGKV3D-7	Ig kappa chain V-III region POM	HLA-B35:02	0.0744	10		0.34775
FPEIPVEFL	HTT	Huntingtin	HLA-B35:02	0.0215	9		0.34738
TAAERDEIL	CHCHD7	Coiled-coil-helix-coiled-coil-helix domain-containing protein 7	HLA-B35:02	0.3966	9		0.34699
FPETTEEEL	STRAP	Serine-threonine kinase receptor-associated protein	HLA-B35:02	0.0091	9		0.34661
FPAEDEFPDL	CKB	Creatine kinase B-type	HLA-B35:02	0.0887	10		0.34635
HPDEFGFLL	PLXNA3	Plexin-A3	HLA-B35:02	0.0064	9		0.34617
FPSADEIIIKM	KDM7A	Lysine-specific demethylase 7A	HLA-B35:02	0.1973	11		0.34597
LPEEEEYAL	KDM5A	Lysine-specific demethylase 5A	HLA-B35:02	0.0062	9		0.34474
FPTIVERGL	ASNA1	ATPase ASNA1	HLA-B35:02	0.041	9		0.34445
LPEFVEPFL	PRPF8	Pre-mRNA-processing-splicing factor 8	HLA-B35:02	0.0926	9		0.34379
FVVEHDFIM	ABCE1	ATP-binding cassette sub-family E member 1	HLA-B35:02	0.2768	9		0.34309
MPIREGDTVTL	CD22	B-cell receptor CD22	HLA-B35:02	0.0547	11		0.34144
SAVDFIRTL	STK17A	Serine/threonine-protein kinase 17A	HLA-B35:02	0.1527	9		0.34136
FPIAEVFTL	HLA-DMA	Beta-2-microglobulin;HLA class II histocompatibility antigen, DM alpha chain	HLA-B35:02	0.0029	9		0.34041
YPEEAYIADL	ACLY	ATP-citrate synthase	HLA-B35:02	0.0344	10		0.33901
DAIREVETL	UTRN	Utrophin	HLA-B35:02	0.1647	9		0.33882
EPLEEAETL	ZNF445	Zinc finger protein 445	HLA-B35:02	0.0174	9		0.33866
HPDAFDNELIL	UCK2	Uridine-cytidine kinase 2	HLA-B35:02	0.1479	11		0.33852
IPEEAGITM	AMPD2	AMP deaminase 2	HLA-B35:02	0.003	9		0.33825
YPNERFELL	UBXN7	UBX domain-containing protein 7	HLA-B35:02	0.0069	9		0.33727
FIQEIEHAL	EXOC4	Exocyst complex component 4	HLA-B35:02	0.1787	9		0.33716
EPDGIPFIL	ARHGAP29	Rho GTPase-activating protein 29	HLA-B35:02	0.0153	9		0.33702
HPEEGVVAEL	CMTM5	CKLF-like MARVEL transmembrane domain-containing protein 5	HLA-B35:02	0.0333	10		0.33683
TAGIVEAVL	TRAPPC5	Trafficking protein particle complex subunit 5	HLA-B35:02	0.8437	9	Bruggeman et al., 2018	0.33651
VPVEEPIAF	DAPK1	Death-associated protein kinase 1	HLA-B35:02	0.0092	9		0.33639
FPDEDEIL	EIF2S2	Eukaryotic translation initiation factor 2 subunit 2	HLA-B35:02	0.1363	8		0.33612
EPDVFAIAP	AAK1	Uncharacterized protein FLJ45252	HLA-B35:02	1.759	9		0.33475
HPDEPIII	SNRNP40;DKFZp434D199	U5 small nuclear ribonucleoprotein 40 kDa protein	HLA-B35:02	0.2652	8		0.33475
TPLPEEFEL	SMG7	Protein SMG7	HLA-B35:02	0.015	9		0.33429
YPEGFEIHSM	ACSL4	Long-chain-fatty-acid--CoA ligase 4	HLA-B35:02	0.032	10		0.33402
IPVPEDIGHAL	CNTN2	Contactin-2	HLA-B35:02	0.0816	11		0.333
SPTHREEEY	FLG	Filaggrin	HLA-B35:02	1.1359	9		0.3328
FPHHGTFEVI	MED17	Mediator of RNA polymerase II transcription subunit 17	HLA-B35:02	0.283	10		0.33267
HPEYEERFL	OLFML2B	Olfactomedin-like protein 2B	HLA-B35:02	0.1414	9		0.33261
IPTEEAEM	TMF1	TATA element modulatory factor	HLA-B35:02	0.3573	8		0.33218
NPEENEAIA	SFTPA1;SFTPA2	Pulmonary surfactant-associated protein A1;Pulmonary surfactant-associated protein A2	HLA-B35:02	0.8237	9		0.33198
MIHEVEHEM	SPICE1	Spindle and centriole-associated protein 1	HLA-B35:02	0.2168	9		0.3315
YPEDFAIDL	XRN2	5-3 exoribonuclease 2	HLA-B35:02	0.0069	9		0.33093
IPYFRDEEL	SERPINA3	Alpha-1-antichymotrypsin;Alpha-1-antichymotrypsin His-Pro-less	HLA-B35:02	0.0233	9		0.33088
YPVEDFEA	FRYL;FRY	Protein furry homolog-like;Protein furry homolog	HLA-B35:02	0.6932	8		0.33045
NPYEGRVEVL	LOXL2	Lysyl oxidase homolog 2	HLA-B35:02	0.049	10		0.33043
LPDIENEDF	GLIPR1	Glioma pathogenesis-related protein 1	HLA-B35:02	0.3023	9		0.32999
FPFTREEAL	UBR4	E3 ubiquitin-protein ligase UBR4	HLA-B35:02	0.0037	9		0.32907
TPIAETIM	TMPO	Lamina-associated polypeptide 2, isoforms beta/gamma;Thymopoietin;Thymopentin	HLA-B35:02	0.2676	8		0.32893
QAEEREHTL	TRIOBP	TRIO and F-actin-binding protein	HLA-B35:02	0.4394	9		0.32788
EADGAAWVL	PDCD7	Programmed cell death protein 7	HLA-B35:02	0.0505	9		0.32729
GPDDFIVAM	GGT7	Gamma-glutamyltransferase 7;Gamma-glutamyltransferase 7 heavy chain;Gamma-glutamyltransferase 7 light chain	HLA-B35:02	0.0091	9		0.3265
IPADIVFVL	DNAJB1;DNAJB5	DnaJ homolog subfamily B member 1;DnaJ homolog subfamily B member 5	HLA-B35:02	0.0033	9		0.3264
AVIEAEHTL	DHX9	ATP-dependent RNA helicase A	HLA-B35:02	0.3363	9		0.32628
RPEEIAALL	SKIV2L	Helicase SKI2W	HLA-B35:02	0.0495	9		0.32622
HPEWGDEQL	PTGS2	Prostaglandin G/H synthase 2	HLA-B35:02	0.055	9		0.32609
FPAAIEHTI	UBA6	Ubiquitin-like modifier-activating enzyme 6	HLA-B35:02	0.0036	9		0.3259
YPEIEEVQAL	DUT	Deoxyuridine 5-triphosphate nucleotidohydrolase, mitochondrial	HLA-B35:02	0.0089	10		0.32538
LPDFFLPEAM	THADA	Thyroid adenoma-associated protein	HLA-B35:02	0.2654	10		0.32512
NVIEVEHHL	LOXL3	Lysyl oxidase homolog 3	HLA-B35:02	0.2669	9		0.3246
TAAENEFVV	KRT7;KRT79;KRT72	Keratin, type II cytoskeletal 7;Keratin, type II cytoskeletal 79;Keratin, type II cytoskeletal 72	HLA-B35:02	0.4028	9		0.32432
EPVEEDAEM	NDNL2	Melanoma-associated antigen G1	HLA-B35:02	0.0243	9		0.32405
SPENEEHIL	RPTOR	Regulatory-associated protein of mTOR	HLA-B35:02	0.0951	9		0.3228
FPRHIEPEL	CCZ1;CCZ1B	Vacuolar fusion protein CCZ1 homolog;Vacuolar fusion protein CCZ1 homolog B	HLA-B35:02	0.0174	9		0.32234
TATLIEDIL	TRPC4AP	Short transient receptor potential channel 4-associated protein	HLA-B35:02	0.901	9		0.32177
LPLEEETL	LAMB3	Laminin subunit beta-3	HLA-B35:02	0.2949	8		0.32166
LPIEDRETI	PPP2R1B	Serine/threonine-protein phosphatase 2A 65 kDa regulatory subunit A beta isoform	HLA-B35:02	0.0197	9		0.32145
DPSGEWVL	FURIN	Furin	HLA-B35:02	0.7664	8		0.32125
NVDEVGGEAL	HBB	Hemoglobin subunit beta;LVV-hemorphin-7;Spinorphin	HLA-B35:02	1.2751	10		0.32041
VPAWDHTL	HECTD3	E3 ubiquitin-protein ligase HECTD3	HLA-B35:02	0.2351	8		0.3204
TPDFTDIVL	LRP5;LRP6	Low-density lipoprotein receptor-related protein 6;Low-density lipoprotein receptor-related protein 5	HLA-B35:02	0.0077	9		0.32012
FPNVEIVTI	BCOR	BCL-6 corepressor	HLA-B35:02	0.0073	9		0.31974
LPEDEGHTRTL	BRD7	Bromodomain-containing protein 7	HLA-B35:02	0.313	11		0.31972
IPDATGRLEIL	VCP	Transitional endoplasmic reticulum ATPase	HLA-B35:02	0.7415	11		0.31959
LPFAEAEAF	MAP7D1	MAP7 domain-containing protein 1	HLA-B35:02	0.0191	9		0.31906
LPDLEGRTHIF	PSMC2	26S protease regulatory subunit 7	HLA-B35:02	1.0941	11		0.31854
FPEHIFPAL	ACTR2	Actin-related protein 2	HLA-B35:02	0.0044	9		0.31835
QIIEEDAAL	BRIX1	Ribosome biogenesis protein BRX1 homolog	HLA-B35:02	0.507	9		0.31821
EPDTEVITV	BCL2L13	Bcl-2-like protein 13	HLA-B35:02	0.0383	9		0.31762
RPEEDAAALEL	PTRF	Polymerase I and transcript release factor	HLA-B35:02	1.0284	11		0.31702
NPIEDEAVI	NSUN2	tRNA (cytosine(34)-C(5))-methyltransferase	HLA-B35:02	0.0224	9		0.31694
LPSITTEIL	PHB	Prohibitin	HLA-B35:02	0.0357	9		0.31682
LDQEGHIIL	MGA	MAX gene-associated protein	HLA-B35:02	1.9204	9		0.31668
HPVAERLDILM	RRN3	RNA polymerase I-specific transcription initiation factor RRN3	HLA-B35:02	0.5044	11		0.31659
IAAGETIAL	IFRD2	Interferon-related developmental regulator 2	HLA-B35:02	0.0804	9		0.31602
DAIRDAEIL	ANXA7	Annexin A7	HLA-B35:02	0.2852	9		0.31597
LPDIFEAQI	KRT7	Keratin, type II cytoskeletal 7	HLA-B35:02	0.1159	9		0.31471
VPATITDIF	CYP1B1	Cytochrome P450 1B1	HLA-B35:02	0.056	9		0.31438
SPDFGDIAV	CANT1	Soluble calcium-activated nucleotidase 1	HLA-B35:02	0.0273	9		0.31406
FPGIEVTV	RNASEH2A	Ribonuclease H2 subunit A	HLA-B35:02	0.3789	8		0.31404
VPDPFFVEL	THADA	Thyroid adenoma-associated protein	HLA-B35:02	0.0068	9		0.31358
HPHAVNEIAL	FMNL3	Formin-like protein 3	HLA-B35:02	0.0888	10		0.3132
LAIDTEERL	EIF4G1	Eukaryotic translation initiation factor 4 gamma 1	HLA-B35:02	0.3847	9		0.31231
LPLTEEEL	PLIN2	Perilipin-2	HLA-B35:02	0.5735	8		0.31171
QIIEADEVL	RRAGA	Ras-related GTP-binding protein A	HLA-B35:02	0.8505	9		0.31155
FPNAIEHTL	UBA1	Ubiquitin-like modifier-activating enzyme 1	HLA-B35:02	0.0009	9		0.3111
TPDLGERIAL	KCTD15	BTB/POZ domain-containing protein KCTD15	HLA-B35:02	0.0908	10		0.31044
LPEAFPITL	VCPIP1	Deubiquitinating protein VCIP135	HLA-B35:02	0.0055	9		0.31043
TPDEIDHVF	PARP14	Poly [ADP-ribose] polymerase 14	HLA-B35:02	0.006	9		0.30985
HPTTAEIDL	H2AFY2	Core histone macro-H2A.2;Histone H2A	HLA-B35:02	0.0492	9		0.30929
FPHHEFVAL	DPAGT1	UDP-N-acetylglucosamine--dolichyl-phosphate N-acetylglucosaminephosphotransferase	HLA-B35:02	0.0032	9		0.30845
IPEENIATM	BTBD9	BTB/POZ domain-containing protein 9	HLA-B35:02	0.003	9		0.30793
RPMEFEAAL	AKIRIN1	Akirin-1	HLA-B35:02	0.0236	9		0.30788
HPDVAWDLM	ARHGEF40	Rho guanine nucleotide exchange factor 40	HLA-B35:02	0.0579	9		0.30759
QPTIVEALL	NEK8	Serine/threonine-protein kinase Nek8	HLA-B35:02	0.109	9		0.30751
QPEGEEPEM	PTK7	Inactive tyrosine-protein kinase 7	HLA-B35:02	0.1168	9		0.30749
SPTEVVERL	PUM2	Pumilio homolog 2	HLA-B35:02	0.0328	9		0.30715
EPDPEEWQL	SP3	Transcription factor Sp3	HLA-B35:02	0.0446	9		0.30705
LPWAEFESL	CBLC	E3 ubiquitin-protein ligase CBL-C	HLA-B35:02	0.0316	9		0.30681
LPFFIALPL	ADRA1B	Alpha-1B adrenergic receptor	HLA-B35:02	0.1367	9		0.30639
HPTWGDEQL	PTGS1	Prostaglandin G/H synthase 1	HLA-B35:02	0.044	9		0.30619
LPLAGEEEL	ZMAT3	Zinc finger matrin-type protein 3	HLA-B35:02	0.0193	9		0.30602
TAAELEEVL	ESYT1	Extended synaptotagmin-1	HLA-B35:02	0.2011	9		0.30552
SPEYFEPIL	KCTD9	BTB/POZ domain-containing protein KCTD9	HLA-B35:02	0.0744	9		0.30543
YPEDVAEELI	EZR	Ezrin	HLA-B35:02	0.1764	10		0.30539
LGHEEVVTL	TANC1	Protein TANC1	HLA-B35:02	1.1141	9		0.30513
MPFEEFEKL	KMO	Kynurenine 3-monooxygenase	HLA-B35:02	0.0038	9		0.30495
IPDGEFTAL	TTC30A	Tetratricopeptide repeat protein 30A	HLA-B35:02	0.0046	9	Bruggeman et al., 2018	0.30462	+
LPDPRELIEI	GBF1	Golgi-specific brefeldin A-resistance guanine nucleotide exchange factor 1	HLA-B35:02	0.3137	10		0.30432
LPYEDVAIPL	ANAPC13	Anaphase-promoting complex subunit 13	HLA-B35:02	0.0979	10		0.30402
LPVHVFEAL	PCIF1	Phosphorylated CTD-interacting factor 1	HLA-B35:02	0.0233	9		0.30371
HPDYEEYINL	ARHGAP5	Rho GTPase-activating protein 5	HLA-B35:02	0.0966	10		0.30354
IPPDGEFEL	AP1M1;AP2M1	AP-1 complex subunit mu-1;AP-2 complex subunit mu	HLA-B35:02	0.0307	9		0.30327
LPTETEVAP	MAP4	Microtubule-associated protein 4;Microtubule-associated protein	HLA-B35:02	1.4649	9		0.3031
APEEEDHVL	P4HB	Protein disulfide-isomerase	HLA-B35:02	0.0401	9		0.30305
LPIATVEEL	THEMIS2	Protein THEMIS2	HLA-B35:02	0.0061	9		0.30223
MPYFGEKEIEM	MYO1E	Unconventional myosin-Ie	HLA-B35:02	0.1882	11		0.30217
IPVWDQEFL	SKP1	S-phase kinase-associated protein 1	HLA-B35:02	0.0877	9		0.30175
APFFRDYIM	MOGAT2	2-acylglycerol O-acyltransferase 2	HLA-B35:02	0.0844	9		0.30172
IPAREGEAI	MKL1		HLA-B35:02	0.0831	9		0.30154
VPLDERIVF	FAM129B	Niban-like protein 1	HLA-B35:02	0.0477	9		0.30138
YPENAEEEL	NF2	Merlin	HLA-B35:02	0.0108	9		0.30134
FPIAPEIAL	TCEB1	Transcription elongation factor B polypeptide 1	HLA-B35:02	0.001	9		0.3012
HPHEEATTL	SH3D21	SH3 domain-containing protein 21	HLA-B35:02	0.004	9		0.30102
LPIIDPIL	ASPM	Abnormal spindle-like microcephaly-associated protein	HLA-B35:02	0.1866	8	Bruggeman et al., 2018	0.3006	+
SAVTEEAAL	POU2AF1	POU domain class 2-associating factor 1	HLA-B35:02	0.3197	9		0.30009
TALFVEHVL	RNF213	E3 ubiquitin-protein ligase RNF213	HLA-B35:02	0.2986	9		0.30007
IPDEVFDAV	LRRC40	Leucine-rich repeat-containing protein 40	HLA-B35:02	0.0172	9		0.29993
LPDHINIVL	NUDCD1	NudC domain-containing protein 1	HLA-B35:02	0.0041	9		0.2997
SPEDGIHEL	FN1	Fibronectin;Anastellin;Ugl-Y1;Ugl-Y2;Ugl-Y3	HLA-B35:02	0.0081	9		0.2989
TIFEIDPHL	SUFU	Suppressor of fused homolog	HLA-B35:02	0.7054	9		0.29877
LPFAVIGSTEEL	2020-09-06	Septin-6	HLA-B35:02	0.6836	12		0.29861
DPDEGEARL	ZBTB33	Transcriptional regulator Kaiso	HLA-B35:02	0.0595	9		0.29846
MPDLENRLIEL	SNTB2	Beta-2-syntrophin	HLA-B35:02	0.4338	11		0.29802
LPTEENFLL	CALB1;CALB2	Calbindin;Calretinin	HLA-B35:02	0.02	9		0.29708
YPDPEVVWF	MYLK	Myosin light chain kinase, smooth muscle;Myosin light chain kinase, smooth muscle, deglutamylated form	HLA-B35:02	0.016	9		0.29666
FPEDVVRVIF	FGD2	FYVE, RhoGEF and PH domain-containing protein 2	HLA-B35:02	0.0966	10		0.29654
DPSGEIVEL	C12orf10	UPF0160 protein MYG1, mitochondrial	HLA-B35:02	0.0248	9		0.29652
NSTGEEVAM	LMNA	Prelamin-A/C;Lamin-A/C	HLA-B35:02	1.0671	9		0.29615
FPVEDVFTL	JMJD4	JmjC domain-containing protein 4	HLA-B35:02	0.0011	9		0.29609
MPGNIVFVL	NCF2	Neutrophil cytosol factor 2	HLA-B35:02	0.0248	9		0.29587
KPDREEIQM	CTNND1	Catenin delta-1	HLA-B35:02	0.267	9		0.29567
QADEEFQIL	MAGT1	Magnesium transporter protein 1	HLA-B35:02	0.298	9		0.29565
SPLAFEHVM	SORL1	Sortilin-related receptor	HLA-B35:02	0.0203	9		0.29544
DAEPLEIIL	NHP2L1	NHP2-like protein 1;NHP2-like protein 1, N-terminally processed	HLA-B35:02	0.1239	9		0.29487
LGHEEALEM	KIAA1671	Uncharacterized protein KIAA1671	HLA-B35:02	1.7156	9		0.29472
TPDGREINF	PDE6A	Rod cGMP-specific 3,5-cyclic phosphodiesterase subunit alpha	HLA-B35:02	0.0921	9		0.29449
HAEATIVVM	RAB25	Ras-related protein Rab-25	HLA-B35:02	0.0674	9		0.29391
VPAEELVEM	AKAP12	A-kinase anchor protein 12	HLA-B35:02	0.0037	9		0.29385
LAEIGAVTL	TSEN34	tRNA-splicing endonuclease subunit Sen34	HLA-B35:02	0.1781	9		0.29377
FPRDPEIEM	VCAM1	Vascular cell adhesion protein 1	HLA-B35:02	0.0036	9		0.29339
TANEELEAL	ATXN2	Ataxin-2	HLA-B35:02	0.1919	9		0.29307
LPAEEVDVL	HMHA1	Minor histocompatibility protein HA-1;Minor histocompatibility antigen HA-1	HLA-B35:02	0.0034	9		0.29265
SPVEHEGVL	ZKSCAN7;ZNF852	Zinc finger protein with KRAB and SCAN domains 7;Zinc finger protein 852	HLA-B35:02	0.0304	9		0.29262
DPAEEYEL	RGL1	Ral guanine nucleotide dissociation stimulator-like 1	HLA-B35:02	0.5789	8		0.29197
FPQIGELIL	CWC22	Pre-mRNA-splicing factor CWC22 homolog	HLA-B35:02	0.0086	9		0.29197
HPFFNDFTF	ST14	Suppressor of tumorigenicity 14 protein	HLA-B35:02	0.016	9		0.29186
DPFPAAIIL	PBK	Lymphokine-activated killer T-cell-originated protein kinase	HLA-B35:02	0.0096	9	CTDatabase;Da Silva et al., 2017	0.29185
FPSADEIII	KDM7A	Lysine-specific demethylase 7A	HLA-B35:02	0.018	9		0.2916
RPAGEENEL	ATP2B4	Plasma membrane calcium-transporting ATPase 4	HLA-B35:02	0.1043	9		0.29159
YAVGEVEAL	THTPA	Thiamine-triphosphatase	HLA-B35:02	0.0511	9		0.29122
LPNELIELL	CLTC;CLTCL1	Clathrin heavy chain;Clathrin heavy chain 1;Clathrin heavy chain 2	HLA-B35:02	0.0101	9		0.29115
NADGEEVAM	LMNB2	Lamin-B2	HLA-B35:02	0.0599	9		0.29075
APDEAAEAL	EFHD2	EF-hand domain-containing protein D2	HLA-B35:02	0.0169	9		0.29024
QAFGDEREL	ZNF711	Zinc finger protein 711	HLA-B35:02	0.3217	9		0.29013
EGDPEEREM	ZNF697	Zinc finger protein 697	HLA-B35:02	1.5069	9		0.28997
LPEEGVEL	DOCK8	Dedicator of cytokinesis protein 8	HLA-B35:02	0.1637	8		0.28961
NPDEVHAIL	FAM83D	Protein FAM83D	HLA-B35:02	0.0042	9		0.28938
KPHEEHHAF	EIF4E3	Eukaryotic translation initiation factor 4E type 3	HLA-B35:02	0.1194	9		0.28936
VPTEENEM	HSPH1	Heat shock protein 105 kDa	HLA-B35:02	0.5318	8		0.28926
IAQHEEREM	STK38	Serine/threonine-protein kinase 38	HLA-B35:02	1.8624	9		0.28888
NIPEVEAVL	TRPC4AP	Short transient receptor potential channel 4-associated protein	HLA-B35:02	0.7819	9		0.28874
HAAEYGAEAL			HLA-B35:02	0.5499	10		0.28704
YPDENGFDAF	NRD1	Nardilysin	HLA-B35:02	0.0104	10		0.28643
MPAGEIEQF	FAM208B	Protein FAM208B	HLA-B35:02	0.0309	9		0.2864
TVEEDDTIM	NANS	Sialic acid synthase	HLA-B35:02	0.7803	9		0.28625
FAEGFVRAL	JUN	Transcription factor AP-1	HLA-B35:02	0.1121	9		0.286
YPDAVATWL	SPP1	Osteopontin	HLA-B35:02	0.0082	9		0.28578
LPDEIYHVY	NTMT1	N-terminal Xaa-Pro-Lys N-methyltransferase 1;N-terminal Xaa-Pro-Lys N-methyltransferase 1, N-terminally processed	HLA-B35:02	0.0304	9		0.28549
HPYEVAEVI	CUTA	Protein CutA	HLA-B35:02	0.0074	9		0.2852
EAGGEDFAM	RBM8A	RNA-binding protein 8A	HLA-B35:02	0.335	9		0.28514
TPLHEIAL	DHX9	ATP-dependent RNA helicase A	HLA-B35:02	0.2562	8		0.28475
MPDFEGLYPVHL	NFKB2	Nuclear factor NF-kappa-B p100 subunit;Nuclear factor NF-kappa-B p52 subunit	HLA-B35:02	0.5811	12		0.2844
EANAVFDIL	NOC4L	Nucleolar complex protein 4 homolog	HLA-B35:02	0.2748	9		0.28415
VPDIEPAAL	CDT1	DNA replication factor Cdt1	HLA-B35:02	0.0078	9		0.28406
HPAYTEEEL	NUCB1	Nucleobindin-1	HLA-B35:02	0.0109	9		0.28403
MPPDIAAEAQAL	HUWE1	E3 ubiquitin-protein ligase HUWE1	HLA-B35:02	0.2286	12		0.28395
NAFEELVAF	MCM3	DNA replication licensing factor MCM3	HLA-B35:02	0.0875	9		0.28351
QPTFTEHLL	HHLA3	HERV-H LTR-associating protein 3	HLA-B35:02	0.0904	9		0.28327
VPDVHEEVL	MVP	Major vault protein	HLA-B35:02	0.0285	9		0.28311
PNLEFVAM	RAN	GTP-binding nuclear protein Ran	HLA-B35:02	1.2766	8		0.28303
FPTIHGNDEV	MCM6	DNA replication licensing factor MCM6	HLA-B35:02	0.266	10		0.28215
MPVEPEEL	HUWE1	E3 ubiquitin-protein ligase HUWE1	HLA-B35:02	0.0548	8		0.2821
QPELPEVIAM	CTNND1	Catenin delta-1	HLA-B35:02	0.117	10		0.28208
LPVEDDIDL	PDIA6	Protein disulfide-isomerase A6	HLA-B35:02	0.0211	9		0.28191
FPEERPEVL	STK36	Serine/threonine-protein kinase 36	HLA-B35:02	0.0049	9		0.28183
QVVEEDPEL	ALOX5	Arachidonate 5-lipoxygenase	HLA-B35:02	0.8303	9		0.28167
HINEGETAM	BSG	Basigin	HLA-B35:02	0.2301	9		0.28152
FPAEFDLNPEL	RASGRP2	RAS guanyl-releasing protein 2	HLA-B35:02	0.1244	11		0.2813
IPITETEAYQL	KIZ	Centrosomal protein kizuna	HLA-B35:02	0.5858	11		0.28109
LPETAVIGL	BZW2	Basic leucine zipper and W2 domain-containing protein 2	HLA-B35:02	0.0311	9		0.28064
YPVEDFEASF	FRYL	Protein furry homolog-like	HLA-B35:02	0.0404	10		0.28036
SPAEDFVL	APMAP	Adipocyte plasma membrane-associated protein	HLA-B35:02	0.1669	8		0.28009
LPDEEIFQQL	COMMD8	COMM domain-containing protein 8	HLA-B35:02	0.1208	10		0.27981
HASDRIIAL	TKT	Transketolase	HLA-B35:02	0.045	9		0.27948
IPDEIIDMV	LSM4	U6 snRNA-associated Sm-like protein LSm4	HLA-B35:02	0.0392	9		0.27895
IPVEEHFQTL	ANKRD27	Ankyrin repeat domain-containing protein 27	HLA-B35:02	0.0986	10		0.27827
IAHLEITAL	TTC14	Tetratricopeptide repeat protein 14	HLA-B35:02	0.2434	9		0.27774
MPQEEVELL	BRD3	Bromodomain-containing protein 3	HLA-B35:02	0.0065	9		0.27753
FPETVFTTV	TBX18;TBX15	T-box transcription factor TBX15;T-box transcription factor TBX18	HLA-B35:02	0.0242	9		0.2774
IPIFTDVAL	GTF3C4	General transcription factor 3C polypeptide 4	HLA-B35:02	0.0063	9		0.27738
FPVEVEVPM	PRKDC	DNA-dependent protein kinase catalytic subunit	HLA-B35:02	0.0031	9		0.27696
LPTEAEFQL	FAM46C	Protein FAM46C	HLA-B35:02	0.0135	9		0.27682
MPMADGREFNL	PTGIS	Prostacyclin synthase	HLA-B35:02	0.289	11		0.27664
YAEADIVTL	DDR1	Epithelial discoidin domain-containing receptor 1	HLA-B35:02	0.0428	9		0.27627
HPTHEWQAL	SIL1	Nucleotide exchange factor SIL1	HLA-B35:02	0.0364	9		0.27626
TPTEEHVL	SMPD4	Sphingomyelin phosphodiesterase 4	HLA-B35:02	0.3807	8		0.27614
LPGEDHIL	PNPLA2	Patatin-like phospholipase domain-containing protein 2	HLA-B35:02	0.7453	8		0.27612
EACGVIVEL	RUVBL1	RuvB-like 1	HLA-B35:02	0.3863	9		0.27542
TIEDAIAVL	CCDC124	Coiled-coil domain-containing protein 124	HLA-B35:02	0.4858	9		0.27534
HPPSAEVEAIAL	PFAS	Phosphoribosylformylglycinamidine synthase	HLA-B35:02	0.6257	12		0.27524
LPSAGEEIL	MTIF2	Translation initiation factor IF-2, mitochondrial	HLA-B35:02	0.0329	9		0.27518
HPNFNGNTLDNDIM			HLA-B35:02	0.6722	14		0.27509
YPEDVAEEL	EZR	Ezrin	HLA-B35:02	0.0027	9		0.27485
FPAEAGRDTL	USP10	Ubiquitin carboxyl-terminal hydrolase 10	HLA-B35:02	0.0128	10		0.27467
VPDEDFVL	SPHK1	Sphingosine kinase 1	HLA-B35:02	0.1784	8		0.27459
MPVDDVIGTL	NIPA2	Magnesium transporter NIPA2	HLA-B35:02	0.0091	10		0.27408
MPITEVFKEEM	ACLY	ATP-citrate synthase	HLA-B35:02	0.4539	11		0.27396
HPLHDFIL	XRN2	5-3 exoribonuclease 2	HLA-B35:02	0.2931	8		0.27307
VAAEDHEAL	NAT8L	N-acetylaspartate synthetase	HLA-B35:02	0.1417	9		0.27286
DAEAREAAL	PCNT	Pericentrin	HLA-B35:02	0.3167	9		0.2724
LPAGIVAVL	ECD	Protein SGT1	HLA-B35:02	0.0046	9		0.2724
QAETEARTL	KIAA1524	Protein CIP2A	HLA-B35:02	0.9984	9		0.27225
HPGGEEVL	CYB5B;CYB5A	Cytochrome b5;Cytochrome b5 type B	HLA-B35:02	0.6472	8		0.27169
SPHEGFEQM	PLD5	Inactive phospholipase D5	HLA-B35:02	0.025	9		0.27127
LPEQEEEIL	SRPK1	SRSF protein kinase 1	HLA-B35:02	0.0911	9		0.26995
DAHPETIVL	ITPK1	Inositol-tetrakisphosphate 1-kinase	HLA-B35:02	0.0365	9		0.26982
HPEVLPIYTEL	SLC38A5;SLC38A3	Sodium-coupled neutral amino acid transporter 5;Sodium-coupled neutral amino acid transporter 3	HLA-B35:02	0.4736	11		0.26982
YPDINFNRL	PARG	Poly(ADP-ribose) glycohydrolase	HLA-B35:02	0.0047	9		0.2698
KPDEAETNM	RIF1	Telomere-associated protein RIF1	HLA-B35:02	0.0871	9		0.26928
SAAPAEIAV	FILIP1	Filamin-A-interacting protein 1	HLA-B35:02	0.2625	9		0.26907
IPLGEIISF	ASAH1	Acid ceramidase;Acid ceramidase subunit alpha;Acid ceramidase subunit beta	HLA-B35:02	0.0377	9		0.26894
HAEAEARHL	CALU	Calumenin	HLA-B35:02	0.9318	9		0.26878
LPVATDFEF	FAM120B	Constitutive coactivator of peroxisome proliferator-activated receptor gamma	HLA-B35:02	0.038	9		0.26875
HPEHAFYEF	LATS1;LATS2	Serine/threonine-protein kinase LATS1;Serine/threonine-protein kinase LATS2	HLA-B35:02	0.0512	9		0.26873
APLEDEATL	FAU	Ubiquitin-like protein FUBI	HLA-B35:02	0.0378	9		0.2687
TAFFGDVVL	CCDC134	Coiled-coil domain-containing protein 134	HLA-B35:02	0.0903	9		0.26864
FPDREENAV	HDLBP	Vigilin	HLA-B35:02	0.0248	9		0.26843
VPLEEVVL	GRAMD2	GRAM domain-containing protein 2	HLA-B35:02	0.2485	8		0.26835
MPTELHIAL	AOX1	Aldehyde oxidase	HLA-B35:02	0.0019	9		0.26818
FPAETVELL	SSFA2	Sperm-specific antigen 2	HLA-B35:02	0.0018	9		0.26813
MPLEEGDTF	SF3B3	Splicing factor 3B subunit 3	HLA-B35:02	0.0112	9		0.26795
LPENVEEAI	HDLBP	Vigilin	HLA-B35:02	0.0525	9		0.2678
MPDIDFNL	AHNAK	Neuroblast differentiation-associated protein AHNAK	HLA-B35:02	0.1251	8		0.26746
YPECEIRTM	STAG3L1	Putative STAG3-like protein 1	HLA-B35:02	0.0159	9	Bruggeman et al., 2018	0.26739
EPDGPEGEAL	PDZD8	PDZ domain-containing protein 8	HLA-B35:02	0.2087	10		0.26726
TADGAHFEL	CHERP	Calcium homeostasis endoplasmic reticulum protein	HLA-B35:02	0.0986	9		0.26715
STFLEAIPM			HLA-B35:02	1.2709	9		0.26701
MPNENIPEL	NRBP1	Nuclear receptor-binding protein	HLA-B35:02	0.0008	9		0.26677
FATVVEELF	BCL2	Apoptosis regulator Bcl-2	HLA-B35:02	1.255	9		0.26661
YPQFGEVVL	FRAS1	Extracellular matrix protein FRAS1	HLA-B35:02	0.0029	9		0.26641
YPETGVFVI	CDK17		HLA-B35:02	0.0084	9		0.26634
IPLEEVTL	PLEKHF1	Pleckstrin homology domain-containing family F member 1	HLA-B35:02	0.187	8		0.26627
HPDTGDIIMEF	PRMT7	Protein arginine N-methyltransferase 7	HLA-B35:02	0.2307	11		0.26604
QPYGGFLDIL	GAK	Cyclin-G-associated kinase	HLA-B35:02	0.263	10		0.26594
TPEEPEPEL	NOL3	Nucleolar protein 3	HLA-B35:02	0.0282	9		0.26584
HPDYILEEM	MMEL1	Membrane metallo-endopeptidase-like 1;Membrane metallo-endopeptidase-like 1, soluble form	HLA-B35:02	0.0075	9		0.26564
LPCIENAVL	GBP5	Guanylate-binding protein 5	HLA-B35:02	0.2183	9		0.26497
HPIHTEAVA	TMTC2;TMTC1	Transmembrane and TPR repeat-containing protein 2;Transmembrane and TPR repeat-containing protein 1	HLA-B35:02	0.2704	9		0.26494
HPIHTEAVT	TMTC3	Transmembrane and TPR repeat-containing protein 3	HLA-B35:02	0.6189	9		0.26494
NAVYTFETL	FAM129B	Niban-like protein 1	HLA-B35:02	0.2937	9		0.26486
YPYAEEVM	GUSB	Beta-glucuronidase	HLA-B35:02	0.0325	8		0.26476
IPAEADFLL	CASP10	Caspase-10;Caspase-10 subunit p23/17;Caspase-10 subunit p12	HLA-B35:02	0.0077	9		0.26475
LPEDFAVVF	DNAJC13	DnaJ homolog subfamily C member 13	HLA-B35:02	0.0161	9		0.26461
FPEPNPRVIEL	ITGA4	Integrin alpha-4	HLA-B35:02	0.0925	11		0.26432
YPCHTVATDIL	CNOT1	CCR4-NOT transcription complex subunit 1	HLA-B35:02	1.537	11		0.26417
YPFDGHNEGTL	FNBP1L	Formin-binding protein 1-like	HLA-B35:02	0.0189	11		0.26405
TPNEERNVM	COPB2	Coatomer subunit beta	HLA-B35:02	0.0202	9		0.26353
NPLVDFVEL	TRAPPC3	Trafficking protein particle complex subunit 3	HLA-B35:02	0.023	9		0.26308
DPAEDGVTAL	SHKBP1	SH3KBP1-binding protein 1	HLA-B35:02	0.0969	10		0.26253
HPQGFEVAL	TMEM187	Transmembrane protein 187	HLA-B35:02	0.0067	9		0.26245
DPEEDEPTL	PPP2R5D;PPP2R5C;PPP2R5A;PPP2R5E	Serine/threonine-protein phosphatase 2A 56 kDa regulatory subunit delta isoform;Serine/threonine-protein phosphatase 2A 56 kDa regulatory subunit alpha isoform;Serine/threonine-protein phosphatase 2A 56 kDa regulatory subunit gamma isoform;Serine/threonine-protein phosphatase 2A 56 kDa regulatory subunit epsilon isoform	HLA-B35:02	0.0914	9		0.26242
NPQAPEFIL	USP10	Ubiquitin carboxyl-terminal hydrolase 10	HLA-B35:02	0.0434	9		0.26178
EAYAELIVL	LSR	Lipolysis-stimulated lipoprotein receptor	HLA-B35:02	0.1074	9		0.26167
MPHEDCITAL	WDR75	WD repeat-containing protein 75	HLA-B35:02	0.0278	10		0.26125
MPEQIVIHAL	STAG2	Cohesin subunit SA-2	HLA-B35:02	0.0477	10		0.26118
YPFIDVGL	ERF	ETS domain-containing transcription factor ERF	HLA-B35:02	0.0622	8		0.26098
DAHEETISI	PPP4R1	Serine/threonine-protein phosphatase 4 regulatory subunit 1	HLA-B35:02	0.1588	9		0.26095
LPDFTELDL	RFX1	MHC class II regulatory factor RFX1	HLA-B35:02	0.0836	9		0.26065
HPENGEEAV	ZNF24;ZSCAN32	Zinc finger protein 24;Zinc finger and SCAN domain-containing protein 32	HLA-B35:02	0.1065	9		0.2606
DVHGPDWHL	AHNAK	Neuroblast differentiation-associated protein AHNAK	HLA-B35:02	0.6364	9		0.26052
EVHGPDWHL	AHNAK	Neuroblast differentiation-associated protein AHNAK	HLA-B35:02	0.7751	9		0.26052
MPETTETVL	HLA-DPA1	HLA class II histocompatibility antigen, DP alpha 1 chain	HLA-B35:02	0.0061	9		0.26049
SAYEFYHAL	EPAS1	Endothelial PAS domain-containing protein 1	HLA-B35:02	0.0819	9		0.26023
FPTEADLEDF	APLP2	Amyloid-like protein 2	HLA-B35:02	0.1084	10		0.26007
QADFALEAL	MYH14	Myosin-14	HLA-B35:02	0.3701	9		0.26002
HPDEDAVEA	PPP4R2	Serine/threonine-protein phosphatase 4 regulatory subunit 2	HLA-B35:02	0.1572	9		0.25972
LPIGEEYLL	LRRK2	Leucine-rich repeat serine/threonine-protein kinase 2	HLA-B35:02	0.0143	9		0.25945
RPSDLIHGEVL	LIMK1	LIM domain kinase 1	HLA-B35:02	1.1724	11		0.25944
IPDEADFLL	CASP8	Caspase-8;Caspase-8 subunit p18;Caspase-8 subunit p10	HLA-B35:02	0.0184	9		0.25925
LPALEIVM	SMEK2	Serine/threonine-protein phosphatase 4 regulatory subunit 3B	HLA-B35:02	0.1712	8		0.25916
LPDFERESL	HERC1	Probable E3 ubiquitin-protein ligase HERC1	HLA-B35:02	0.0216	9		0.25906
LPDENREVL	DLC1;STARD8	Rho GTPase-activating protein 7;StAR-related lipid transfer protein 8	HLA-B35:02	0.0058	9		0.25899
LPLEEAYRF	EHD4	EH domain-containing protein 4	HLA-B35:02	0.0728	9		0.2586
IPVIEYEQF	POFUT2	GDP-fucose protein O-fucosyltransferase 2	HLA-B35:02	0.2753	9		0.25816
RPEPEGEAM	USP22	Ubiquitin carboxyl-terminal hydrolase 22	HLA-B35:02	0.0812	9		0.2581
FPIEVRHYL	STAT5B;STAT5A	Signal transducer and activator of transcription 5B;Signal transducer and activator of transcription;Signal transducer and activator of transcription 5A	HLA-B35:02	0.003	9		0.25801
YAVDRAITH	HNRNPL	Heterogeneous nuclear ribonucleoprotein L	HLA-B35:02	1.5169	9		0.25795
LPAEDEVLL	PPP2R3C;C14ORF10	Serine/threonine-protein phosphatase 2A regulatory subunit B subunit gamma	HLA-B35:02	0.0054	9		0.25766
MPVDEEVESL	DNAJC13	DnaJ homolog subfamily C member 13	HLA-B35:02	0.0197	10		0.25742
PIAPEIAL	TCEB1	Transcription elongation factor B polypeptide 1	HLA-B35:02	0.537	8		0.25734
SPAEYVEVL	BAG6;BAT3	Large proline-rich protein BAG6	HLA-B35:02	0.006	9		0.25733
FPTLEITL	FAM46C	Protein FAM46C	HLA-B35:02	0.0657	8		0.25698
YPDTAGPEAAL	CORO1C;CORO1B	Coronin-1C;Coronin;Coronin-1B	HLA-B35:02	0.0467	11		0.25669
EPTEAYEVL	COPG1	Coatomer subunit gamma-1	HLA-B35:02	0.0309	9		0.25659
TPSFLEEVL	KCTD11	BTB/POZ domain-containing protein KCTD11	HLA-B35:02	0.0386	9		0.25617
YPEEDNEAF	DENND4B	DENN domain-containing protein 4B	HLA-B35:02	0.0143	9		0.25612
IPAEVLIL	GMPPA	Mannose-1-phosphate guanyltransferase alpha	HLA-B35:02	0.1728	8		0.25553
NPSVREFVL	IDO1	Indoleamine 2,3-dioxygenase 1	HLA-B35:02	0.079	9		0.25541
MPTTERVTL	CASP1	Caspase;Caspase-1;Caspase-1 subunit p20;Caspase-1 subunit p10	HLA-B35:02	0.0081	9		0.2554
IPVDENAVHVL	RBM12	RNA-binding protein 12	HLA-B35:02	0.1512	11		0.2553
TPAFHYDIL	CYP4A11	Cytochrome P450 4A11	HLA-B35:02	0.0484	9		0.255
HPAGGEENM	CASP6	Caspase-6;Caspase-6 subunit p18;Caspase-6 subunit p11	HLA-B35:02	0.0356	9		0.25477
LPDEEHDL	SKAP1	Src kinase-associated phosphoprotein 1	HLA-B35:02	0.7863	8		0.25462
FPSEITDTV	WNK1	Serine/threonine-protein kinase WNK1	HLA-B35:02	0.0047	9		0.25459
LAEDIDPEL	HGS	Hepatocyte growth factor-regulated tyrosine kinase substrate	HLA-B35:02	0.2173	9		0.25444
MPDHVIPEI	DHX40	Probable ATP-dependent RNA helicase DHX40	HLA-B35:02	0.0088	9		0.25437
LPEETPAAVL	CDAN1	Codanin-1	HLA-B35:02	0.0745	10		0.25422
HAHLDIEAF	ASS1	Argininosuccinate synthase	HLA-B35:02	0.3738	9		0.25358
LPEELFHPL	CPN2	Carboxypeptidase N subunit 2	HLA-B35:02	0.0324	9		0.25347
LPFGGTFDL	NT5E	5-nucleotidase	HLA-B35:02	0.0135	9		0.2534
FPTAEEPHL	ARAP2	Arf-GAP with Rho-GAP domain, ANK repeat and PH domain-containing protein 2	HLA-B35:02	0.0163	9		0.25326
LPVGPENGVEL	SRPR	Signal recognition particle receptor subunit alpha	HLA-B35:02	0.19	11		0.25314
HPSELIAEM	CIR1	Corepressor interacting with RBPJ 1	HLA-B35:02	0.0036	9		0.25305
HPLEGTHEL	ZC3H7A	Zinc finger CCCH domain-containing protein 7A	HLA-B35:02	0.0021	9		0.25249
HAFVELHEF	CYTH1	Cytohesin-1	HLA-B35:02	0.2569	9		0.2524
LPLEEHYRF	EHD2;EHD1;EHD3	EH domain-containing protein 2;EH domain-containing protein 1;EH domain-containing protein 3	HLA-B35:02	0.0971	9		0.25222
DPNLEFVAM	RAN	GTP-binding nuclear protein Ran	HLA-B35:02	0.038	9		0.25214
VPFGAAHIL	ADRB2	Beta-2 adrenergic receptor	HLA-B35:02	0.0059	9		0.25209
QPTGEEPAL	PCGF1	Polycomb group RING finger protein 1	HLA-B35:02	0.0467	9		0.25195
IPFEFPLHL	DSCR3	Down syndrome critical region protein 3	HLA-B35:02	0.0087	9		0.25185
HPEEDHRTI	SGK223	Tyrosine-protein kinase SgK223	HLA-B35:02	0.0607	9		0.25166
FPEVEDVVM	EIF2S1	Eukaryotic translation initiation factor 2 subunit 1	HLA-B35:02	0.0045	9		0.25138
NPIEEISVL	SMC4	Structural maintenance of chromosomes protein;Structural maintenance of chromosomes protein 4	HLA-B35:02	0.0031	9		0.25123
FPDAGEDEL	IQGAP1	Ras GTPase-activating-like protein IQGAP1	HLA-B35:02	0.0071	9		0.25104
EVDHGDFEM	UBR4	E3 ubiquitin-protein ligase UBR4	HLA-B35:02	0.3359	9		0.25093
FPSGETIVM	SEC23IP	SEC23-interacting protein	HLA-B35:02	0.0013	9		0.25088
LAAEEPHAL	SFI1	Protein SFI1 homolog	HLA-B35:02	0.0474	9		0.25067
LPRDEADEL	APOL2	Apolipoprotein L2	HLA-B35:02	0.0324	9		0.25067
LPDVERATL	SYDE1	Rho GTPase-activating protein SYDE1	HLA-B35:02	0.0098	9		0.25066
VPVEEPLEL	SIX5	Homeobox protein SIX5	HLA-B35:02	0.0049	9		0.25035
FPHELEVPAL	PEX6	Peroxisome assembly factor 2	HLA-B35:02	0.0309	10		0.25031
TADFREQIL	RALA	Ras-related protein Ral-A	HLA-B35:02	0.5527	9		0.24965
QPDPAIGVHL	PIGK	GPI-anchor transamidase	HLA-B35:02	0.1173	10		0.24938
VPIPTTEEL	RP2	Protein XRP2	HLA-B35:02	0.0054	9		0.24938
LGHEEDYAL	ADRBK1;ADRBK2	Beta-adrenergic receptor kinase 1;Beta-adrenergic receptor kinase 2	HLA-B35:02	1.2436	9		0.24937
SPEEIDAQL	PDAP1	28 kDa heat- and acid-stable phosphoprotein	HLA-B35:02	0.0234	9		0.24907
SPDENENEV	GBP1	Interferon-induced guanylate-binding protein 1	HLA-B35:02	0.0525	9		0.24894
LPVEIDPLI	LRBA	Lipopolysaccharide-responsive and beige-like anchor protein	HLA-B35:02	0.0383	9		0.24879
MSLIDVVAI	KCND1	Potassium voltage-gated channel subfamily D member 1	HLA-B35:02	1.5482	9		0.24848
WPQEAGEYAV	FLNA	Filamin-A	HLA-B35:02	0.371	10		0.24824
NVEEADAAM	HNRNPA0	Heterogeneous nuclear ribonucleoprotein A0	HLA-B35:02	0.2333	9		0.24811
LPLTEHEL	KLHL6	Kelch-like protein 6	HLA-B35:02	0.3399	8		0.24791
DPDGHEICF	GLOD4	Glyoxalase domain-containing protein 4	HLA-B35:02	0.1897	9		0.24787
RPEEDAAAL	PTRF	Polymerase I and transcript release factor	HLA-B35:02	0.0369	9		0.24756
TAGPEEAAL	TMX4	Thioredoxin-related transmembrane protein 4	HLA-B35:02	0.4433	9		0.24747
SVAEDDAEL	IFT57	Intraflagellar transport protein 57 homolog	HLA-B35:02	0.5195	9		0.24745
FPDRTEATI	RAB33B	Ras-related protein Rab-33B	HLA-B35:02	0.0137	9		0.24703
IPDIPDHFL	HINFP	Histone H4 transcription factor	HLA-B35:02	0.0336	9		0.2469
LPDDIGAAL	LRCH2	Leucine-rich repeat and calponin homology domain-containing protein 2	HLA-B35:02	0.0015	9		0.2469
NVFATDAIL	EIF3D	Eukaryotic translation initiation factor 3 subunit D	HLA-B35:02	0.5605	9		0.24683
HPSDIEVDLL	B2M	Beta-2-microglobulin;Beta-2-microglobulin form pI 5.3	HLA-B35:02	0.0744	10		0.24682
AAFDGGFTV	LONP2	Lon protease homolog 2, peroxisomal	HLA-B35:02	0.2119	9		0.2467
NPLETEYGL	MCM3	DNA replication licensing factor MCM3	HLA-B35:02	0.0338	9		0.24588
DAIARDAEL	CHD1	Chromodomain-helicase-DNA-binding protein 1	HLA-B35:02	0.1374	9		0.24537
EPEPEPIVL	FAM83G	Protein FAM83G	HLA-B35:02	0.0165	9		0.24484
IVENGETEM	GSPT1	Eukaryotic peptide chain release factor GTP-binding subunit ERF3A	HLA-B35:02	0.8779	9		0.2445
TPQETEPEA	RINL	Ras and Rab interactor-like protein	HLA-B35:02	0.7031	9		0.24434
NPPDHEVVAM	BRD3;BRD4	Bromodomain-containing protein 3;Bromodomain-containing protein 4	HLA-B35:02	0.0881	10		0.24428
HPGVAEVVF	POLDIP3	Polymerase delta-interacting protein 3	HLA-B35:02	0.0805	9		0.24385
FPEHRAAEI	LSS	Lanosterol synthase	HLA-B35:02	0.0807	9		0.2438
LPVGGFADLM	ITCH	E3 ubiquitin-protein ligase Itchy homolog	HLA-B35:02	0.2315	10		0.24357
VADGERAAL	EPM2AIP1	EPM2A-interacting protein 1	HLA-B35:02	0.1744	9		0.2434
EPAPEAEAL	TP53RK	TP53-regulating kinase	HLA-B35:02	0.0152	9		0.24323
IPEGTILTM	NANS	Sialic acid synthase	HLA-B35:02	0.006	9		0.243
IPEDAEATV	SLC4A3	Anion exchange protein 3	HLA-B35:02	0.0344	9		0.24287
HPEYGEVIQL	EIF1;EIF1B	Eukaryotic translation initiation factor 1;Eukaryotic translation initiation factor 1b	HLA-B35:02	0.0844	10		0.24278
NPIPFPETF	FAM127B;FAM127C;FAM127A	Protein FAM127B;Protein FAM127C;Protein FAM127A	HLA-B35:02	0.0169	9		0.24278
TPSNIAIVL	ARHGAP17;SH3BP1	Rho GTPase-activating protein 17;SH3 domain-binding protein 1	HLA-B35:02	0.0076	9		0.24266
VVHAVEVAL			HLA-B35:02	0.6594	9		0.24202
IVVDAIDVL	PRKDC	DNA-dependent protein kinase catalytic subunit	HLA-B35:02	0.4106	9		0.24194
VPDEDFFSL	GPSM2	G-protein-signaling modulator 2	HLA-B35:02	0.0071	9		0.24189
QAQEELAEM	RAI14	Ankycorbin	HLA-B35:02	0.3801	9		0.24173
TEIPTAITI	ITPR3	Inositol 1,4,5-trisphosphate receptor type 3	HLA-B35:02	0.9652	9		0.24167
LPVDFVECL	FMNL3;FMNL2	Formin-like protein 3	HLA-B35:02	0.0397	9		0.24158
EACERELAL	DFFA	DNA fragmentation factor subunit alpha	HLA-B35:02	0.7242	9		0.2414
NPDELAEAL	GIPC1	PDZ domain-containing protein GIPC1	HLA-B35:02	0.0074	9		0.24134
EPIHADILL	PTPRC	Receptor-type tyrosine-protein phosphatase C	HLA-B35:02	0.0188	9		0.24057
VPSEVEPFL	SLC38A5	Sodium-coupled neutral amino acid transporter 5	HLA-B35:02	0.03	9		0.24054
YPLEDHTEF	MADD	MAP kinase-activating death domain protein	HLA-B35:02	0.0038	9		0.24046
HPSDIEVDL	B2M	Beta-2-microglobulin;Beta-2-microglobulin form pI 5.3	HLA-B35:02	0.0099	9		0.24027
TPDTRELEF	DCAF11	DDB1- and CUL4-associated factor 11	HLA-B35:02	0.0959	9		0.24005
LPVVDFNEM	NFE2L2	Nuclear factor erythroid 2-related factor 2	HLA-B35:02	0.0154	9		0.23978
HPATAEYEF	HSPB2-C11orf52;HSPB2	Heat shock protein beta-2	HLA-B35:02	0.0255	9		0.23949
YPTRTNEEL	XYLT2	Xylosyltransferase 2	HLA-B35:02	0.0094	9		0.23939
TPEDAVEAL	MAFB;MAFA	Transcription factor MafB;Transcription factor MafA	HLA-B35:02	0.0074	9		0.23914
FPEDADIDL	PPID	Peptidyl-prolyl cis-trans isomerase D	HLA-B35:02	0.0114	9		0.23908
IPADTFAAL	IQGAP1	Ras GTPase-activating-like protein IQGAP1	HLA-B35:02	0.0027	9		0.2389
HPTDERVAL	KYNU	Kynureninase	HLA-B35:02	0.0074	9		0.23884
SPDNGEAIL	ZNF746	Zinc finger protein 746	HLA-B35:02	0.0316	9		0.23872
QAAAEGAVL	LAP3	Cytosol aminopeptidase	HLA-B35:02	0.2766	9		0.23861
SPAADNIEM	OCIAD1	OCIA domain-containing protein 1	HLA-B35:02	0.0152	9		0.2384
VPDTESETRIL	C3	Complement C3;Complement C3 beta chain;C3-beta-c;Complement C3 alpha chain;C3a anaphylatoxin;Acylation stimulating protein;Complement C3b alpha chain;Complement C3c alpha chain fragment 1;Complement C3dg fragment;Complement C3g fragment;Complement C3d fragment;Complement C3f fragment;Complement C3c alpha chain fragment 2	HLA-B35:02	1.3748	11		0.23814
TAGYGINIL	C9	Complement component C9;Complement component C9a;Complement component C9b	HLA-B35:02	0.7744	9		0.23786
DVHGPDWNL	AHNAK	Neuroblast differentiation-associated protein AHNAK	HLA-B35:02	0.7443	9		0.23784
YPFIQGEHVL	KIAA1462	Junctional protein associated with coronary artery disease	HLA-B35:02	0.0082	10		0.23779
LPSEPEETL	FAM134A	Protein FAM134A	HLA-B35:02	0.008	9		0.23768
NAVGDGIVL	LCP1	Plastin-2	HLA-B35:02	0.0649	9		0.23744
YPDTEEIYKL	CAMSAP1	Calmodulin-regulated spectrin-associated protein 1	HLA-B35:02	0.0414	10		0.23742
HPDFPTVLTAL	SMC6	Structural maintenance of chromosomes protein 6	HLA-B35:02	0.2085	11		0.23738
QPDTIDHDL	CFD	Complement factor D	HLA-B35:02	0.0954	9		0.237
MPLPEEVTQIL	EFTUD1	Elongation factor Tu GTP-binding domain-containing protein 1	HLA-B35:02	0.1576	11		0.23698
MPDIIIKAL	TSC2	Tuberin	HLA-B35:02	0.0038	9		0.23686
HPVTGEAVV	PLEKHA5	Pleckstrin homology domain-containing family A member 5	HLA-B35:02	0.0349	9		0.23685
LPPGEYIL	CAPN2;CAPN9	Calpain-2 catalytic subunit;Calpain-9	HLA-B35:02	0.4254	8		0.23684
DASAEVERL	BST2	Bone marrow stromal antigen 2	HLA-B35:02	0.4474	9		0.23677
VPDEELDAL	BCR	Breakpoint cluster region protein	HLA-B35:02	0.0148	9		0.23659
YPYDGIHPDDL	LYN	Tyrosine-protein kinase Lyn	HLA-B35:02	0.0445	11		0.23646
EPVAEPDIM	TGFBI	Transforming growth factor-beta-induced protein ig-h3	HLA-B35:02	0.053	9		0.23631
HPDIENPDL	ZNF407	Zinc finger protein 407	HLA-B35:02	0.0555	9	Bruggeman et al., 2018	0.23613
LPSFDAHLTEL	AHCYL1	Putative adenosylhomocysteinase 2	HLA-B35:02	0.979	11		0.23612
LPIPGPVEEM	STAT5B;STAT5A	Signal transducer and activator of transcription 5B;Signal transducer and activator of transcription;Signal transducer and activator of transcription 5A	HLA-B35:02	0.0191	10		0.2361
DSANDGFVRL	HNRNPF	Heterogeneous nuclear ribonucleoprotein F;Heterogeneous nuclear ribonucleoprotein F, N-terminally processed	HLA-B35:02	1.437	10		0.23607
SANLEEVTM	DEK	Protein DEK	HLA-B35:02	0.2729	9		0.23601
LPEPPFPHAEL	INTS9	Integrator complex subunit 9	HLA-B35:02	0.5142	11		0.23571
NALEELGTL	HDGFRP2	Hepatoma-derived growth factor-related protein 2	HLA-B35:02	0.2516	9		0.23549
HPLGDIVAF	FASN	Fatty acid synthase;[Acyl-carrier-protein] S-acetyltransferase;[Acyl-carrier-protein] S-malonyltransferase;3-oxoacyl-[acyl-carrier-protein] synthase;3-oxoacyl-[acyl-carrier-protein] reductase;3-hydroxyacyl-[acyl-carrier-protein] dehydratase;Enoyl-[acyl-carrier-protein] reductase;Oleoyl-[acyl-carrier-protein] hydrolase	HLA-B35:02	0.0078	9		0.23508
LPVDDAINGL	IVD	Isovaleryl-CoA dehydrogenase, mitochondrial	HLA-B35:02	0.0835	10		0.23504
DAGFEISAM	NME7	Nucleoside diphosphate kinase 7	HLA-B35:02	0.3445	9		0.23482
HPDAFDNEL	UCK2	Uridine-cytidine kinase 2	HLA-B35:02	0.006	9		0.23449
GPDDAIDAL	CAST	Calpastatin	HLA-B35:02	0.0339	9		0.23448
LPTGTEATL	ARID1B	AT-rich interactive domain-containing protein 1B	HLA-B35:02	0.0096	9		0.23445
YADRLEAEM	ANKS3	Ankyrin repeat and SAM domain-containing protein 3	HLA-B35:02	0.1777	9		0.23425
SPPEVPEPTF	MANBAL	Protein MANBAL	HLA-B35:02	0.3501	10		0.23412
DAVFELISM	BROX	BRO1 domain-containing protein BROX	HLA-B35:02	0.213	9		0.23392
QPADAERAL	PABPC1;PABPC4;PABPC1L	Polyadenylate-binding protein 1;Polyadenylate-binding protein;Polyadenylate-binding protein 4;Polyadenylate-binding protein 1-like	HLA-B35:02	0.0272	9		0.23391
DQATAAETL	ARFGEF1	Brefeldin A-inhibited guanine nucleotide-exchange protein 1	HLA-B35:02	0.8895	9		0.23387
SPETRENAL	RQCD1	Cell differentiation protein RCD1 homolog	HLA-B35:02	0.1169	9		0.23361
IVDGHERAM	KAT5	Histone acetyltransferase KAT5;Histone acetyltransferase	HLA-B35:02	0.3931	9		0.23359
MPLPGVGEEL	AHCYL1	Putative adenosylhomocysteinase 2	HLA-B35:02	0.0326	10		0.23334
SPFHEHVL	HSPBP1	Hsp70-binding protein 1	HLA-B35:02	0.2216	8		0.23334
MITDLEERL	MYH9	Myosin-9	HLA-B35:02	1.6122	9		0.23311
LPETTFPAL	SYNRG	Synergin gamma	HLA-B35:02	0.0133	9		0.23306
IPDILDGPEL	IFI35	Interferon-induced 35 kDa protein	HLA-B35:02	0.1231	10		0.23296
LPAVGEHVF	CBX4	E3 SUMO-protein ligase CBX4	HLA-B35:02	0.0184	9		0.23291
VPDEVEYLL	DEF6	Differentially expressed in FDCP 6 homolog	HLA-B35:02	0.0152	9		0.2328
VPTDYVEIL	SNX9	Sorting nexin-9	HLA-B35:02	0.0227	9		0.23244
SPGEPERLY	ZSWIM4	Zinc finger SWIM domain-containing protein 4	HLA-B35:02	1.078	9		0.2324
FPDFPTPGVVF	APRT	Adenine phosphoribosyltransferase	HLA-B35:02	0.159	11		0.23206
MPANGETVTL	CPSF3L	Integrator complex subunit 11	HLA-B35:02	0.017	10		0.23075
TAAAAGEVL	RREB1	Ras-responsive element-binding protein 1	HLA-B35:02	0.1724	9		0.23069
LPSEVEPEL	C17orf75	Protein Njmu-R1	HLA-B35:02	0.0049	9		0.23064
HPDTVEGLVL	NDRG2	Protein NDRG2	HLA-B35:02	0.0529	10		0.23062
FPAAYVEEL	NOSTRIN	Nostrin	HLA-B35:02	0.002	9		0.23033
LPAPALEYETL	DST	Dystonin	HLA-B35:02	0.4684	11		0.23004
YPDAEAPEP	PTRF	Polymerase I and transcript release factor	HLA-B35:02	1.0464	9		0.23004
IPPDGDFEL	AP1M2	AP-1 complex subunit mu-2	HLA-B35:02	0.0317	9		0.2299
APAEDAVAA	PHLDA2	Pleckstrin homology-like domain family A member 2	HLA-B35:02	0.2503	9		0.22958
HADDFIQEM	TAP2	Antigen peptide transporter 2	HLA-B35:02	0.0413	9		0.22954
APEERPAAL	SLC22A18	Solute carrier family 22 member 18	HLA-B35:02	0.0555	9		0.22909
HPLHENEVL	ATN1	Atrophin-1	HLA-B35:02	0.0167	9		0.22898
SAIFPDVAL	SMYD2	N-lysine methyltransferase SMYD2	HLA-B35:02	0.0987	9		0.22878
KPIPFEPYI	NIPAL3	NIPA-like protein 3	HLA-B35:02	0.2184	9		0.22877
TPFNTREPVM	HLA-DMB	HLA class II histocompatibility antigen, DM beta chain	HLA-B35:02	0.2539	10		0.2287
YPSEFATYL	CSNK1D	Casein kinase I isoform delta	HLA-B35:02	0.0017	9		0.22848
DAVAGDFAL	ATE1	Arginyl-tRNA--protein transferase 1	HLA-B35:02	0.0349	9		0.22831
MPGVGDFAV	BMS1	Ribosome biogenesis protein BMS1 homolog	HLA-B35:02	0.0568	9		0.22808
LPVCAWGLL	CACNA2D4	Voltage-dependent calcium channel subunit alpha-2/delta-4;Voltage-dependent calcium channel subunit alpha-2-4;Voltage-dependent calcium channel subunit delta-4	HLA-B35:02	0.8187	9	Bruggeman et al., 2018	0.22788
MPADIATLL	SMARCAD1	SWI/SNF-related matrix-associated actin-dependent regulator of chromatin subfamily A containing DEAD/H box 1	HLA-B35:02	0.0013	9		0.22773
FPEIVAPLL	MVK	Mevalonate kinase	HLA-B35:02	0.0091	9		0.22761
YPNAELVFL	MTMR1	Myotubularin-related protein 1	HLA-B35:02	0.0047	9		0.22757
LPYSVIRGEEF	CD109	CD109 antigen	HLA-B35:02	0.9663	11		0.22743
MPDGEAALAA	KANK2	KN motif and ankyrin repeat domain-containing protein 2	HLA-B35:02	0.4813	10		0.22723
LPGLETVEM	RIF1	Telomere-associated protein RIF1	HLA-B35:02	0.0354	9		0.22722
VPSTEAEAL	GDI2	Rab GDP dissociation inhibitor beta	HLA-B35:02	0.0339	9		0.22705
VPFETIQAL	AGO2	Protein argonaute-2	HLA-B35:02	0.004	9		0.22693
LPSDFEHTI	PAK1;PAK3	Non-specific serine/threonine protein kinase;Serine/threonine-protein kinase PAK 1;Serine/threonine-protein kinase PAK 3	HLA-B35:02	0.012	9		0.22685
TVPEDTDPEL	BAHD1	Bromo adjacent homology domain-containing 1 protein	HLA-B35:02	0.4464	10		0.22657
HPGHVLPDEEL	SIGMAR1	Sigma non-opioid intracellular receptor 1	HLA-B35:02	0.6694	11		0.22603
QAIENAHVL	IREB2	Iron-responsive element-binding protein 2	HLA-B35:02	0.0452	9		0.2259
GPFDREHLL	TMOD3;TMOD2	Tropomodulin-3;Tropomodulin-2	HLA-B35:02	0.0639	9		0.22579
DATAIGDLL	KANSL2		HLA-B35:02	0.2354	9		0.22571
LPDEGAVDL	RC3H1	Roquin-1	HLA-B35:02	0.0092	9		0.22558
IPVEGELLF	ITGB4	Integrin beta-4	HLA-B35:02	0.0197	9		0.22556
NVDVGDFVL	PIK3C2B	Phosphatidylinositol 4-phosphate 3-kinase C2 domain-containing subunit beta	HLA-B35:02	0.3062	9		0.22554
LPATIGDLI	LRR1	Leucine-rich repeat protein 1	HLA-B35:02	0.0575	9		0.2255
HPIDIETSV	DIP2B;DIP2C;DIP2A	Disco-interacting protein 2 homolog B;Disco-interacting protein 2 homolog C;Disco-interacting protein 2 homolog A	HLA-B35:02	0.0077	9		0.22547
IVEEDDPEL	DNAJC8	DnaJ homolog subfamily C member 8	HLA-B35:02	0.8175	9		0.22487
APGPEEAL	PRRC2A	Protein PRRC2A	HLA-B35:02	1.7004	8		0.22461
FPIGPDVEDL	VCPIP1	Deubiquitinating protein VCIP135	HLA-B35:02	0.0254	10		0.22442
TAAEEARQM	IPO5	Importin-5	HLA-B35:02	0.2822	9		0.22378
IPIEDGSGEVVL	C3	Complement C3;Complement C3 beta chain;C3-beta-c;Complement C3 alpha chain;C3a anaphylatoxin;Acylation stimulating protein;Complement C3b alpha chain;Complement C3c alpha chain fragment 1;Complement C3dg fragment;Complement C3g fragment;Complement C3d fragment;Complement C3f fragment;Complement C3c alpha chain fragment 2	HLA-B35:02	0.164	12		0.22366
HPDVEVDGF	PARP1	Poly [ADP-ribose] polymerase 1	HLA-B35:02	0.131	9		0.22362
MPLSEDFVWM	HAUS4	HAUS augmin-like complex subunit 4	HLA-B35:02	0.1671	10		0.22349
APVFRDYVF	CECR1	Adenosine deaminase CECR1	HLA-B35:02	0.1782	9		0.22348
HVAGYEHEL	CEP164	Centrosomal protein of 164 kDa	HLA-B35:02	0.3062	9		0.22325
VPINVVETL	APOL4	Apolipoprotein L4	HLA-B35:02	0.0104	9		0.22293
APAADAIM	MCL1	Induced myeloid leukemia cell differentiation protein Mcl-1	HLA-B35:02	0.6569	8		0.22282
HPEPGTWDSF	SULT1A1;SULT1A4;SULT1A3	Sulfotransferase;Sulfotransferase 1A1;Sulfotransferase 1A4;Sulfotransferase 1A3	HLA-B35:02	0.1993	10		0.22271
QPTGENEM	TXNIP	Thioredoxin-interacting protein	HLA-B35:02	1.4867	8		0.22261
LPAATPEEL	ALPK3	Alpha-protein kinase 3	HLA-B35:02	0.0069	9		0.22243
FPAPEVEV	TMEM218	Transmembrane protein 218	HLA-B35:02	0.128	8		0.2224
FPEHLIDVL	ADCK3	Atypical kinase ADCK3, mitochondrial	HLA-B35:02	0.0058	9		0.22237
TPDNDIYIA	KBTBD2	Kelch repeat and BTB domain-containing protein 2	HLA-B35:02	0.3269	9		0.22221
IPENVDITL	RPL9	60S ribosomal protein L9	HLA-B35:02	0.0083	9		0.22207
MPHVPITTL	NIPBL	Nipped-B-like protein	HLA-B35:02	0.0049	9		0.22196
PLEDEATL	FAU	Ubiquitin-like protein FUBI	HLA-B35:02	1.4436	8		0.22191
LPRNEADEL	APOL1	Apolipoprotein L1	HLA-B35:02	0.0911	9		0.22184
HPEGEAPRL	APOBR	Apolipoprotein B receptor	HLA-B35:02	0.0398	9		0.22181
HPACVNEIAL	FMNL1	Formin-like protein 1	HLA-B35:02	0.1223	10		0.22178
MPLAEAGAL	C6orf223	Uncharacterized protein C6orf223	HLA-B35:02	0.0088	9		0.22156
HPDGVIPVL	NDUFS3	NADH dehydrogenase [ubiquinone] iron-sulfur protein 3, mitochondrial	HLA-B35:02	0.0025	9		0.22154
TVEAFDPVL	DKFZp781C1855;KLHL8	Kelch-like protein 8	HLA-B35:02	0.8499	9		0.22151
FPEGLFYEF	LIMS1;LIMS2	LIM and senescent cell antigen-like-containing domain protein 1;LIM and senescent cell antigen-like-containing domain protein 2	HLA-B35:02	0.0335	9		0.22138
DPDIGPVTL	HMCN2	Hemicentin-2	HLA-B35:02	0.0097	9		0.2212
QPDVVVVEL	TRABD	TraB domain-containing protein	HLA-B35:02	0.0136	9		0.22114
YPDDRTARTL	DAB2IP	Disabled homolog 2-interacting protein	HLA-B35:02	0.0116	10		0.22091
SADDAEVVL	MDN1	Midasin	HLA-B35:02	0.0678	9		0.22083
YPDLAEVHAL	TTC37	Tetratricopeptide repeat protein 37	HLA-B35:02	0.009	10		0.22066
YPETLVNLIVL	COPE	Coatomer subunit epsilon	HLA-B35:02	0.5112	11		0.22066
LPVDDFNEL	NFE2	Transcription factor NF-E2 45 kDa subunit	HLA-B35:02	0.003	9		0.22056
LPYGREDVL	CTSS	Cathepsin S	HLA-B35:02	0.0091	9		0.22039
HPHGLEFLF	RIOK3	Serine/threonine-protein kinase RIO3	HLA-B35:02	0.084	9		0.22037
TAFGGRRAV	F13A1	Coagulation factor XIII A chain	HLA-B35:02	0.3903	9		0.22036
LPEGGETPL	GSN	Gelsolin	HLA-B35:02	0.0246	9		0.22013
YAIEVDPVL	NT5C3A	5-nucleotidase;Cytosolic 5-nucleotidase 3A	HLA-B35:02	0.0209	9		0.21979
FSEETPVVL	ATP6AP2	Renin receptor	HLA-B35:02	0.2604	9		0.21957
MAVIDGNVM	CLUH	Clustered mitochondria protein homolog	HLA-B35:02	0.1041	9		0.21948
TATTEDPEL	FUT11	Alpha-(1,3)-fucosyltransferase 11	HLA-B35:02	0.6796	9		0.21918
YPDTDVIL	RHOA;RHOC;RHOB	Transforming protein RhoA;Rho-related GTP-binding protein RhoB;Rho-related GTP-binding protein RhoC	HLA-B35:02	0.0399	8		0.21904
FPVEDGGTL	ARHGEF26	Rho guanine nucleotide exchange factor 26	HLA-B35:02	0.0019	9		0.21893
FVAEYEPVL	PSAP	Prosaposin;Saposin-A;Saposin-B-Val;Saposin-B;Saposin-C;Saposin-D	HLA-B35:02	0.1986	9		0.21886
HPYFYAPELL	ALB	Serum albumin	HLA-B35:02	0.1909	10		0.21868
IPEVELVTL	PRX	Periaxin	HLA-B35:02	0.0213	9		0.21862
TPSPDIIVL	GATAD2B	Transcriptional repressor p66-beta	HLA-B35:02	0.0038	9		0.21846
QPNGGEPFL	UCK2	Uridine-cytidine kinase 2	HLA-B35:02	0.0728	9		0.21829
IPDGGVHII	RBM12B	RNA-binding protein 12B	HLA-B35:02	0.0154	9	Bruggeman et al., 2018	0.21822
IPDGGVHIV	RBM12	RNA-binding protein 12	HLA-B35:02	0.019	9		0.21822
SPDEHEPLL	BMPR2	Bone morphogenetic protein receptor type-2	HLA-B35:02	0.0174	9		0.21786
LPEGGETPLF	GSN	Gelsolin	HLA-B35:02	0.3238	10		0.2178
VASHIANIL	APOB	Apolipoprotein B-100;Apolipoprotein B-48	HLA-B35:02	0.4823	9		0.21758
APDEIPYLL	DDX54	ATP-dependent RNA helicase DDX54	HLA-B35:02	0.0182	9		0.21751
FPMPEDFPNFL	FMO2	Dimethylaniline monooxygenase [N-oxide-forming] 2	HLA-B35:02	0.1396	11		0.21744
YPDATPEEL	SYVN1	E3 ubiquitin-protein ligase synoviolin	HLA-B35:02	0.0027	9		0.21693
HPDPRTPEEL	COL15A1	Collagen alpha-1(XV) chain;Restin;Restin-2;Restin-3;Restin-4	HLA-B35:02	0.0652	10		0.2168
LPEPEELDL	IGF1R	Tyrosine-protein kinase receptor;Insulin-like growth factor 1 receptor;Insulin-like growth factor 1 receptor alpha chain;Insulin-like growth factor 1 receptor beta chain	HLA-B35:02	0.0938	9		0.21669
APETNETVM	ZC3H7A	Zinc finger CCCH domain-containing protein 7A	HLA-B35:02	0.1263	9		0.21639
MPSVPDFETL	COPS3	COP9 signalosome complex subunit 3	HLA-B35:02	0.0427	10		0.21602
HPETGLFTL	AGER	Advanced glycosylation end product-specific receptor	HLA-B35:02	0.0082	9		0.2156
IPDHHAEAF	PIGV	GPI mannosyltransferase 2	HLA-B35:02	0.0304	9		0.21544
HAGDVEGHL	APOA4	Apolipoprotein A-IV	HLA-B35:02	1.1957	9		0.21527
TPNHVEHTL	TNS1	Tensin-1	HLA-B35:02	0.008	9		0.21488
LPTENELTF	NCKAP1	Nck-associated protein 1	HLA-B35:02	0.012	9		0.21462
MPTIQITAL	HEATR1	HEAT repeat-containing protein 1;HEAT repeat-containing protein 1, N-terminally processed	HLA-B35:02	0.0049	9		0.21462
FPAYERVVL	TJP1	Tight junction protein ZO-1	HLA-B35:02	0.0035	9		0.21416
LPHTDFTL	EIF3K	Eukaryotic translation initiation factor 3 subunit K	HLA-B35:02	0.2757	8		0.21412
LPVNDEHVTV	CCNA2	Cyclin-A2	HLA-B35:02	0.2385	10		0.21396
VPDDAVEAL	CAST	Calpastatin	HLA-B35:02	0.0045	9		0.21384
EPTPEAELL	HEXIM1	Protein HEXIM1	HLA-B35:02	0.0693	9		0.21379
HAIAGELDL	NVL	Nuclear valosin-containing protein-like	HLA-B35:02	0.3095	9		0.21342
HPDIESERYM	ACOX2	Peroxisomal acyl-coenzyme A oxidase 2;Acyl-coenzyme A oxidase	HLA-B35:02	0.227	10		0.21329
SSFFDDPVL	CREB3L1	Cyclic AMP-responsive element-binding protein 3-like protein 1;Processed cyclic AMP-responsive element-binding protein 3-like protein 1	HLA-B35:02	1.2382	9		0.21304
IPEPEAAVL	TRIB3	Tribbles homolog 3	HLA-B35:02	0.0061	9		0.21281
TPDGIDLRL	CPT1A	Carnitine O-palmitoyltransferase 1, liver isoform	HLA-B35:02	0.0245	9		0.21266
YPDTDVILM	RHOA;RHOC;RHOB	Transforming protein RhoA;Rho-related GTP-binding protein RhoB;Rho-related GTP-binding protein RhoC	HLA-B35:02	0.0024	9		0.21256
TPEGEFVSM	MDH1	Malate dehydrogenase, cytoplasmic	HLA-B35:02	0.0128	9		0.21248
DVQGPDWHL	AHNAK	Neuroblast differentiation-associated protein AHNAK	HLA-B35:02	0.848	9		0.21242
NVQGPDWHL	AHNAK	Neuroblast differentiation-associated protein AHNAK	HLA-B35:02	1.2956	9		0.21242
SEADAGETL	SON	Protein SON	HLA-B35:02	0.8086	9		0.2122
LPEWKENIM	TCAF1	TRPM8 channel-associated factor 1	HLA-B35:02	0.0982	9		0.21194
EPAEPEPVI	BRD8	Bromodomain-containing protein 8	HLA-B35:02	0.054	9		0.21166
LPDIALDVF	FRMD8;FRMD8P1	FERM domain-containing protein 8;Putative FERM domain-containing protein FRMD8P1	HLA-B35:02	0.0627	9		0.21162
HPCRHAEVM	ATG3	Ubiquitin-like-conjugating enzyme ATG3	HLA-B35:02	0.2908	9		0.21153
IPLHEELL	ARHGEF3	Rho guanine nucleotide exchange factor 3	HLA-B35:02	0.8474	8		0.21134
MALFEQEVL	RBM42	RNA-binding protein 42	HLA-B35:02	0.3398	9		0.21128
DAIAELDTL	YWHAG;YWHAE;YWHAH	14-3-3 protein gamma;14-3-3 protein gamma, N-terminally processed;14-3-3 protein epsilon;14-3-3 protein eta	HLA-B35:02	0.1016	9		0.21103
EAIAELDTL	YWHAZ;YWHAQ	14-3-3 protein zeta/delta;14-3-3 protein theta	HLA-B35:02	0.1349	9		0.21103
LPDERTISL	CSTF1	Cleavage stimulation factor subunit 1	HLA-B35:02	0.0035	9		0.21055
HPDYAEYIF	ZMYND8	Protein kinase C-binding protein 1	HLA-B35:02	0.0316	9		0.21047
AAAELEPAL	SNTB2	Beta-2-syntrophin	HLA-B35:02	0.2187	9		0.2104
DAEDPLFIL	ACSS2	Acetyl-coenzyme A synthetase, cytoplasmic	HLA-B35:02	0.1642	9		0.21014
LPDPIGTGL	ITPR3	Inositol 1,4,5-trisphosphate receptor type 3	HLA-B35:02	0.0058	9		0.2101
SPQEDGVEL	TOP2A	DNA topoisomerase 2-alpha	HLA-B35:02	0.0168	9		0.20999
HPIDFETSL	PSD3	PH and SEC7 domain-containing protein 3	HLA-B35:02	0.0027	9		0.20987
FPDDVVTFI	SEMA3C	Semaphorin-3C	HLA-B35:02	0.0088	9		0.20974
EPHIEAHSL	ARID4A	AT-rich interactive domain-containing protein 4A	HLA-B35:02	0.0474	9		0.20939
VPDHVVWSL	IFITM3;IFITM2;IFITM1	Interferon-induced transmembrane protein 3;Interferon-induced transmembrane protein 1;Interferon-induced transmembrane protein 2	HLA-B35:02	0.0198	9		0.20909
FPIGEKQDIWAL	GAK	Cyclin-G-associated kinase	HLA-B35:02	0.2355	12		0.20868
MPDGEAAL	KANK2	KN motif and ankyrin repeat domain-containing protein 2	HLA-B35:02	0.039	8		0.20865
LPDFGGNVL	SEC16A	Protein transport protein Sec16A	HLA-B35:02	0.0045	9		0.20856
TPDEDYEYM	ERBB3	Receptor tyrosine-protein kinase erbB-3	HLA-B35:02	0.022	9		0.20841
MAEERAESL	DKFZp686E0752;DCTN1	Dynactin subunit 1	HLA-B35:02	0.19	9		0.20832
DVIPEDHRL	TXNIP	Thioredoxin-interacting protein	HLA-B35:02	0.2638	9		0.20796
EAAEEDRQL	IWS1	Protein IWS1 homolog	HLA-B35:02	0.2686	9		0.20783
IPIERESEL	VPS13D	Vacuolar protein sorting-associated protein 13D	HLA-B35:02	0.0116	9		0.20748
SPHLEEISL	NLRC5	Protein NLRC5	HLA-B35:02	0.0366	9		0.20675
MPSLEVITL	C21orf2	Protein C21orf2	HLA-B35:02	0.0031	9		0.2065
DPEEDAPVL	PRPF8	Pre-mRNA-processing-splicing factor 8	HLA-B35:02	0.0523	9		0.20644
VPDENNTIL	SCAPER	S phase cyclin A-associated protein in the endoplasmic reticulum	HLA-B35:02	0.0073	9		0.20608
MPEQWARLL	PAK1;PAK2	Non-specific serine/threonine protein kinase;Serine/threonine-protein kinase PAK 1;Serine/threonine-protein kinase PAK 2;PAK-2p27;PAK-2p34	HLA-B35:02	0.0405	9		0.20567
SPIPNAEEL	DAAM2	Disheveled-associated activator of morphogenesis 2	HLA-B35:02	0.0098	9		0.20557
YPDTDVFL	RHOV	Rho-related GTP-binding protein RhoV	HLA-B35:02	0.0742	8		0.20552
TVMENFVAF			HLA-B35:02	0.1719	9		0.20535
FPVEVNTVL	PRMT5	Protein arginine N-methyltransferase 5;Protein arginine N-methyltransferase 5, N-terminally processed	HLA-B35:02	0.0009	9		0.20514
DVAEDDPEL	MCM7	DNA replication licensing factor MCM7	HLA-B35:02	0.2518	9		0.20507
YPEGAPAIL	METTL2B	Methyltransferase-like protein 2B	HLA-B35:02	0.0035	9		0.20504
YPDINDPEF	CNGA1	cGMP-gated cation channel alpha-1	HLA-B35:02	0.0058	9		0.20484
LPVDLAEEL	CDKN2A	Cyclin-dependent kinase inhibitor 2A	HLA-B35:02	0.0041	9		0.20475
FPWGDGNHTL	COX6A1	Cytochrome c oxidase subunit 6A1, mitochondrial	HLA-B35:02	0.0066	10		0.20449
TPHPEEPTV	DHRS13	Dehydrogenase/reductase SDR family member 13	HLA-B35:02	0.0604	9		0.20441
EADRLITYL	CUL4B	Cullin-4B	HLA-B35:02	0.2852	9		0.20436
IPEEQRIAM	RNF123	E3 ubiquitin-protein ligase RNF123	HLA-B35:02	0.0095	9		0.20435
NPETDTYIL	F13A1	Coagulation factor XIII A chain	HLA-B35:02	0.0333	9		0.20434
MIHEPEPHI	CKS1B;CKS2	Cyclin-dependent kinases regulatory subunit;Cyclin-dependent kinases regulatory subunit 1;Cyclin-dependent kinases regulatory subunit 2	HLA-B35:02	1.9919	9		0.20424
GPDGGEEVSM	KLC1	Kinesin light chain 1	HLA-B35:02	0.3968	10		0.20423
SPLAVDEAL	MICAL3	Protein-methionine sulfoxide oxidase MICAL3	HLA-B35:02	0.0232	9		0.20421
FPLDEVDRL	PLXNB1	Plexin-B1	HLA-B35:02	0.0053	9		0.20404
HPEDTEEQL	INADL	InaD-like protein	HLA-B35:02	0.034	9		0.20369
QPIGPEDVL	UNC119	Protein unc-119 homolog A	HLA-B35:02	0.0309	9		0.20359
FAPEEISAM	HSPA5	78 kDa glucose-regulated protein	HLA-B35:02	0.0717	9		0.20317
HPEDVEPAL	AKR1A1	Alcohol dehydrogenase [NADP(+)]	HLA-B35:02	0.005	9		0.20277
SPQTEEPHL	KMT2D	Histone-lysine N-methyltransferase 2D	HLA-B35:02	0.2568	9		0.20275
QPHPFDPIL	DCAF6	DDB1- and CUL4-associated factor 6	HLA-B35:02	0.0331	9		0.20262
DVAFTDPTL	INPP1	Inositol polyphosphate 1-phosphatase	HLA-B35:02	0.2495	9		0.2025
YPETLGRLLIL	SEC14L1	SEC14-like protein 1	HLA-B35:02	0.9765	11		0.20212
DPAGGGDPIL	MT-CO1	Cytochrome c oxidase subunit 1	HLA-B35:02	0.3735	10		0.20208
YPYYTPTGEPVF	HYAL1	Hyaluronidase;Hyaluronidase-1	HLA-B35:02	0.2359	12		0.20189
FPDFTNPTAL	GAA	Lysosomal alpha-glucosidase;76 kDa lysosomal alpha-glucosidase;70 kDa lysosomal alpha-glucosidase	HLA-B35:02	0.0084	10		0.20168
TAATETISL	DMWD	Dystrophia myotonica WD repeat-containing protein	HLA-B35:02	0.1174	9		0.20146
EPAEGEQEL	SSH2	Protein phosphatase Slingshot homolog 2	HLA-B35:02	0.0226	9		0.20144
YPATGADVAF	YIF1A	Protein YIF1A	HLA-B35:02	0.0254	10		0.20144
VIQENEHAL	SMC4	Structural maintenance of chromosomes protein;Structural maintenance of chromosomes protein 4	HLA-B35:02	0.5899	9		0.20126
HPVSREWTL	MCM2	DNA replication licensing factor MCM2	HLA-B35:02	0.0174	9		0.2012
DADGHAAEL	STRIP2	Striatin-interacting protein 2	HLA-B35:02	0.0515	9		0.20115
QPIPILYEHQL	PRRC2C	Protein PRRC2C	HLA-B35:02	0.5944	11		0.20111
DPEQEEVEL	MEA1	Male-enhanced antigen 1	HLA-B35:02	0.118	9		0.20103
TAIEAEHML	GYS2	Glycogen [starch] synthase, liver	HLA-B35:02	0.0986	9		0.201
SPLEDEESL	CLSPN	Claspin	HLA-B35:02	0.0365	9	Bruggeman et al., 2018	0.20084
LPLDTAETL	KLHDC8B	Kelch domain-containing protein 8B	HLA-B35:02	0.0044	9		0.20053
LPTVDPIAV	PBRM1	Protein polybromo-1	HLA-B35:02	0.037	9		0.20048
SAVVHEYAL	SOAT1	Sterol O-acyltransferase 1	HLA-B35:02	0.2766	9		0.20043
IPDGEITSI	LNX1	E3 ubiquitin-protein ligase LNX	HLA-B35:02	0.018	9		0.20018
MPEEDPATL	HIDE1	Protein HIDE1	HLA-B35:02	0.0022	9		0.20011
TPIRDGALTL	METTL18	Histidine protein methyltransferase 1 homolog	HLA-B35:02	0.0364	10		0.20003
HPQFVTDVM	ABCE1	ATP-binding cassette sub-family E member 1	HLA-B35:02	0.0116	9		0.19978
LPHYEPIPF	OCIAD1	OCIA domain-containing protein 1	HLA-B35:02	0.0551	9		0.19968
LPIENTTDCL	FAM49B;FAM49A	Protein FAM49B;Protein FAM49A	HLA-B35:02	0.238	10		0.19921
DTYPEEYAL	PFKFB3	6-phosphofructo-2-kinase/fructose-2,6-bisphosphatase 3;6-phosphofructo-2-kinase;Fructose-2,6-bisphosphatase	HLA-B35:02	0.1859	9		0.19913
VDAEALVAL	NDUFS1	NADH-ubiquinone oxidoreductase 75 kDa subunit, mitochondrial	HLA-B35:02	1.0072	9		0.19881
LPSHVTEEM	QRICH1	Glutamine-rich protein 1	HLA-B35:02	0.0159	9		0.19859
MPDEATPHYF	MAN2A1	Alpha-mannosidase 2	HLA-B35:02	0.0342	10		0.19855
EPDAINVLI	KMT2B	Histone-lysine N-methyltransferase 2B	HLA-B35:02	0.0496	9		0.19844
SPSTGEHEL	CCR1	C-C chemokine receptor type 1	HLA-B35:02	0.0416	9		0.19841
LPAHLDEEL	SFTPA1;SFTPA2	Pulmonary surfactant-associated protein A1;Pulmonary surfactant-associated protein A2	HLA-B35:02	0.0182	9		0.19833
QADPFAHVA	FIG4	Polyphosphoinositide phosphatase	HLA-B35:02	0.8549	9		0.19829
LPQEEDYGF	PREX1	Phosphatidylinositol 3,4,5-trisphosphate-dependent Rac exchanger 1 protein	HLA-B35:02	0.1196	9		0.19821
APQPTEERL	CTTN	Src substrate cortactin	HLA-B35:02	0.2436	9		0.19803
HAFPEGDAL	LGALS9		HLA-B35:02	0.0385	9		0.19782
IPTDVEVLP	MKI67	Antigen KI-67	HLA-B35:02	1.5062	9		0.19773
FPDYLEAIP	YAP1	Transcriptional coactivator YAP1	HLA-B35:02	1.3136	9		0.19771
LPAPFEESL	PARP14	Poly [ADP-ribose] polymerase 14	HLA-B35:02	0.0072	9		0.19763
SADPEEYDL	POR	NADPH--cytochrome P450 reductase	HLA-B35:02	0.6188	9		0.19763
YPIPREHLI	ZFYVE26	Zinc finger FYVE domain-containing protein 26	HLA-B35:02	0.0149	9		0.19751
IADEGTYTL	MYO5A	Unconventional myosin-Va	HLA-B35:02	0.0309	9		0.19705
FPDGEDRPV	PYY	Peptide YY;Peptide YY(3-36)	HLA-B35:02	0.0514	9		0.19688
GPSGDFEL	SDC3	Syndecan;Syndecan-3	HLA-B35:02	1.2983	8		0.1967
DSTNVEAAF	RAB11A	Ras-related protein Rab-11A	HLA-B35:02	1.3809	9		0.19642
IPVAIRTQI	DNAH1	Dynein heavy chain 1, axonemal	HLA-B35:02	0.1428	9		0.19617
YPFIGDVHSL	TBC1D5	TBC1 domain family member 5	HLA-B35:02	0.0075	10		0.19602
LPFPEVTL	AHCTF1	Protein ELYS	HLA-B35:02	0.0565	8		0.19596
IAAPELETL	MPP6	MAGUK p55 subfamily member 6	HLA-B35:02	0.2962	9		0.19578
TATLHEPIM	GAPVD1	GTPase-activating protein and VPS9 domain-containing protein 1	HLA-B35:02	0.738	9		0.19559
TPFYGDEAL	JUND	Transcription factor jun-D	HLA-B35:02	0.0051	9		0.19552
VPCGEPAEL	SALL2		HLA-B35:02	0.1466	9		0.19518
NPCFPIQII			HLA-B35:02	0.6228	9		0.19478
DAFEEKANIVM	MYLK	Myosin light chain kinase, smooth muscle;Myosin light chain kinase, smooth muscle, deglutamylated form	HLA-B35:02	1.0468	11		0.1947
FPVGRVHRL	HIST1H2AG;HIST1H2AB;HIST1H2AC;HIST2H2AA3;HIST1H2AD;HIST3H2A;HIST2H2AB;HIST2H2AC;HIST1H2AJ;H2AFJ;H2AFX;HIST1H2AH	Histone H2A type 1;Histone H2A type 1-B/E;Histone H2A type 1-C;Histone H2A type 2-A;Histone H2A type 1-D;Histone H2A type 3;Histone H2A type 2-B;Histone H2A type 2-C;Histone H2A type 1-J;Histone H2A.J;Histone H2AX;Histone H2A type 1-H	HLA-B35:02	0.0087	9		0.1943
LPDPTGIFSL	NRK	Nik-related protein kinase	HLA-B35:02	0.0244	10		0.19426
PDALFNEL	STXBP1	Syntaxin-binding protein 1	HLA-B35:02	1.1621	8		0.19395
QPEHRDVTL	PPL	Periplakin	HLA-B35:02	0.0812	9		0.19385
NATAVVRHM	CAMK1;CAMK1D	Calcium/calmodulin-dependent protein kinase type 1;Calcium/calmodulin-dependent protein kinase type 1D	HLA-B35:02	0.6014	9		0.19361
LPQPEVILL	CBX4	E3 SUMO-protein ligase CBX4	HLA-B35:02	0.009	9		0.19344
LPVEEAVKGIL	COPS8	COP9 signalosome complex subunit 8	HLA-B35:02	0.5614	11		0.19331
SPEAVGPEL	PWWP2A	PWWP domain-containing protein 2A	HLA-B35:02	0.0183	9		0.19311
TAEEYAALL	NMRAL1	NmrA-like family domain-containing protein 1	HLA-B35:02	0.352	9		0.19302
EAALEAAVL	FAM120A	Constitutive coactivator of PPAR-gamma-like protein 1	HLA-B35:02	0.1486	9		0.19301
MPDTPDIVL	NEB	Nebulin	HLA-B35:02	0.0033	9		0.19278
RPLEEDCTL	TARS	Threonine--tRNA ligase, cytoplasmic	HLA-B35:02	0.1599	9		0.19271
HPDVVYETM	APPL1	DCC-interacting protein 13-alpha	HLA-B35:02	0.0058	9		0.19264
LPHLEAVVI	APTX	Aprataxin	HLA-B35:02	0.0596	9		0.19263
LPEVDPETM	DPYD	Dihydropyrimidine dehydrogenase [NADP(+)]	HLA-B35:02	0.0337	9		0.19238
MVETHDPIL	TP53BP1	Tumor suppressor p53-binding protein 1	HLA-B35:02	0.6191	9		0.19234
IPAGTELTF	WHSC1	Histone-lysine N-methyltransferase NSD2	HLA-B35:02	0.019	9		0.19217
HVVLEATTM	MYO9B	Unconventional myosin-IXb	HLA-B35:02	0.3871	9		0.19201
DPFSFDGPEIM	NAP1L1	Nucleosome assembly protein 1-like 1	HLA-B35:02	0.425	11		0.19195
GPDRLEPEM	NAB2	NGFI-A-binding protein 2	HLA-B35:02	0.2088	9		0.19187
LPQPTEINL	MTRF1L	Peptide chain release factor 1-like, mitochondrial	HLA-B35:02	0.0172	9		0.19183
MPYSVIRGEAF	A2M	Alpha-2-macroglobulin	HLA-B35:02	0.3675	11		0.19179
HPIRVVNAL	C10orf76	UPF0668 protein C10orf76	HLA-B35:02	0.0062	9		0.19174
FPDVTYEVL	ERMARD	Endoplasmic reticulum membrane-associated RNA degradation protein	HLA-B35:02	0.0051	9		0.19168
LPDVEPAAF	BTBD2;BTBD1	BTB/POZ domain-containing protein 1;BTB/POZ domain-containing protein 2	HLA-B35:02	0.0189	9		0.19168
LPAPAEVAA	MLH1	DNA mismatch repair protein Mlh1	HLA-B35:02	0.0649	9		0.19159
LPNNAERVL	DYNC1H1	Cytoplasmic dynein 1 heavy chain 1	HLA-B35:02	0.0366	9		0.19154
DADARAVAL	SPSB3	SPRY domain-containing SOCS box protein 3	HLA-B35:02	0.0527	9		0.1915
EAERLGHEL	NUMA1	Nuclear mitotic apparatus protein 1	HLA-B35:02	0.3174	9		0.19148
FPEPFVNTL	EOMES	Eomesodermin homolog	HLA-B35:02	0.0018	9		0.19142
LPDDFIDSL	NLN	Neurolysin, mitochondrial	HLA-B35:02	0.0069	9		0.19086
HPEEGDLDL	SAFB;SAFB2	Scaffold attachment factor B1;Scaffold attachment factor B2	HLA-B35:02	0.0442	9		0.19073
GPPDDEAAM	EEF2	Elongation factor 2	HLA-B35:02	0.1509	9		0.19045
LPAPPHIDVM	NCBP1	Nuclear cap-binding protein subunit 1	HLA-B35:02	0.0371	10		0.19036
NPTNADIDL	H2AFY	Core histone macro-H2A.1	HLA-B35:02	0.0934	9		0.19035
MPEDLVEAL	HSD17B4	Peroxisomal multifunctional enzyme type 2;(3R)-hydroxyacyl-CoA dehydrogenase;Enoyl-CoA hydratase 2	HLA-B35:02	0.0024	9		0.19024
QPDNIVYVM	SRP54	Signal recognition particle 54 kDa protein	HLA-B35:02	0.0074	9		0.19015
MPTTELGTL	LYL1	Protein lyl-1	HLA-B35:02	0.031	9		0.19
EAAGEGPAL	APEX1	DNA-(apurinic or apyrimidinic site) lyase;DNA-(apurinic or apyrimidinic site) lyase, mitochondrial	HLA-B35:02	0.0457	9		0.1897
TPEGHAVGL	POLR2B	DNA-directed RNA polymerase;DNA-directed RNA polymerase II subunit RPB2	HLA-B35:02	0.0385	9		0.18957
NPHEGEDQV	MLX	Max-like protein X	HLA-B35:02	0.168	9		0.18954
TAHGEDALL	MSH2	DNA mismatch repair protein Msh2	HLA-B35:02	0.5238	9		0.18952
LPEADVAVF	TEP1	Telomerase protein component 1	HLA-B35:02	0.0231	9		0.18947
LPDINIYQL	SMYD3	Histone-lysine N-methyltransferase SMYD3	HLA-B35:02	0.0102	9		0.1893
LPVEEPNPA	IER3	Radiation-inducible immediate-early gene IEX-1	HLA-B35:02	0.2593	9		0.18927
LPDHPIVL	C8orf88	Uncharacterized protein C8orf88	HLA-B35:02	0.0978	8		0.18907
LPALVDAGTAL	AP5Z1	AP-5 complex subunit zeta-1	HLA-B35:02	0.1065	11		0.18896
LPHEELLL	LBHD1	LBH domain-containing protein 1	HLA-B35:02	0.3955	8		0.18895
YAPEDDPEM	ZPR1	Zinc finger protein ZPR1	HLA-B35:02	0.1554	9		0.18877
IPQDGDYEFL	STK4	Serine/threonine-protein kinase 4;Serine/threonine-protein kinase 4 37kDa subunit;Serine/threonine-protein kinase 4 18kDa subunit	HLA-B35:02	0.1725	10		0.18874
NPIGFVEKL	ZZZ3	ZZ-type zinc finger-containing protein 3	HLA-B35:02	0.018	9		0.18866
VPIYEGYAL	ACTB;ACTBL2;ACTG2;ACTA1;ACTC1;ACTA2;ACTG1	Actin, cytoplasmic 1;Actin, cytoplasmic 1, N-terminally processed;Beta-actin-like protein 2;Actin, gamma-enteric smooth muscle;Actin, alpha skeletal muscle;Actin, alpha cardiac muscle 1;Actin, aortic smooth muscle;Actin, cytoplasmic 2;Actin, cytoplasmic 2, N-terminally processed	HLA-B35:02	0.0063	9		0.18862
HPESGEEAVAL	SCAND2P;ZSCAN20	Putative SCAN domain-containing protein SCAND2P;Zinc finger and SCAN domain-containing protein 20	HLA-B35:02	0.227	11	Bruggeman et al., 2018	0.18856
HPQYEVVEI	TNPO3	Transportin-3	HLA-B35:02	0.0314	9		0.18838
APDEYIEKL	PAH	Phenylalanine-4-hydroxylase	HLA-B35:02	0.0528	9		0.18813
VALDFEQEM	ACTB;ACTBL2;ACTG1;POTEE;POTEF;POTEJ;POTEI	Actin, cytoplasmic 1;Actin, cytoplasmic 1, N-terminally processed;Beta-actin-like protein 2;Actin, cytoplasmic 2;Actin, cytoplasmic 2, N-terminally processed;POTE ankyrin domain family member E;POTE ankyrin domain family member F;POTE ankyrin domain family member J;POTE ankyrin domain family member I	HLA-B35:02	0.2762	9	CTDatabase;Da Silva et al., 2017	0.18771
IPDEISILL	SERPINF1	Pigment epithelium-derived factor	HLA-B35:02	0.0043	9		0.18766
FPQIEINKM	DNAJC11	DnaJ homolog subfamily C member 11	HLA-B35:02	0.0109	9		0.18764
VADPVEAVL	NUMA1	Nuclear mitotic apparatus protein 1	HLA-B35:02	0.0837	9		0.18763
RPHPAEATL	UBXN11	UBX domain-containing protein 11	HLA-B35:02	0.0597	9		0.18739
FADQVEEIL	DDX21	Nucleolar RNA helicase 2	HLA-B35:02	0.1677	9		0.18735
HPEVAPDVRL	TLN1	Talin-1	HLA-B35:02	0.1742	10		0.1873
LPFDDDHVPTL	PRKAA1	5-AMP-activated protein kinase catalytic subunit alpha-1	HLA-B35:02	0.072	11		0.1872
EPELGLEEL	HSPBP1	Hsp70-binding protein 1	HLA-B35:02	0.0903	9		0.1869
TADAGYAIL	RBM10	RNA-binding protein 10	HLA-B35:02	0.1691	9		0.18687
TADDLIDVV	DRG1	Developmentally-regulated GTP-binding protein 1	HLA-B35:02	0.413	9		0.18684
FPVAEDISL	ASCC2	Activating signal cointegrator 1 complex subunit 2	HLA-B35:02	0.0016	9		0.18681
EAFDGARDM	SAA1;SAA2;SAA2-SAA4	Serum amyloid A protein;Serum amyloid A-1 protein;Amyloid protein A;Serum amyloid protein A(2-104);Serum amyloid protein A(3-104);Serum amyloid protein A(2-103);Serum amyloid protein A(2-102);Serum amyloid protein A(4-101);Serum amyloid A-2 protein	HLA-B35:02	0.1563	9		0.18679
DPEGTENPL	SLA	Src-like-adapter	HLA-B35:02	0.1722	9		0.18671
QPINETDTPAQL	SUMO2;SUMO3	Small ubiquitin-related modifier 2;Small ubiquitin-related modifier 3	HLA-B35:02	0.6213	12		0.18629
LPDWRQPVF	DNAJC1	DnaJ homolog subfamily C member 1	HLA-B35:02	0.0517	9		0.18621
FAEDGPEVL	IFRD1	Interferon-related developmental regulator 1	HLA-B35:02	0.053	9		0.186
DEDAIISVL	ANXA4	Annexin;Annexin A4	HLA-B35:02	0.6726	9		0.18595
LPDDGVEL	SERPINB9	Serpin B9	HLA-B35:02	0.0864	8		0.18588
LPDLTEVTL	ALMS1	Alstrom syndrome protein 1	HLA-B35:02	0.006	9		0.18561
HPDFPTVL	SMC6	Structural maintenance of chromosomes protein 6	HLA-B35:02	0.0738	8		0.18558
IPVEEPLPF	C20orf96	Uncharacterized protein C20orf96	HLA-B35:02	0.0234	9		0.18537
QVDDGEVPL	TP53BP2	Apoptosis-stimulating of p53 protein 2	HLA-B35:02	0.4007	9		0.18513
LPAADPFAL	AAK1	Uncharacterized protein FLJ45252	HLA-B35:02	0.0036	9		0.18489
IPLYIDDTL	GGNBP2	Gametogenetin-binding protein 2	HLA-B35:02	0.0193	9		0.18456
EPIPEEQEM	GIGYF2	PERQ amino acid-rich with GYF domain-containing protein 2	HLA-B35:02	0.03	9		0.18453
MPLPTELGDPRL	AHNAK2	Protein AHNAK2	HLA-B35:02	0.4237	12		0.1845
MPIGGDVPAL	UTRN	Utrophin	HLA-B35:02	0.0084	10		0.18426
EVADVEPVL	TBCD	Tubulin-specific chaperone D	HLA-B35:02	0.174	9		0.18423
TAHPGEVTA	TMEM132A	Transmembrane protein 132A	HLA-B35:02	1.1739	9		0.18411
FPEDLRTEL	SYNJ2	Synaptojanin-2	HLA-B35:02	0.0049	9		0.184
FPAYERVLL	TJP2	Tight junction protein ZO-2	HLA-B35:02	0.0057	9		0.18356
EPDGGELVL	NAPSA	Napsin-A	HLA-B35:02	0.017	9		0.18331
HPNEGALVL	PACS1	Phosphofurin acidic cluster sorting protein 1	HLA-B35:02	0.0026	9		0.18324
DAEGDVAAL	TPM4		HLA-B35:02	0.0627	9		0.18294
ATTDVEPAM	ARHGEF38	Rho guanine nucleotide exchange factor 38	HLA-B35:02	1.0886	9		0.18287
HPQTHETAL	TNKS2	Tankyrase-2	HLA-B35:02	0.0231	9		0.18283
KAVDAEPVL	SIKE1	Suppressor of IKBKE 1	HLA-B35:02	0.4562	9		0.18283
LENPVDITL	TMEM132B	Transmembrane protein 132B	HLA-B35:02	0.5696	9		0.18282
HPENAAEIKL	SRP72	Signal recognition particle subunit SRP72	HLA-B35:02	0.2218	10		0.18276
EAVAEEVSL	POR	NADPH--cytochrome P450 reductase	HLA-B35:02	0.1211	9		0.1827
APEEHPVLL	ACTB;ACTG1;POTEF	Actin, cytoplasmic 1;Actin, cytoplasmic 1, N-terminally processed;Actin, cytoplasmic 2;Actin, cytoplasmic 2, N-terminally processed;POTE ankyrin domain family member F	HLA-B35:02	0.0341	9	Da Silva et al., 2017	0.18267
SADVAAVVM	PELO	Protein pelota homolog	HLA-B35:02	0.1179	9		0.18263
FPEALGHVAL	PITPNM1	Membrane-associated phosphatidylinositol transfer protein 1	HLA-B35:02	0.0209	10		0.18222
SPDVNYEEL	PSMC3	26S protease regulatory subunit 6A	HLA-B35:02	0.0396	9		0.18196
LPQEDLEAL	PPP2R1A	Serine/threonine-protein phosphatase 2A 65 kDa regulatory subunit A alpha isoform	HLA-B35:02	0.0083	9		0.18167
SPIAARDLL	PKP3	Plakophilin-3	HLA-B35:02	0.0495	9		0.18163
TASNVEEAF	RAB2A	Ras-related protein Rab-2A	HLA-B35:02	0.5292	9		0.1816
MAEEDEQRL	CKAP2	Cytoskeleton-associated protein 2	HLA-B35:02	0.3576	9		0.18158
EAAADEPAL	ID4	DNA-binding protein inhibitor ID-4	HLA-B35:02	0.088	9		0.18142
EPLAESITDVL	MCL1	Induced myeloid leukemia cell differentiation protein Mcl-1	HLA-B35:02	0.5908	11		0.18115
MPVETFSEF	UBR4	E3 ubiquitin-protein ligase UBR4	HLA-B35:02	0.006	9		0.18103
MAYGVEPAL	BAZ2A	Bromodomain adjacent to zinc finger domain protein 2A	HLA-B35:02	0.0373	9		0.18085
HADDPERVV	DOHH	Deoxyhypusine hydroxylase	HLA-B35:02	0.292	9		0.18077
APEEHPTLL	ACTG2;ACTA1;ACTC1;ACTA2	Actin, gamma-enteric smooth muscle;Actin, alpha skeletal muscle;Actin, alpha cardiac muscle 1;Actin, aortic smooth muscle	HLA-B35:02	0.0497	9		0.18059
ISTEHDPVL	EPC2	Enhancer of polycomb homolog 2	HLA-B35:02	1.2648	9		0.18049
LPDGHELTF	LGALS2	Galectin-2	HLA-B35:02	0.0114	9		0.18037
HPDYAILAA	RRM1	Ribonucleoside-diphosphate reductase large subunit	HLA-B35:02	0.0701	9		0.18036
QAQEYEALL	KRT18	Keratin, type I cytoskeletal 18	HLA-B35:02	0.8549	9		0.18034
VPEPDGHII	ATP10D	Probable phospholipid-transporting ATPase VD	HLA-B35:02	0.0463	9		0.1799
FPAAPIPTL	SYNRG	Synergin gamma	HLA-B35:02	0.0013	9		0.17987
FVGAVDPIM	ASL	Argininosuccinate lyase	HLA-B35:02	1.0444	9		0.17985
YPEQLFGAAGVM	CCT2	T-complex protein 1 subunit beta	HLA-B35:02	0.3561	12		0.17979
LPSVLIDEL	MMS22L	Protein MMS22-like	HLA-B35:02	0.0333	9	Bruggeman et al., 2018	0.17954
VPLELAKEIEM	MAP4	Microtubule-associated protein 4;Microtubule-associated protein	HLA-B35:02	0.9003	11		0.17952
IPDEQIVVM	LGMN	Legumain	HLA-B35:02	0.0017	9		0.17939
QAVRDTATL	VPS13D	Vacuolar protein sorting-associated protein 13D	HLA-B35:02	0.4241	9		0.17932
FPTAEVLL	ZSWIM1	Zinc finger SWIM domain-containing protein 1	HLA-B35:02	0.1087	8		0.17897
TEAGATVTV	MYH1;MYH4	Myosin-1;Myosin-4	HLA-B35:02	1.4624	9		0.17896
LPSEEDPAL	FRMD4B	FERM domain-containing protein 4B	HLA-B35:02	0.0048	9		0.17893
LPAPAIRKEIL	PPAP2B	Lipid phosphate phosphohydrolase 3	HLA-B35:02	0.6187	11		0.1789
EPATEYTL	TNC	Tenascin	HLA-B35:02	0.3228	8		0.17854
FAVHPEPEA	PAK1IP1	p21-activated protein kinase-interacting protein 1	HLA-B35:02	1.7331	9		0.17854
FPSEDILLV	PYROXD1	Pyridine nucleotide-disulfide oxidoreductase domain-containing protein 1	HLA-B35:02	0.0194	9		0.17809
TPYGGQFERM	DDX21	Nucleolar RNA helicase 2	HLA-B35:02	0.0985	10		0.17804
HPHYEDAGL	DPY19L1	Probable C-mannosyltransferase DPY19L1	HLA-B35:02	0.0447	9		0.17798
FPVRDGVVL	ZMIZ2;ZMIZ1	Zinc finger MIZ domain-containing protein 2;Zinc finger MIZ domain-containing protein 1	HLA-B35:02	0.0029	9		0.17794
VPDTDEISF	RASA1	Ras GTPase-activating protein 1	HLA-B35:02	0.048	9		0.17777
SEVDTRTTI	HAO2	Hydroxyacid oxidase 2	HLA-B35:02	1.2313	9		0.17768
SPAPEEPLL	WSB2		HLA-B35:02	0.022	9		0.17745
LPSTEAVAL	TTLL12	Tubulin--tyrosine ligase-like protein 12	HLA-B35:02	0.0058	9		0.17739
QATAEANNL	ATL2;ATL1;ATL3	Atlastin-2;Atlastin-1;Atlastin-3	HLA-B35:02	1.5084	9		0.17706
MPFRGYAVL	FASN	Fatty acid synthase;[Acyl-carrier-protein] S-acetyltransferase;[Acyl-carrier-protein] S-malonyltransferase;3-oxoacyl-[acyl-carrier-protein] synthase;3-oxoacyl-[acyl-carrier-protein] reductase;3-hydroxyacyl-[acyl-carrier-protein] dehydratase;Enoyl-[acyl-carrier-protein] reductase;Oleoyl-[acyl-carrier-protein] hydrolase	HLA-B35:02	0.0083	9		0.17674
FPAEPLEL	SUPT6H	Transcription elongation factor SPT6	HLA-B35:02	0.0212	8		0.17671
FPFGLEPRV	BHMT	Betaine--homocysteine S-methyltransferase 1	HLA-B35:02	0.0578	9		0.17643
NASENDERL	ADNP	Activity-dependent neuroprotector homeobox protein	HLA-B35:02	0.4668	9		0.17637
GAMELEPEL	CRLF3	Cytokine receptor-like factor 3	HLA-B35:02	0.4308	9		0.17634
EPDEDAYDM	NAA20	N-alpha-acetyltransferase 20	HLA-B35:02	0.0938	9		0.17622
EPDAVHVVL	PDDC1	Parkinson disease 7 domain-containing protein 1	HLA-B35:02	0.0053	9		0.17618
DPDGTLEAL	CEP170;CEP170P1	Centrosomal protein of 170 kDa;Cep170-like protein	HLA-B35:02	0.0245	9		0.17602
NIQEGDVVL	TJP1	Tight junction protein ZO-1	HLA-B35:02	0.3823	9		0.17599
VPLETPHVH	GAA	Lysosomal alpha-glucosidase;76 kDa lysosomal alpha-glucosidase;70 kDa lysosomal alpha-glucosidase	HLA-B35:02	0.9138	9		0.17593
AVGPEDVAL	SCRIB	Protein scribble homolog	HLA-B35:02	1.8056	9		0.17592
NANTNTEVL	CHMP4BP1;CHMP4B	Putative charged multivesicular body protein 4B-like protein CHMP4BP1;Charged multivesicular body protein 4b	HLA-B35:02	0.1915	9		0.17582
IPMDPEHVEL	MEA1	Male-enhanced antigen 1	HLA-B35:02	0.031	10		0.17581
HPQIEPANQEL	TPR	Nucleoprotein TPR	HLA-B35:02	0.476	11		0.17577
MPEPVYFHC	KLHDC10	Kelch domain-containing protein 10	HLA-B35:02	0.6476	9		0.17576
LPLEEGQAVL	PTK2B	Protein-tyrosine kinase 2-beta	HLA-B35:02	0.0575	10		0.17575
NPETVAALL	CDC25C	M-phase inducer phosphatase 3	HLA-B35:02	0.0386	9	Bruggeman et al., 2018	0.17513
FPSTETATL	PRRC2C	Protein PRRC2C	HLA-B35:02	0.0021	9		0.1751
MPDVDFNL	AHNAK	Neuroblast differentiation-associated protein AHNAK	HLA-B35:02	0.1372	8		0.17508
FPFVDDNEV	NFE2L2	Nuclear factor erythroid 2-related factor 2	HLA-B35:02	0.0173	9		0.17506
LPDEDLAAF	FAM120C	Constitutive coactivator of PPAR-gamma-like protein 2	HLA-B35:02	0.0079	9		0.17499
SPDEGQEEL	TMEM165	Transmembrane protein 165	HLA-B35:02	0.0184	9		0.17491
LPAEEANGSL	WRAP53	Telomerase Cajal body protein 1	HLA-B35:02	0.0968	10		0.1749
LPSEICDRL	ZER1	Protein zer-1 homolog	HLA-B35:02	0.0902	9		0.17486
DAQADEAVL	COMMD3;COMMD3-BMI1	COMM domain-containing protein 3	HLA-B35:02	0.1807	9		0.17476
MPIPEGLTL	TP53I3	Quinone oxidoreductase PIG3	HLA-B35:02	0.001	9		0.17476
APDAVYTEL	FXYD5	FXYD domain-containing ion transport regulator 5	HLA-B35:02	0.0244	9		0.17455
FAADIISVL	PSMD2	26S proteasome non-ATPase regulatory subunit 2	HLA-B35:02	0.0214	9		0.1744
LPAAEPVL	POLDIP3	Polymerase delta-interacting protein 3	HLA-B35:02	0.2015	8		0.17397
EPSDEEPAL	EAPP	E2F-associated phosphoprotein	HLA-B35:02	0.0317	9		0.17387
HPYHTEPGL	ZSWIM8	Zinc finger SWIM domain-containing protein 8	HLA-B35:02	0.0312	9		0.17384
APQVADAIL	CLTC;CLTCL1	Clathrin heavy chain;Clathrin heavy chain 1;Clathrin heavy chain 2	HLA-B35:02	0.1675	9		0.1737
NPTEPDHAI	CNOT11	CCR4-NOT transcription complex subunit 11	HLA-B35:02	0.031	9		0.17359
HPEDSEYEAEM	USP16	Ubiquitin carboxyl-terminal hydrolase 16	HLA-B35:02	0.5147	11		0.17339
FPDELEEML	PIK3CB	Phosphatidylinositol 4,5-bisphosphate 3-kinase catalytic subunit beta isoform	HLA-B35:02	0.0086	9		0.1733
MPTDVLEVT	EIF4A2	Eukaryotic initiation factor 4A-II;Eukaryotic initiation factor 4A-II, N-terminally processed	HLA-B35:02	0.2609	9		0.1733
FPHDNVEDLI	ASB8	Ankyrin repeat and SOCS box protein 8	HLA-B35:02	0.2321	10		0.17321
LPDGTTVTV	SNX27	Sorting nexin-27	HLA-B35:02	0.0098	9		0.17316
MPHEEGQRM	TMX2		HLA-B35:02	0.0174	9		0.17313
QAVVEEQVL	EPB41L2	Band 4.1-like protein 2	HLA-B35:02	0.7489	9		0.17305
DAQDAEAAM	SRSF8	Serine/arginine-rich splicing factor 8	HLA-B35:02	0.0532	9		0.17295
LPVIEPVSI	NSMCE4A	Non-structural maintenance of chromosomes element 4 homolog A	HLA-B35:02	0.0333	9		0.17256
HADDELAAL	NES	Nestin	HLA-B35:02	0.0422	9		0.17246
HVTQEDFEM	PSMC5	26S protease regulatory subunit 8	HLA-B35:02	0.9188	9		0.17172
LPSPAIDHEQL	MACF1	Microtubule-actin cross-linking factor 1, isoforms 1/2/3/5	HLA-B35:02	0.7531	11		0.17171
HPEELGGPPL	NAB2	NGFI-A-binding protein 2	HLA-B35:02	0.1705	10		0.17151
FPIPLINRL	RNF213	E3 ubiquitin-protein ligase RNF213	HLA-B35:02	0.0045	9		0.1713
TPDEDDHLL	BCL11B	B-cell lymphoma/leukemia 11B	HLA-B35:02	0.0206	9		0.17125
DALRDNETL	TMOD3	Tropomodulin-3	HLA-B35:02	0.2772	9		0.17117
QPEPDATEL	SNAPC2	snRNA-activating protein complex subunit 2	HLA-B35:02	0.0353	9		0.17103
DANPETHAF	ACO2	Aconitate hydratase, mitochondrial	HLA-B35:02	0.0666	9		0.17094
LPDETANLL	CNNM2	Metal transporter CNNM2	HLA-B35:02	0.0045	9		0.17064
FPTPEAVL	SUPT6H	Transcription elongation factor SPT6	HLA-B35:02	0.0527	8		0.17061
FAVLEDHTL	CCDC50	Coiled-coil domain-containing protein 50	HLA-B35:02	0.0931	9		0.1706
LPTAVEPLM	PHF3	PHD finger protein 3	HLA-B35:02	0.0323	9		0.17058
YPDFTNPTM	GANAB	Neutral alpha-glucosidase AB	HLA-B35:02	0.0013	9		0.17003
LPDTTSIFAL	CDK16	Cyclin-dependent kinase 16	HLA-B35:02	0.1123	10		0.1699
SPICDFLEL	CCAR2	Cell cycle and apoptosis regulator protein 2	HLA-B35:02	0.0567	9		0.16989
YPEQEIVNL	IGF2BP2	Insulin-like growth factor 2 mRNA-binding protein 2	HLA-B35:02	0.0039	9		0.16978
FPIPGEPGF	ARPC3	Actin-related protein 2/3 complex subunit 3	HLA-B35:02	0.006	9		0.16973
TPYNGTEAL	HSD17B7	3-keto-steroid reductase	HLA-B35:02	0.0041	9		0.16919
TPATPPNFPDAL	UBALD1;UBALD2;FAM100A	UBA-like domain-containing protein 2;UBA-like domain-containing protein 1	HLA-B35:02	0.6392	12		0.169
NPTQVIETL	VPS8	Vacuolar protein sorting-associated protein 8 homolog	HLA-B35:02	0.0096	9		0.1687
MPDTPDIL	NEB	Nebulin	HLA-B35:02	0.1449	8		0.16866
SPDDLDFRL	DIAPH3	Protein diaphanous homolog 3	HLA-B35:02	0.0393	9	Bruggeman et al., 2018;Wang et al., 2016	0.16864
GPPPFFLCL	TADA2A;TADA2L	Transcriptional adapter 2-alpha	HLA-B35:02	0.5135	9		0.16858
LAEDVRGNL	APOA4	Apolipoprotein A-IV	HLA-B35:02	1.1401	9		0.16856
MPVGPDAIL	BAG6;BAT3	Large proline-rich protein BAG6	HLA-B35:02	0.0052	9		0.16836
DPHVTEPLM	SLC4A2	Anion exchange protein 2	HLA-B35:02	0.1499	9		0.16825
FPVDEVSITYL	ACO1	Cytoplasmic aconitate hydratase	HLA-B35:02	0.1434	11		0.1682
YPEHISNIISL	ZNFX1	NFX1-type zinc finger-containing protein 1	HLA-B35:02	0.1369	11		0.16819
TPQDHEVAL	USP32;USP6	Ubiquitin carboxyl-terminal hydrolase;Ubiquitin carboxyl-terminal hydrolase 32;Ubiquitin carboxyl-terminal hydrolase 6	HLA-B35:02	0.0059	9		0.16817
FPDEFHLQTL	VPS35	Vacuolar protein sorting-associated protein 35	HLA-B35:02	0.0164	10		0.16793
VPDDFETML	EIF3F	Eukaryotic translation initiation factor 3 subunit F	HLA-B35:02	0.0219	9		0.16793
LADHTVHVL	ARHGAP11A;ARHGAP11B	Rho GTPase-activating protein 11A;Rho GTPase-activating protein 11B	HLA-B35:02	0.0995	9	Bruggeman et al., 2018	0.16783
FPSTAEHTL	UBA7	Ubiquitin-like modifier-activating enzyme 7	HLA-B35:02	0.0017	9		0.16769
EAVLIDPVL	ETHE1	Persulfide dioxygenase ETHE1, mitochondrial	HLA-B35:02	0.1278	9		0.16748
NPDTHSWEM	UBAP2L	Ubiquitin-associated protein 2-like	HLA-B35:02	0.0177	9		0.16747
SPDRADPEA	UBA2	SUMO-activating enzyme subunit 2	HLA-B35:02	1.2444	9		0.1674
LPSYEEAL	LAPTM5	Lysosomal-associated transmembrane protein 5	HLA-B35:02	0.495	8		0.16735
HPDTFLNAL	DYNC2H1	Cytoplasmic dynein 2 heavy chain 1	HLA-B35:02	0.0052	9		0.16722
SPAPVEVNL	TRAIP	E3 ubiquitin-protein ligase TRAIP	HLA-B35:02	0.0153	9		0.16705
HPHDLVILM	TTC17	Tetratricopeptide repeat protein 17	HLA-B35:02	0.005	9		0.16672
WPGTAEPLL	SGSH	N-sulphoglucosamine sulphohydrolase	HLA-B35:02	0.1047	9		0.16657
LPSNVEFLL	FBXO46	F-box only protein 46	HLA-B35:02	0.047	9		0.16656
NASEDRLEL	VCPIP1	Deubiquitinating protein VCIP135	HLA-B35:02	0.1751	9		0.16651
DPSHHDIAL	TYK2	Tyrosine-protein kinase;Non-receptor tyrosine-protein kinase TYK2	HLA-B35:02	0.033	9		0.16641
LPIRDGNTL	FAT4	Protocadherin Fat 4	HLA-B35:02	0.0087	9		0.166
WPDPEVFDSL	CYP4B1	Cytochrome P450 4B1	HLA-B35:02	0.0881	10		0.166
VPDHAVLEM	HNRNPUL1	Heterogeneous nuclear ribonucleoprotein U-like protein 1	HLA-B35:02	0.009	9		0.16585
LPNTDVPIL	ELP2	Elongator complex protein 2	HLA-B35:02	0.0138	9		0.16582
DPLGYEIQL	NUP107	Nuclear pore complex protein Nup107	HLA-B35:02	0.0476	9		0.16579
LPDFPALVL	KIAA1524	Protein CIP2A	HLA-B35:02	0.0081	9		0.16579
MPLVEETSL	OSGIN2	Oxidative stress-induced growth inhibitor 2	HLA-B35:02	0.009	9		0.16579
YPTVGDVAL	PIGU	Phosphatidylinositol glycan anchor biosynthesis class U protein	HLA-B35:02	0.0016	9		0.16572
YPDTAGPEA	CORO1C;CORO1B	Coronin-1C;Coronin;Coronin-1B	HLA-B35:02	0.0761	9		0.1654
SPAGDEFSL	TRAPPC3	Trafficking protein particle complex subunit 3	HLA-B35:02	0.0237	9		0.16479
FPVIETSTL	GTPBP4	Nucleolar GTP-binding protein 1	HLA-B35:02	0.0027	9		0.16442
MPAAQEGAVAF	TAPBP	Tapasin	HLA-B35:02	0.1009	11		0.1643
LPAREATQF	GAS6	Growth arrest-specific protein 6	HLA-B35:02	0.1213	9		0.16419
LPTADIAQF	ARFGAP2	ADP-ribosylation factor GTPase-activating protein 2	HLA-B35:02	0.0537	9		0.16419
FPAEGVESAL	GAK	Cyclin-G-associated kinase	HLA-B35:02	0.0076	10		0.16414
YAVATGDAL	LGALS3BP	Galectin-3-binding protein	HLA-B35:02	0.0434	9		0.16405
VPETYAVVL	SCRN3	Secernin-3	HLA-B35:02	0.0203	9		0.16375
NPDPFVPVL	HEATR1	HEAT repeat-containing protein 1;HEAT repeat-containing protein 1, N-terminally processed	HLA-B35:02	0.0034	9		0.16366
IPVSRDWEL	PRRC2A	Protein PRRC2A	HLA-B35:02	0.0203	9		0.16365
MPDFDLHL	AHNAK	Neuroblast differentiation-associated protein AHNAK	HLA-B35:02	0.1516	8		0.16346
AASEDVAAL	FGD6	FYVE, RhoGEF and PH domain-containing protein 6	HLA-B35:02	0.1991	9		0.16339
HPFPDHEL	ABR	Active breakpoint cluster region-related protein	HLA-B35:02	0.043	8		0.16339
LPIDESNTIHL	NPRL2	Nitrogen permease regulator 2-like protein	HLA-B35:02	0.1148	11		0.16338
MAATGDVAL	ITPK1	Inositol-tetrakisphosphate 1-kinase	HLA-B35:02	0.03	9		0.16334
NADTNVEL	SORBS2	Sorbin and SH3 domain-containing protein 2	HLA-B35:02	0.8485	8		0.16332
HAAADGVAL	SLC39A9	Zinc transporter ZIP9	HLA-B35:02	0.0366	9		0.16327
IPTDIISDL	DDX58	Probable ATP-dependent RNA helicase DDX58	HLA-B35:02	0.0223	9		0.16314
LASEDVTAL	KDM5C;KDM5D	Lysine-specific demethylase 5C;Lysine-specific demethylase 5D	HLA-B35:02	0.0731	9		0.16313
FPSAEDVVA	PHF2	Lysine-specific demethylase PHF2	HLA-B35:02	0.1043	9		0.16301
FPHDNVEDL	ASB8	Ankyrin repeat and SOCS box protein 8	HLA-B35:02	0.0056	9		0.16284
VPEDTDPEL	BAHD1	Bromo adjacent homology domain-containing 1 protein	HLA-B35:02	0.0233	9		0.16264
SVNDGEPVL	NEURL1B	E3 ubiquitin-protein ligase NEURL1B	HLA-B35:02	0.4012	9		0.16223
MPDTPDILL	NEB	Nebulin	HLA-B35:02	0.0075	9		0.16218
SPDDLELEL	UPF2	Regulator of nonsense transcripts 2	HLA-B35:02	0.0172	9		0.16211
DADDAVYEL	SRSF5;SRSF4;SRSF6	Serine/arginine-rich splicing factor 5;Serine/arginine-rich splicing factor 6;Serine/arginine-rich splicing factor 4	HLA-B35:02	0.0208	9		0.16186
FANVEEHSF	RBM6	RNA-binding protein 6	HLA-B35:02	0.2265	9		0.16183
NPDPDAETL	ANXA8L1;ANXA8;ANXA8L2	Annexin;Annexin A8-like protein 2;Annexin A8	HLA-B35:02	0.0097	9		0.16165
SPDAEEPQL	SEC16A		HLA-B35:02	0.0446	9		0.16128
TPDAEEPQL	SEC16A	Protein transport protein Sec16A	HLA-B35:02	0.0375	9		0.16128
QPYEPADPAL	BTNL9	Butyrophilin-like protein 9	HLA-B35:02	0.0506	10		0.16123
HPTDVDYRVM	PES1	Pescadillo homolog	HLA-B35:02	0.0534	10		0.16104
HPGGDTVAI	WDR1	WD repeat-containing protein 1	HLA-B35:02	0.0351	9		0.16094
DPVAADLEM	CCDC127	Coiled-coil domain-containing protein 127	HLA-B35:02	0.0316	9		0.16089
FPTTDPVGTLL	OXSR1	Serine/threonine-protein kinase OSR1	HLA-B35:02	0.0903	11		0.16084
TATEVDIKM	SAMD9L	Sterile alpha motif domain-containing protein 9-like	HLA-B35:02	0.2188	9		0.16075
LPLDGELVL	AMN	Protein amnionless	HLA-B35:02	0.0049	9		0.16073
TPLVDFLM	TAF10	Transcription initiation factor TFIID subunit 10	HLA-B35:02	0.5812	8		0.16038
IPTGEGPPL	EPB41	Protein 4.1	HLA-B35:02	0.0314	9		0.16026
SPLLDEPFL	FRMD8		HLA-B35:02	0.1203	9		0.16013
LPTEQEVRF	FOXRED2	FAD-dependent oxidoreductase domain-containing protein 2	HLA-B35:02	0.0749	9		0.15988
EATTDTHTM	MUC16	Mucin-16	HLA-B35:02	0.0991	9		0.15978
IPDDDNERL	GTF2I	General transcription factor II-I	HLA-B35:02	0.0512	9		0.15977
HATFNDPVM	ZNF346	Zinc finger protein 346	HLA-B35:02	0.2153	9		0.15974
SPDLGAVEL	PKN1	Serine/threonine-protein kinase N1	HLA-B35:02	0.0107	9		0.15921
FPEEEAPSTVL	RPN2	Dolichyl-diphosphooligosaccharide--protein glycosyltransferase subunit 2	HLA-B35:02	0.1109	11		0.1592
FPSVLVEEL	FCHSD2	F-BAR and double SH3 domains protein 2	HLA-B35:02	0.0081	9		0.1589
IPYPRPIHL	LYRM1	LYR motif-containing protein 1	HLA-B35:02	0.0191	9		0.15882
MPEEMRVETM	DNAL4	Dynein light chain 4, axonemal	HLA-B35:02	0.0574	10		0.15869
LPADEVDTQL	LSM2	U6 snRNA-associated Sm-like protein LSm2	HLA-B35:02	0.0465	10		0.15868
DAVEIDPSM	METTL13	Methyltransferase-like protein 13	HLA-B35:02	0.0465	9		0.15861
HPNFNGNTL			HLA-B35:02	0.0065	9		0.15852
VPEDDGHAL	AKAP12	A-kinase anchor protein 12	HLA-B35:02	0.007	9		0.15848
IPDPDFTYL	NETO2	Neuropilin and tolloid-like protein 2	HLA-B35:02	0.0079	9		0.15844
IPAEDVPLL	POLR3A	DNA-directed RNA polymerase III subunit RPC1	HLA-B35:02	0.0051	9		0.15807
MPDTPEVLL	NEB	Nebulin	HLA-B35:02	0.0071	9		0.15807
IPDIDAEKL	NDUFAB1	Acyl carrier protein;Acyl carrier protein, mitochondrial	HLA-B35:02	0.0523	9		0.15805
EPIEESNIL	ITPR2	Inositol 1,4,5-trisphosphate receptor type 2	HLA-B35:02	0.0095	9		0.15802
YPDPTFPAM	EOMES	Eomesodermin homolog	HLA-B35:02	0.0006	9		0.15754
DAIPDYEAL	NYNRIN	Protein NYNRIN	HLA-B35:02	0.0427	9		0.15752
HPSHEQIIL	ZFYVE16	Zinc finger FYVE domain-containing protein 16	HLA-B35:02	0.0168	9		0.15739
VPNVIEPSF	GARS	Glycine--tRNA ligase	HLA-B35:02	0.0756	9		0.15727
EPNNDAEAL	BICD2	Protein bicaudal D homolog 2	HLA-B35:02	0.0516	9		0.15718
FPEVYVPTVF	RHOA;RHOC;RHOB	Transforming protein RhoA;Rho-related GTP-binding protein RhoB;Rho-related GTP-binding protein RhoC	HLA-B35:02	0.1581	10		0.15708
MPNTLTEAEKL	SPTBN1	Spectrin beta chain, non-erythrocytic 1	HLA-B35:02	1.013	11		0.15679
LPMVPIVAL	WRN	Werner syndrome ATP-dependent helicase	HLA-B35:02	0.007	9		0.15672
QPDCREPFL	C4B;C4A	Complement C4-B;Complement C4 beta chain;Complement C4-B alpha chain;C4a anaphylatoxin;C4b-B;C4d-B;Complement C4 gamma chain;Complement C4-A;Complement C4 beta chain;Complement C4-A alpha chain;C4a anaphylatoxin;C4b-A;C4d-A;Complement C4 gamma chain	HLA-B35:02	0.3461	9		0.15664
EPIADYAAM	USP48	Ubiquitin carboxyl-terminal hydrolase 48	HLA-B35:02	0.0161	9		0.15657
MIHGIEPML	ATG5	Autophagy protein 5	HLA-B35:02	1.0973	9		0.15649
LPFPEITKM	HMG20B	SWI/SNF-related matrix-associated actin-dependent regulator of chromatin subfamily E member 1-related	HLA-B35:02	0.0062	9		0.15638
IPIISAEHL	MBNL1	Muscleblind-like protein 1	HLA-B35:02	0.0587	9		0.15625
TPTGYIESL	NAP1L1	Nucleosome assembly protein 1-like 1	HLA-B35:02	0.0227	9		0.15622
VPISEEGTPVL	MACF1;KIAA0754	Uncharacterized protein KIAA0754	HLA-B35:02	0.2143	11		0.15603
IPEPIDPLF	RANBP2;RGPD8;RGPD1;RGPD2;RGPD5;RGPD3;RGPD4	E3 SUMO-protein ligase RanBP2;RANBP2-like and GRIP domain-containing protein 1;RANBP2-like and GRIP domain-containing protein 2;RANBP2-like and GRIP domain-containing protein 5/6;RANBP2-like and GRIP domain-containing protein 8;RanBP2-like and GRIP domain-containing protein 4;RanBP2-like and GRIP domain-containing protein 3	HLA-B35:02	0.0404	9	Bruggeman et al., 2018;Da Silva et al., 2017	0.15598
IPIHADPRL	POLR1C	DNA-directed RNA polymerases I and III subunit RPAC1	HLA-B35:02	0.0289	9		0.15561
QPIRENDDQVL	DMXL1	DmX-like protein 1	HLA-B35:02	1.2733	11		0.15532
SATDLVFLI	MATN1	Cartilage matrix protein	HLA-B35:02	1.5414	9		0.1553
MPDLENRVL	IFIT1	Interferon-induced protein with tetratricopeptide repeats 1	HLA-B35:02	0.0069	9		0.15525
YPFPGPIPN			HLA-B35:02	0.3653	9		0.15524
SPYDGNETL	QTRT1	Queuine tRNA-ribosyltransferase	HLA-B35:02	0.0053	9		0.15521
FPDLYEPIL	USP38	Ubiquitin carboxyl-terminal hydrolase 38	HLA-B35:02	0.0098	9		0.15509
TAIGIGDMF	COL6A2	Collagen alpha-2(VI) chain	HLA-B35:02	0.4273	9		0.15492
DPVYEHNTM	ETV1	ETS translocation variant 1	HLA-B35:02	0.0593	9		0.15485
VPDEAYDLL	CDC7	Cell division cycle 7-related protein kinase	HLA-B35:02	0.0239	9		0.15481
LPQFVDPAL	GATA1	Erythroid transcription factor	HLA-B35:02	0.0084	9		0.15478
LPTEAEVKL	FMNL3	Formin-like protein 3	HLA-B35:02	0.0082	9		0.15454
TATKIEITM	CHORDC1	Cysteine and histidine-rich domain-containing protein 1	HLA-B35:02	0.2193	9		0.15445
HPDADAPEV	ZNF518A	Zinc finger protein 518A	HLA-B35:02	0.0366	9		0.15414
APVLPEPIL	HECTD2	Probable E3 ubiquitin-protein ligase HECTD2	HLA-B35:02	0.1114	9		0.15409
DPAYPDITL	UBE4B	Ubiquitin conjugation factor E4 B	HLA-B35:02	0.0184	9		0.15406
LPILEPVL	TNKS1BP1	182 kDa tankyrase-1-binding protein	HLA-B35:02	0.1939	8		0.15394
TAVTHGDHL	USPL1	SUMO-specific isopeptidase USPL1	HLA-B35:02	0.6468	9		0.15348
LPLGEYGL	ISG15	Ubiquitin-like protein ISG15	HLA-B35:02	0.5829	8		0.15312
MPAETIKEL	BICC1	Protein bicaudal C homolog 1	HLA-B35:02	0.0025	9		0.15303
SPQLREAVL	COL6A3	Collagen alpha-3(VI) chain	HLA-B35:02	0.1804	9		0.15303
YPEEFEKLL	TRANK1	TPR and ankyrin repeat-containing protein 1	HLA-B35:02	0.0157	9		0.15302
VPGPAEHPL	EIF4E2	Eukaryotic translation initiation factor 4E type 2	HLA-B35:02	0.0579	9		0.15301
LPDEIYSEL	CLIC5	Chloride intracellular channel protein 5	HLA-B35:02	0.0035	9		0.15295
FPFQDIEL	EXOC6B	Exocyst complex component 6B	HLA-B35:02	0.0185	8		0.15282
FASGLIHRV	KRTCAP2	Keratinocyte-associated protein 2	HLA-B35:02	0.6545	9		0.15242
FPEELTQTFM	EEF1G	Elongation factor 1-gamma	HLA-B35:02	0.042	10		0.15237
NPYSEFIL	RBBP7;RBBP4	Histone-binding protein RBBP7;Histone-binding protein RBBP4	HLA-B35:02	0.2938	8		0.15235
MAHADPTEL	TUBGCP2	Gamma-tubulin complex component 2	HLA-B35:02	0.0904	9		0.15229
LPIEDPYL	SMARCC1;SMARCC2	SWI/SNF complex subunit SMARCC1;SWI/SNF complex subunit SMARCC2	HLA-B35:02	0.1194	8		0.15199
FPDAREQEI	NONO	Non-POU domain-containing octamer-binding protein	HLA-B35:02	0.0239	9		0.15196
IPNENEAQF	AP1B1	AP-1 complex subunit beta-1	HLA-B35:02	0.0215	9		0.15194
MPESEEIAQL	CDK5RAP3	CDK5 regulatory subunit-associated protein 3	HLA-B35:02	0.0489	10		0.15165
EADGTDTHL	TBC1D4	TBC1 domain family member 4	HLA-B35:02	0.2155	9		0.15164
HPDDELVL	POLD2	DNA polymerase delta subunit 2	HLA-B35:02	0.1028	8		0.15142
YPEGAPAVL	METTL2A	Methyltransferase-like protein 2A	HLA-B35:02	0.0022	9		0.1514
YVVDDAAVL	KTI12	Protein KTI12 homolog	HLA-B35:02	0.0966	9		0.15129
LPAATEVQL	FOLR2		HLA-B35:02	0.008	9		0.15128
EAIGDVLAL	ACE	Angiotensin-converting enzyme;Angiotensin-converting enzyme, soluble form	HLA-B35:02	0.0253	9		0.15126
IPDAVTGYYL	TAF10	Transcription initiation factor TFIID subunit 10	HLA-B35:02	0.2004	10		0.15119
FPVAEDISLL	ASCC2	Activating signal cointegrator 1 complex subunit 2	HLA-B35:02	0.0326	10		0.15105
TAQTLVRIL	ILF2	Interleukin enhancer-binding factor 2	HLA-B35:02	1.3291	9		0.15096
HPMPHEVEI	CTIF	CBP80/20-dependent translation initiation factor	HLA-B35:02	0.0063	9		0.15093
DPLPREYVL	UBASH3B	Ubiquitin-associated and SH3 domain-containing protein B	HLA-B35:02	0.0407	9		0.15089
HPSAHDVIL	LAMC2	Laminin subunit gamma-2	HLA-B35:02	0.0066	9		0.15065
QPVGGDPEV	SHC1	SHC-transforming protein 1	HLA-B35:02	0.0836	9		0.15052
MPLPEPEPLP	RBM42	RNA-binding protein 42	HLA-B35:02	1.0894	10		0.15035
SAGPADAEM	SMARCA5	SWI/SNF-related matrix-associated actin-dependent regulator of chromatin subfamily A member 5	HLA-B35:02	0.4071	9		0.15034
FPEGPAVAV	TMPRSS4	Transmembrane protease serine 4	HLA-B35:02	0.0078	9		0.15033
EAARHEHQL	PSPC1	Paraspeckle component 1	HLA-B35:02	0.4451	9		0.15015
SPEPGAVVL	AKAP2	A-kinase anchor protein 2	HLA-B35:02	0.0072	9		0.15013
FPANYVEVL	SORBS3	Vinexin	HLA-B35:02	0.0023	9		0.15007
HPVLLTEAPL	ACTB;ACTR1B;ACTG1;ACTR1A	Actin, cytoplasmic 1;Actin, cytoplasmic 1, N-terminally processed;Beta-centractin;Actin, cytoplasmic 2;Actin, cytoplasmic 2, N-terminally processed;Alpha-centractin	HLA-B35:02	0.3974	10		0.15003
NAIPVDTVL	FBXO18	F-box only protein 18	HLA-B35:02	0.0344	9		0.15
MPVINYDLL	RCAN3	Calcipressin-3	HLA-B35:02	0.0244	9		0.14978
DPTVHDDVL	PRKDC	DNA-dependent protein kinase catalytic subunit	HLA-B35:02	0.1791	9		0.14936
HPDVLPFAL	MDN1	Midasin	HLA-B35:02	0.0069	9		0.14916
MPSILADVF	THOC2	THO complex subunit 2	HLA-B35:02	0.0484	9		0.14909
LPEPEPPGAM	CHMP3	Charged multivesicular body protein 3	HLA-B35:02	0.1187	10		0.14906
TAIDDRCEL	EIF4G3	Eukaryotic translation initiation factor 4 gamma 3	HLA-B35:02	0.2844	9		0.14884
NVVPFEVSL	CDH1	Cadherin-1;E-Cad/CTF1;E-Cad/CTF2;E-Cad/CTF3	HLA-B35:02	0.2812	9		0.14867
SASEVEVQL	CEP85	Centrosomal protein of 85 kDa	HLA-B35:02	0.2154	9		0.14866
HPTDDTTTL	FXYD5	FXYD domain-containing ion transport regulator 5	HLA-B35:02	0.0032	9		0.1485
CAAPTEPVI	CNN3	Calponin-3	HLA-B35:02	1.6746	9		0.14835
TAVDPETNM	LIPA	Lysosomal acid lipase/cholesteryl ester hydrolase	HLA-B35:02	0.2312	9		0.14815
MPVPEILQL	RNLS	Renalase	HLA-B35:02	0.0027	9		0.14798
LPDDPEVL	RNF152	E3 ubiquitin-protein ligase RNF152	HLA-B35:02	0.2152	8		0.14781
NPDDEEQVL	CARD9	Caspase recruitment domain-containing protein 9	HLA-B35:02	0.0195	9		0.14763
FPEALIPVQL	ATP2A2	Sarcoplasmic/endoplasmic reticulum calcium ATPase 2	HLA-B35:02	0.0607	10		0.14739
RPIEDDQEV	FYB	FYN-binding protein	HLA-B35:02	0.1227	9		0.14717
FPHGDLTEF	NISCH	Nischarin	HLA-B35:02	0.0058	9		0.14702
LPEETNEMM	SNRPB2	U2 small nuclear ribonucleoprotein B	HLA-B35:02	0.025	9		0.14686
HPEDNIFKL	SEMA3A	Semaphorin-3A	HLA-B35:02	0.0066	9		0.1466
RPADGDVAA	DTD2	Probable D-tyrosyl-tRNA(Tyr) deacylase 2	HLA-B35:02	0.2542	9		0.1466
YPIYGYDEL	UBAP2	Ubiquitin-associated protein 2	HLA-B35:02	0.0019	9		0.14622
FPLEDTLL	WAPAL	Wings apart-like protein homolog	HLA-B35:02	0.0588	8		0.14593
QPAPELAVF	OFD1	Oral-facial-digital syndrome 1 protein	HLA-B35:02	0.0377	9		0.14574
TADEIQNTL	ADRM1	Proteasomal ubiquitin receptor ADRM1	HLA-B35:02	0.0293	9		0.14573
YPDPELEVQVL	TRAF4	TNF receptor-associated factor 4	HLA-B35:02	0.0941	11		0.14546
IPDLIGESI	IQGAP3	Ras GTPase-activating-like protein IQGAP3	HLA-B35:02	0.0307	9		0.14538
FPEDVAPAL	C2	Complement C2;Complement C2b fragment;Complement C2a fragment	HLA-B35:02	0.0011	9		0.14535
YPEEMIVAL	RPRD2	Regulation of nuclear pre-mRNA domain-containing protein 2	HLA-B35:02	0.001	9		0.14523
LPIVTPAL	KPNA2	Importin subunit alpha-1	HLA-B35:02	0.0955	8	Wang et al., 2016	0.14512
MATDVDDRF	ASPH	Aspartyl/asparaginyl beta-hydroxylase	HLA-B35:02	0.4777	9		0.14496
DADPTEEQM	TERF1	Telomeric repeat-binding factor 1	HLA-B35:02	0.1117	9		0.14491
IPVPVYIPV	ZMYM2	Zinc finger MYM-type protein 2	HLA-B35:02	0.1489	9		0.1448
SPIHPDVVM	SLC1A2	Excitatory amino acid transporter 2;Amino acid transporter	HLA-B35:02	0.0099	9		0.14479
LANADHTTL	VPS11	Vacuolar protein sorting-associated protein 11 homolog	HLA-B35:02	0.1605	9		0.14476
EPTHDTDTL	FBXO11	F-box only protein 11	HLA-B35:02	0.0863	9		0.14469
HAIEESVVL	EIF3H	Eukaryotic translation initiation factor 3 subunit H	HLA-B35:02	0.03	9		0.14468
QAEAEVASL	TPM3;DKFZp686J1372		HLA-B35:02	0.4259	9		0.14459
EPVGLEPAV	SAFB;SAFB2	Scaffold attachment factor B1;Scaffold attachment factor B2	HLA-B35:02	0.08	9		0.14445
TPDHLEPRL	COL6A1	Collagen alpha-1(VI) chain	HLA-B35:02	0.0582	9		0.14408
MPIEIEQKP	RPAP3	RNA polymerase II-associated protein 3	HLA-B35:02	0.9113	9		0.14404
VPNGIEPML	CUL5	Cullin-5	HLA-B35:02	0.0302	9		0.14389
HPKGNEAEL	DHCR24	Delta(24)-sterol reductase	HLA-B35:02	0.0786	9		0.14357
APFFPDCAL	FAM181B	Protein FAM181B	HLA-B35:02	0.0806	9		0.14324
YPPGEYDL	GART	Trifunctional purine biosynthetic protein adenosine-3;Phosphoribosylamine--glycine ligase;Phosphoribosylformylglycinamidine cyclo-ligase;Phosphoribosylglycinamide formyltransferase	HLA-B35:02	0.3774	8		0.14324
LPIDGANDL	MGEA5	Protein O-GlcNAcase	HLA-B35:02	0.0059	9		0.14285
LPIDGANDLF	MGEA5	Protein O-GlcNAcase	HLA-B35:02	0.1372	10		0.14277
HPVIESHPDNAL	NAE1	NEDD8-activating enzyme E1 regulatory subunit	HLA-B35:02	0.2794	12		0.1427
HPQEENEPSL	RIPK1	Receptor-interacting serine/threonine-protein kinase 1	HLA-B35:02	0.1495	10		0.14258
HLSPEEISL	TMEM194B	Transmembrane protein 194B	HLA-B35:02	0.8966	9		0.14255
IPSPIDTVF	PRG4	Proteoglycan 4;Proteoglycan 4 C-terminal part	HLA-B35:02	0.0086	9		0.1425
VPIKEIVEM	SLK	STE20-like serine/threonine-protein kinase	HLA-B35:02	0.0074	9		0.14232
IPAYLAETL	ANXA5	Annexin;Annexin A5	HLA-B35:02	0.0126	9		0.14219
IPLESTDGERL	NFIA;NFIB;NFIX;NFIC	Nuclear factor 1 A-type;Nuclear factor 1;Nuclear factor 1 B-type;Nuclear factor 1 X-type;Nuclear factor 1 C-type	HLA-B35:02	1.0649	11		0.14209
NPDNDTGHTM	MATR3	Matrin-3	HLA-B35:02	0.0381	10		0.14197
FANDDRHVM	STRBP;DKFZp434P151	Spermatid perinuclear RNA-binding protein	HLA-B35:02	0.0194	9		0.14196
FVNDDRHVM	ILF3	Interleukin enhancer-binding factor 3	HLA-B35:02	0.0845	9		0.14196
HPDVLYEAL	RAD54L2	Helicase ARIP4	HLA-B35:02	0.0116	9		0.14182
EPQPGEARL	CPT1A	Carnitine O-palmitoyltransferase 1, liver isoform	HLA-B35:02	0.0943	9		0.14175
HADPTELAL	TUBGCP2	Gamma-tubulin complex component 2	HLA-B35:02	0.0307	9		0.14159
LPALEVLDL	RSU1	Ras suppressor protein 1	HLA-B35:02	0.0562	9		0.1415
QPEDAPVVL	CPVL	Probable serine carboxypeptidase CPVL	HLA-B35:02	0.0096	9		0.14144
LPEDTPPFL	MSH6	DNA mismatch repair protein Msh6	HLA-B35:02	0.0172	9		0.14122
APDVVVPTL	DYNC1H1	Cytoplasmic dynein 1 heavy chain 1	HLA-B35:02	0.0262	9		0.14112
QPTGPEPGL	NRIP1	Nuclear receptor-interacting protein 1	HLA-B35:02	0.2316	9		0.14059
EPVLINPVL	PPRC1	Peroxisome proliferator-activated receptor gamma coactivator-related protein 1	HLA-B35:02	0.0198	9		0.14051
IPEDSIFTM	AMBP	Protein AMBP;Alpha-1-microglobulin;Inter-alpha-trypsin inhibitor light chain;Trypstatin	HLA-B35:02	0.0038	9		0.14048
HPPINEDSL	C2CD3	C2 domain-containing protein 3	HLA-B35:02	0.1451	9		0.14033
EAIDEYQIL	AIDA	Axin interactor, dorsalization-associated protein	HLA-B35:02	0.1408	9		0.13954
VPATDRNAL	EIF3E	Eukaryotic translation initiation factor 3 subunit E	HLA-B35:02	0.0377	9		0.13948
MPDTPEIML	NEB	Nebulin	HLA-B35:02	0.0076	9		0.13943
LPDIYPDLL	C15orf39	Uncharacterized protein C15orf39	HLA-B35:02	0.0384	9		0.13932
HPDPDAEL	RBM25	RNA-binding protein 25	HLA-B35:02	0.1237	8		0.13897
DPTAVGPVL	PPRC1	Peroxisome proliferator-activated receptor gamma coactivator-related protein 1	HLA-B35:02	0.0316	9		0.13883
VATDVGDDL	SPATA2	Spermatogenesis-associated protein 2	HLA-B35:02	0.9775	9		0.1387
LPCRELEQL	FBXL6	F-box/LRR-repeat protein 6	HLA-B35:02	0.8888	9		0.13846
TAGPEPGAL	TGFBR3	Transforming growth factor beta receptor type 3	HLA-B35:02	0.6787	9		0.13836
LPDAAEPCL	ITGAL	Integrin alpha-L	HLA-B35:02	0.068	9		0.13806
LPEGRALPV	FCN3	Ficolin-3	HLA-B35:02	0.3193	9		0.13799
IPLHEDLL	NET1	Neuroepithelial cell-transforming gene 1 protein	HLA-B35:02	0.8241	8		0.13797
MAFHQEHEV	SUN1	SUN domain-containing protein 1	HLA-B35:02	0.3652	9		0.1378
NPDIPNPAL	SMARCA1	Probable global transcription activator SNF2L1	HLA-B35:02	0.0085	9		0.13773
TAELDPHIL	NCBP1	Nuclear cap-binding protein subunit 1	HLA-B35:02	0.3943	9		0.13756
SPEDFVYQF	HLA-DQB1	HLA class II histocompatibility antigen, DQ beta 1 chain	HLA-B35:02	0.0664	9		0.13688
FPSPEYETF	DICER1	Endoribonuclease Dicer	HLA-B35:02	0.0117	9		0.13634
SAMEVVPAL	FBXO21	F-box only protein 21	HLA-B35:02	0.034	9		0.13631
LPVNGEFSL	APP	Amyloid beta A4 protein;N-APP;Soluble APP-alpha;Soluble APP-beta;C99;Beta-amyloid protein 42;Beta-amyloid protein 40;C83;P3(42);P3(40);C80;Gamma-secretase C-terminal fragment 59;Gamma-secretase C-terminal fragment 57;Gamma-secretase C-terminal fragment 50;C31	HLA-B35:02	0.0079	9		0.13628
LPGPEPLEF	SHROOM1	Protein Shroom1	HLA-B35:02	0.0835	9		0.13604
YPVEDYLDL	CHST15	Carbohydrate sulfotransferase 15	HLA-B35:02	0.0051	9		0.13587
HPPDAVDEPQM	DNMT1	DNA (cytosine-5)-methyltransferase 1	HLA-B35:02	0.5598	11		0.13583
TATATNHVL	RECQL	ATP-dependent DNA helicase Q1	HLA-B35:02	0.1598	9		0.1351
WPHEDAAQF	SRPK2	SRSF protein kinase 2;SRSF protein kinase 2 N-terminal;SRSF protein kinase 2 C-terminal	HLA-B35:02	0.0222	9		0.13502
LPQEFGDQDLL	CELF1	CUGBP Elav-like family member 1	HLA-B35:02	0.8031	11		0.13495
IPDSGTEFISL	DENND2D	DENN domain-containing protein 2D	HLA-B35:02	0.2728	11		0.13489
EPEAAEHSF	CHD6	Chromodomain-helicase-DNA-binding protein 6	HLA-B35:02	0.1342	9		0.13486
VIAPPDFVL	ACOX3	Peroxisomal acyl-coenzyme A oxidase 3	HLA-B35:02	0.5757	9		0.13454
HPCDRGEQVTL	ECT2	Protein ECT2	HLA-B35:02	0.6918	11		0.1342
SPLAPEPVL	C6orf89	Bombesin receptor-activated protein C6orf89	HLA-B35:02	0.0354	9		0.13398
MPVDLELVA	B4GALT1	Beta-1,4-galactosyltransferase 1;Lactose synthase A protein;N-acetyllactosamine synthase;Beta-N-acetylglucosaminylglycopeptide beta-1,4-galactosyltransferase;Beta-N-acetylglucosaminyl-glycolipid beta-1,4-galactosyltransferase;Processed beta-1,4-galactosyltransferase 1	HLA-B35:02	0.0897	9		0.13393
VPEDGIGSVI	GATSL3	GATS-like protein 3	HLA-B35:02	0.2485	10		0.13382
TSIEDQDEL	EIF6	Eukaryotic translation initiation factor 6	HLA-B35:02	1.0085	9		0.13373
LPEEMPITVL	STRIP2	Striatin-interacting protein 2	HLA-B35:02	0.0563	10		0.13361
DANDELTPL	DHX9	ATP-dependent RNA helicase A	HLA-B35:02	0.1014	9		0.13356
LPFPGVVL	FYB	FYN-binding protein	HLA-B35:02	0.0446	8		0.13354
LPDPFTPNL	CNOT1	CCR4-NOT transcription complex subunit 1	HLA-B35:02	0.0083	9		0.13344
LPDLDIYLY	SZT2	Protein SZT2	HLA-B35:02	0.2125	9		0.13332
HAVPDELVL	AASDH	Acyl-CoA synthetase family member 4	HLA-B35:02	0.0918	9		0.13285
NANHPDFPM	DYNC1H1	Cytoplasmic dynein 1 heavy chain 1	HLA-B35:02	0.3143	9		0.13285
EPEPGEPLL	EEFSEC	Selenocysteine-specific elongation factor	HLA-B35:02	0.0457	9		0.13275
VPDEHFSTL	C7orf50	Uncharacterized protein C7orf50	HLA-B35:02	0.0036	9		0.13271
LPSDFTPAV			HLA-B35:02	0.0193	9		0.13266
AAVGHVLVV	SSSCA1		HLA-B35:02	0.9612	9		0.13262
DPVGDIVSF	FAF2	FAS-associated factor 2	HLA-B35:02	0.0413	9		0.13256
MPYPDETNL	BMPR2	Bone morphogenetic protein receptor type-2	HLA-B35:02	0.0031	9		0.13247
EPLPAEPVL	PPRC1	Peroxisome proliferator-activated receptor gamma coactivator-related protein 1	HLA-B35:02	0.0118	9		0.13235
DPYEGQEVM	PAFAH2	Platelet-activating factor acetylhydrolase 2, cytoplasmic	HLA-B35:02	0.0082	9		0.13213
MGTDPEPAM	NIPBL	Nipped-B-like protein	HLA-B35:02	0.5812	9		0.13187
TASEDHTL	STRN;STRN3	Striatin;Striatin-3	HLA-B35:02	1.6418	8		0.13186
YPFDGPGNTL	MMP7	Matrilysin	HLA-B35:02	0.0034	10		0.13164
EPVQGEEAM	STAG1;DKFZp781D1416	Cohesin subunit SA-1	HLA-B35:02	0.0344	9		0.13145
HPEPTDHVL	TEP1	Telomerase protein component 1	HLA-B35:02	0.0054	9		0.13144
HPELNEGLM	ELF3	ETS-related transcription factor Elf-3	HLA-B35:02	0.1514	9		0.13141
LPDARDPAF	LAMP1	Lysosome-associated membrane glycoprotein 1	HLA-B35:02	0.022	9		0.13135
FPDEGFSGL	PADI2	Protein-arginine deiminase type-2	HLA-B35:02	0.0036	9		0.13133
HPDAQAEVRL	BCAM	Basal cell adhesion molecule	HLA-B35:02	0.1078	10		0.1312
MPYTDAVV	CYP2C8;CYP2C18;CYP2C9;CYP2C19	Cytochrome P450 2C18;Cytochrome P450 2C8;Cytochrome P450 2C9;Cytochrome P450 2C19	HLA-B35:02	0.3299	8		0.13113
APDLYIPTM	YIF1A	Protein YIF1A	HLA-B35:02	0.0248	9		0.13104
FPHSEETTTM	MUC16	Mucin-16	HLA-B35:02	0.0147	10		0.13101
DADPILISL	CORO1B	Coronin-1B	HLA-B35:02	0.0264	9		0.13086
NADPILISL	CORO1C	Coronin-1C;Coronin	HLA-B35:02	0.036	9		0.13086
MPDFDLNL	AHNAK	Neuroblast differentiation-associated protein AHNAK	HLA-B35:02	0.1639	8		0.1307
LPDANRDTL	ARHGAP18	Rho GTPase-activating protein 18	HLA-B35:02	0.0125	9		0.13039
MPDVELNL	AHNAK	Neuroblast differentiation-associated protein AHNAK	HLA-B35:02	0.1466	8		0.13034
FPIEAGDMF	PDLIM5	PDZ and LIM domain protein 5	HLA-B35:02	0.0052	9		0.13007
SPSDADREL	MICAL3	Protein-methionine sulfoxide oxidase MICAL3	HLA-B35:02	0.0404	9		0.12978
NPYHNEPGF	UBE2Z	Ubiquitin-conjugating enzyme E2 Z	HLA-B35:02	0.0599	9		0.12974
TAAPVVPEL	ROCK2	Rho-associated protein kinase 2	HLA-B35:02	0.0493	9		0.12974
HPSDLTIAL	DAGLA	Sn1-specific diacylglycerol lipase alpha	HLA-B35:02	0.0019	9		0.12954
SPHGGALVM	INTS1	Integrator complex subunit 1	HLA-B35:02	0.0177	9		0.12919
DAVPDAPIL	NCR3LG1	Natural cytotoxicity triggering receptor 3 ligand 1	HLA-B35:02	0.0797	9		0.12907
GPDNVHVAL	SMC2	Structural maintenance of chromosomes protein 2	HLA-B35:02	0.0258	9		0.12904
AEIEAQAAL	CCDC96	Coiled-coil domain-containing protein 96	HLA-B35:02	0.6667	9		0.12889
LADGVPVAL	AP5B1	AP-5 complex subunit beta-1	HLA-B35:02	0.0395	9		0.12876
ESVPVIGQL	COL12A1	Collagen alpha-1(XII) chain	HLA-B35:02	1.0017	9		0.12864
MPDTEESRL	TIAM1	T-lymphoma invasion and metastasis-inducing protein 1	HLA-B35:02	0.0295	9		0.12863
EPEHNVAYL	CHFR	E3 ubiquitin-protein ligase CHFR	HLA-B35:02	0.0865	9		0.12847
VAVAHGDLL	KCNJ10	ATP-sensitive inward rectifier potassium channel 10	HLA-B35:02	0.5202	9		0.12841
TPSVHEPVL	HERC2	E3 ubiquitin-protein ligase HERC2	HLA-B35:02	0.0302	9		0.12835
TPEEGAQAL	TTLL12	Tubulin--tyrosine ligase-like protein 12	HLA-B35:02	0.0081	9		0.12818
MPEGLTPLATL	RHPN2;RHPN2P1	Rhophilin-2;Putative rhophilin-2-like protein RHPN2P1	HLA-B35:02	0.2608	11		0.12806
QAEISAHEL	UTRN	Utrophin	HLA-B35:02	0.4664	9		0.12795
EPEQFVVVM	DIAPH3	Protein diaphanous homolog 3	HLA-B35:02	0.0242	9	Bruggeman et al., 2018;Wang et al., 2016	0.12776
MPVDERDLQA	RRAD	GTP-binding protein RAD	HLA-B35:02	1.172	10		0.12746
MPAFEVSL	APOB	Apolipoprotein B-100;Apolipoprotein B-48	HLA-B35:02	0.0681	8		0.12724
TVVGTDYVF	PLXNB2	Plexin-B2	HLA-B35:02	0.698	9		0.12718
HPNIDTASL	CDC37	Hsp90 co-chaperone Cdc37;Hsp90 co-chaperone Cdc37, N-terminally processed	HLA-B35:02	0.0071	9		0.12632
SPVEVAQDVL	DHRS7B	Dehydrogenase/reductase SDR family member 7B	HLA-B35:02	0.1125	10		0.12625
FPLMTIEEF	BTBD2;BTBD1	BTB/POZ domain-containing protein 1;BTB/POZ domain-containing protein 2	HLA-B35:02	0.0259	9		0.12578
FPNNVATVL	SLC18B1	MFS-type transporter SLC18B1	HLA-B35:02	0.0015	9		0.1253
MPETSHIVAL	EVI2A	Protein EVI2A	HLA-B35:02	0.0467	10		0.12494
SADLRADAM	MSN	Moesin	HLA-B35:02	0.3425	9		0.12485
YPDPAIAQF	HSPA4	Heat shock 70 kDa protein 4	HLA-B35:02	0.0024	9		0.12476
FPLEQEADL	ANKLE2	Ankyrin repeat and LEM domain-containing protein 2	HLA-B35:02	0.0093	9		0.12458
QAEGRNPTL	NCDN	Neurochondrin	HLA-B35:02	0.5694	9		0.12423
LPSNDEPIL	PIK3C2A	Phosphatidylinositol 4-phosphate 3-kinase C2 domain-containing subunit alpha	HLA-B35:02	0.037	9		0.12404
LPDTILEKL	NOL7	Nucleolar protein 7	HLA-B35:02	0.0342	9		0.12392
YPEPRVLTL	VPS13B	Vacuolar protein sorting-associated protein 13B	HLA-B35:02	0.0026	9		0.12392
APYEADAQL	EXO1	Exonuclease 1	HLA-B35:02	0.0248	9	Bruggeman et al., 2018	0.12387
NADAIVVKL	SND1	Staphylococcal nuclease domain-containing protein 1	HLA-B35:02	0.0949	9		0.12387
QPDPGAVAA	DAK	Bifunctional ATP-dependent dihydroxyacetone kinase/FAD-AMP lyase (cyclizing);ATP-dependent dihydroxyacetone kinase;FAD-AMP lyase (cyclizing)	HLA-B35:02	0.1087	9		0.12357
YPTGDTNVL	MUC16	Mucin-16	HLA-B35:02	0.0021	9		0.1235
NAAVDGISL	NUP155	Nuclear pore complex protein Nup155	HLA-B35:02	0.0981	9		0.1234
TSAPDDDVAM	FRMD8;FRMD8P1	FERM domain-containing protein 8;Putative FERM domain-containing protein FRMD8P1	HLA-B35:02	1.9805	10		0.12332
TAVEEPDSL	BAG6;BAT3	Large proline-rich protein BAG6	HLA-B35:02	0.2111	9		0.12327
MPESEEIAQLL	CDK5RAP3	CDK5 regulatory subunit-associated protein 3	HLA-B35:02	0.2966	11		0.12322
HPTDVDYRV	PES1	Pescadillo homolog	HLA-B35:02	0.0503	9		0.12312
LPVAPGPEL	ABHD15	Abhydrolase domain-containing protein 15	HLA-B35:02	0.0056	9		0.12301
APDDDVAM	FRMD8;FRMD8P1	FERM domain-containing protein 8;Putative FERM domain-containing protein FRMD8P1	HLA-B35:02	0.2107	8		0.123
LPPIQYEPVL	SEC23A	Protein transport protein Sec23A	HLA-B35:02	0.3913	10		0.12293
EPDGGLVVL	GCKR	Glucokinase regulatory protein	HLA-B35:02	0.0068	9		0.12282
FPEVYVPTV	RHOA;RHOC;RHOB	Transforming protein RhoA;Rho-related GTP-binding protein RhoB;Rho-related GTP-binding protein RhoC	HLA-B35:02	0.0411	9		0.12262
YPDPVIQEL	TANGO6	Transport and Golgi organization protein 6 homolog	HLA-B35:02	0.0008	9		0.12226
FPHSEITTL	MUC16	Mucin-16	HLA-B35:02	0.0018	9		0.12225
LPHSEITTL	MUC16	Mucin-16	HLA-B35:02	0.007	9		0.12225
LPDDVAISA	NCF4	Neutrophil cytosol factor 4	HLA-B35:02	0.0701	9		0.12221
HASPEHVVM			HLA-B35:02	0.0449	9		0.12205
EVDSRDWAL	SETD7	Histone-lysine N-methyltransferase SETD7	HLA-B35:02	0.334	9		0.12181
VPEVYTPVL	PRKDC	DNA-dependent protein kinase catalytic subunit	HLA-B35:02	0.0314	9		0.12174
TPVDDRISL	DDX20	Probable ATP-dependent RNA helicase DDX20	HLA-B35:02	0.0082	9		0.1217
SAIPHPLIM	COPS2	COP9 signalosome complex subunit 2	HLA-B35:02	0.1071	9		0.1215
LPFDDDNVM	MELK	Maternal embryonic leucine zipper kinase	HLA-B35:02	0.0038	9		0.12146
LPIGTPDYM	CIT	Citron Rho-interacting kinase	HLA-B35:02	0.0079	9		0.12122
ENAGVDPTL	GPKOW	G patch domain and KOW motifs-containing protein	HLA-B35:02	1.5474	9		0.1212
SPDATRESM	SNX17	Sorting nexin-17	HLA-B35:02	0.0374	9		0.12093
EPTTTPDAM	RBFOX2	RNA binding protein fox-1 homolog 2	HLA-B35:02	0.0877	9		0.1206
MILELDPTF	TNS4	Tensin-4	HLA-B35:02	0.5466	9		0.12055
FPEDHDPTI	RIT1	GTP-binding protein Rit1	HLA-B35:02	0.0098	9		0.12052
IPVHDGYVL	ACTL6B;ACTL6A	Actin-like protein 6B;Actin-like protein 6A	HLA-B35:02	0.0064	9		0.12045
QVSDDTVEM	TPR	Nucleoprotein TPR	HLA-B35:02	0.3708	9		0.1201
HPVGEASIL	MTIF2	Translation initiation factor IF-2, mitochondrial	HLA-B35:02	0.0097	9		0.11997
HAEQERVAL	KIZ	Centrosomal protein kizuna	HLA-B35:02	0.1458	9		0.11986
RPVELSDRETL	CCT4	T-complex protein 1 subunit delta	HLA-B35:02	1.4731	11		0.11975
HPDTVDDLF	TNPO3	Transportin-3	HLA-B35:02	0.0785	9		0.11958
SPEESPFGDLL	GID8	Glucose-induced degradation protein 8 homolog	HLA-B35:02	1.1295	11		0.11949
TVHDQEHIM	MCFD2	Multiple coagulation factor deficiency protein 2	HLA-B35:02	0.5481	9		0.11933
LPVPDPILL	PSME3	Proteasome activator complex subunit 3	HLA-B35:02	0.0041	9		0.11924
EPFSEEATL	SND1	Staphylococcal nuclease domain-containing protein 1	HLA-B35:02	0.0172	9		0.11898
HPDTHHPGL	GATA3	Trans-acting T-cell-specific transcription factor GATA-3	HLA-B35:02	0.0284	9		0.11865
FPTTDGNHL	INPP4A	Type I inositol 3,4-bisphosphate 4-phosphatase	HLA-B35:02	0.0118	9		0.1186
NVGAPDVTL	AHNAK	Neuroblast differentiation-associated protein AHNAK	HLA-B35:02	0.756	9		0.11797
HIEESEHVL	VPS39	Vam6/Vps39-like protein	HLA-B35:02	0.3644	9		0.11782
IPDNVDAAL	VTN	Vitronectin;Vitronectin V65 subunit;Vitronectin V10 subunit;Somatomedin-B	HLA-B35:02	0.0054	9		0.11765
MGHLDVVAL	ANKRD44	Serine/threonine-protein phosphatase 6 regulatory ankyrin repeat subunit B	HLA-B35:02	0.7771	9		0.1175
YPLPEDPAI	DYSF	Dysferlin	HLA-B35:02	0.0056	9		0.11712
DAENHEAQL	NUDC	Nuclear migration protein nudC	HLA-B35:02	0.3875	9		0.11708
LAHGADPTL	TNKS2	Tankyrase-2	HLA-B35:02	0.1928	9		0.1169
LAHGADPTM	TNKS	Tankyrase-1	HLA-B35:02	0.1658	9		0.1169
SPSTSIFFI	DNAH17	Dynein heavy chain 17, axonemal	HLA-B35:02	0.3594	9	Da Silva et al., 2017	0.11674
VGAMEIVAM	SBNO1;SBNO2	Protein strawberry notch homolog 1;Protein strawberry notch homolog 2	HLA-B35:02	1.3561	9		0.11648
HPNDDDVHF	XRN1	5-3 exoribonuclease 1	HLA-B35:02	0.0344	9		0.11644
LPAEEDSVL	MAP4	Microtubule-associated protein 4;Microtubule-associated protein	HLA-B35:02	0.0049	9		0.11633
SAEVTPPVL	ELMSAN1	ELM2 and SANT domain-containing protein 1	HLA-B35:02	0.3426	9		0.11616
SAADREASL	TBC1D14	TBC1 domain family member 14	HLA-B35:02	0.2889	9		0.11603
EPAGTDPGL	FERMT3	Fermitin family homolog 3	HLA-B35:02	0.0815	9		0.11592
YPFPDRDL	MECOM	MDS1 and EVI1 complex locus protein EVI1	HLA-B35:02	0.1289	8		0.11588
MPDPTPFLL	CCDC92	Coiled-coil domain-containing protein 92	HLA-B35:02	0.0023	9		0.11572
HPDEDISL	ZNF207	BUB3-interacting and GLEBS motif-containing protein ZNF207	HLA-B35:02	0.0883	8		0.11521
SPIPTEDQF	LPIN2	Phosphatidate phosphatase LPIN2	HLA-B35:02	0.0559	9		0.11513
TPINEGQTVL	TMF1	TATA element modulatory factor	HLA-B35:02	0.0574	10		0.11503
SPFGTDPLL	TFEC	Transcription factor EC	HLA-B35:02	0.0212	9		0.11494
DAALERVQM	TNIP2	TNFAIP3-interacting protein 2	HLA-B35:02	0.2409	9		0.11492
LPSARTDEQAL	LAMTOR1	Ragulator complex protein LAMTOR1	HLA-B35:02	1.2707	11		0.11482
MPFQDGQEFEL	CLC	Galectin-10	HLA-B35:02	0.101	11		0.11479
SPHGETTSV	SRGAP2	SLIT-ROBO Rho GTPase-activating protein 2	HLA-B35:02	0.096	9		0.11474
AASELEPLL	PQLC2	Lysosomal amino acid transporter 1 homolog	HLA-B35:02	0.8749	9		0.11466
QPEPGGVPL	EIF4E3	Eukaryotic translation initiation factor 4E type 3	HLA-B35:02	0.0233	9		0.1146
NPLEETSAL	MUC20	Mucin-20	HLA-B35:02	0.0048	9		0.11443
HPQPGAVEL	CAD	CAD protein;Glutamine-dependent carbamoyl-phosphate synthase;Aspartate carbamoyltransferase;Dihydroorotase	HLA-B35:02	0.0043	9		0.11441
DPQEAESEM	RABL6	Rab-like protein 6	HLA-B35:02	0.12	9		0.11438
LPDPNLITF	ABR	Active breakpoint cluster region-related protein	HLA-B35:02	0.0043	9		0.1143
LPSREHESL	DNA2	DNA replication ATP-dependent helicase/nuclease DNA2;DNA replication nuclease DNA2;DNA replication ATP-dependent helicase DNA2	HLA-B35:02	0.1041	9		0.11417
LPTEDISLL	SLC1A2	Excitatory amino acid transporter 2;Amino acid transporter	HLA-B35:02	0.0086	9		0.11413
MPVFPDFKM	PAF1	RNA polymerase II-associated factor 1 homolog	HLA-B35:02	0.0179	9		0.11408
HPVEAAQTL	PRDM10	PR domain zinc finger protein 10	HLA-B35:02	0.0022	9		0.114
MPQTHHHAL	HEATR1	HEAT repeat-containing protein 1;HEAT repeat-containing protein 1, N-terminally processed	HLA-B35:02	0.0156	9		0.11357
QPVHPDVTM	PIAS3	E3 SUMO-protein ligase PIAS3	HLA-B35:02	0.0218	9		0.11355
EAEEGRNSL	LAD1	Ladinin-1	HLA-B35:02	0.1577	9		0.11285
NIAGPDAAL	AHNAK	Neuroblast differentiation-associated protein AHNAK	HLA-B35:02	0.3792	9		0.11276
HPLYVDVVL	IL17RA	Interleukin-17 receptor A	HLA-B35:02	0.0067	9		0.11272
TASEPDTTL	HECTD4	Probable E3 ubiquitin-protein ligase HECTD4	HLA-B35:02	0.0984	9		0.11257
GPDPAELLL	POM121C;POM121	Nuclear envelope pore membrane protein POM 121C;Nuclear envelope pore membrane protein POM 121	HLA-B35:02	0.0644	9		0.11255
FVHQGETEL	GRWD1	Glutamate-rich WD repeat-containing protein 1	HLA-B35:02	0.226	9		0.11245
MPHDLITQL	TUBGCP2	Gamma-tubulin complex component 2	HLA-B35:02	0.0036	9		0.11238
LPDGDHDL	ALDOA;ALDOC	Fructose-bisphosphate aldolase;Fructose-bisphosphate aldolase A;Fructose-bisphosphate aldolase C	HLA-B35:02	0.7017	8		0.11207
NPDNSFEIL	CANX	Calnexin	HLA-B35:02	0.0232	9		0.11205
MPSTRDYEI	PTK2	Focal adhesion kinase 1	HLA-B35:02	0.0437	9		0.11202
FPNPAAHAL	MED23	Mediator of RNA polymerase II transcription subunit 23	HLA-B35:02	0.0005	9		0.11183
SPAGEAHSL	MUC16	Mucin-16	HLA-B35:02	0.0138	9		0.11177
HPTVTGESL	FAM46B	Protein FAM46B	HLA-B35:02	0.0232	9		0.11168
QPVVEDVSL	VWA5A	von Willebrand factor A domain-containing protein 5A	HLA-B35:02	0.0326	9		0.1115
FPFYYEIKM	REEP4	Receptor expression-enhancing protein;Receptor expression-enhancing protein 4	HLA-B35:02	0.0112	9		0.11125
HPDVTEAML	PABPC1;PABPC1L;PABPC3	Polyadenylate-binding protein 1;Polyadenylate-binding protein;Polyadenylate-binding protein 1-like;Polyadenylate-binding protein 3	HLA-B35:02	0.015	9	Bruggeman et al., 2018;Da Silva et al., 2017	0.11121
VPNEEDPSL	TGFBR1	Receptor protein serine/threonine kinase;TGF-beta receptor type-1	HLA-B35:02	0.0095	9		0.11101
LPISEFALL	EVPL	Envoplakin	HLA-B35:02	0.0239	9		0.11097
RPDPAGHLTL	MAN2C1	Alpha-mannosidase 2C1	HLA-B35:02	0.1037	10		0.11091
APVETEPKL	ATG2B	Autophagy-related protein 2 homolog B	HLA-B35:02	0.0486	9		0.11084
APLAGDPRL	SGPP1	Sphingosine-1-phosphate phosphatase 1	HLA-B35:02	0.1267	9		0.11053
FPDYVLDEV	KLHL15	Kelch-like protein 15	HLA-B35:02	0.0362	9		0.11046
LPAEEGKTLLEL	ATP2A2	Sarcoplasmic/endoplasmic reticulum calcium ATPase 2	HLA-B35:02	0.4147	12		0.11045
SAFPEVRSL	THADA	Thyroid adenoma-associated protein	HLA-B35:02	0.154	9		0.11022
MPFHWKQEEL	STAT6	Signal transducer and activator of transcription 6	HLA-B35:02	0.2797	10		0.11021
SAYGGPVGA	KRT7	Keratin, type II cytoskeletal 7	HLA-B35:02	1.5679	9		0.1101
HAFQLEHIM	DYNC1H1	Cytoplasmic dynein 1 heavy chain 1	HLA-B35:02	0.1051	9		0.10995
EAIVTSEEL	SPTAN1	Spectrin alpha chain, non-erythrocytic 1	HLA-B35:02	0.1337	9		0.10981
VAAPADPEM	BAK1	Bcl-2 homologous antagonist/killer	HLA-B35:02	0.1313	9		0.10966
NPSDLLEIL	LILRB5	Leukocyte immunoglobulin-like receptor subfamily B member 5	HLA-B35:02	0.0227	9		0.10964
IPNENELQF	AP2B1	AP-2 complex subunit beta	HLA-B35:02	0.0239	9		0.10956
SPNANEPPL	LAP3	Cytosol aminopeptidase	HLA-B35:02	0.0555	9		0.10938
SPSVLVVEL	TDRD7	Tudor domain-containing protein 7	HLA-B35:02	0.0383	9		0.10924
FPENYVPTVF	RND3;ARHE	Rho-related GTP-binding protein RhoE	HLA-B35:02	0.0915	10		0.10903
FPQIEGSAL	ATG4C	Cysteine protease ATG4C	HLA-B35:02	0.0042	9		0.10896
SAEELDAQL	ALYREF	THO complex subunit 4	HLA-B35:02	0.4314	9		0.10867
FPQAEDLYL	CERS6	Ceramide synthase 6	HLA-B35:02	0.0083	9		0.10863
QVSRVDPEM	CDK5RAP1	CDK5 regulatory subunit-associated protein 1	HLA-B35:02	1.8567	9		0.1086
HPTIISESF	CCT4	T-complex protein 1 subunit delta	HLA-B35:02	0.0656	9		0.10823
MPPHIGDQPL	BLVRB	Flavin reductase (NADPH)	HLA-B35:02	0.2392	10		0.10819
VPILSEEEL	CAPRIN1	Caprin-1	HLA-B35:02	0.0318	9		0.10819
QAHGGETSM	AMBRA1	Activating molecule in BECN1-regulated autophagy protein 1	HLA-B35:02	0.3096	9		0.10795
MPLTADPTL	LIPE	Hormone-sensitive lipase	HLA-B35:02	0.0042	9		0.10776
LPYDVTPEQAL	IQGAP1;IQGAP3	Ras GTPase-activating-like protein IQGAP1;Ras GTPase-activating-like protein IQGAP3	HLA-B35:02	0.118	11		0.10767
DPTTDDPAL	PAQR7	Membrane progestin receptor alpha	HLA-B35:02	0.0988	9		0.10764
NSTEPDPLL	PPP6R3	Serine/threonine-protein phosphatase 6 regulatory subunit 3	HLA-B35:02	1.7187	9		0.10759
SVDETTQAM	U2AF2	Splicing factor U2AF 65 kDa subunit	HLA-B35:02	0.123	9		0.10739
DITQIVDVF	CLTC	Clathrin heavy chain;Clathrin heavy chain 1	HLA-B35:02	1.443	9		0.10734
LPDSVEIGL	NCDN	Neurochondrin	HLA-B35:02	0.0192	9		0.1073
MPSDVLEVT	EIF4A1	Eukaryotic initiation factor 4A-I	HLA-B35:02	0.2296	9		0.107
SAQVGDPEM	ALMS1	Alstrom syndrome protein 1	HLA-B35:02	0.3937	9		0.10696
NATGPDLEF	WDR47	WD repeat-containing protein 47	HLA-B35:02	0.3476	9		0.10592
TQADPVDVL	COL5A3	Collagen alpha-3(V) chain	HLA-B35:02	0.897	9		0.10592
SPEEFNPKL	TBC1D9	TBC1 domain family member 9	HLA-B35:02	0.0419	9		0.1058
HPNYLGDLIM	LBR;TM7SF2	Lamin-B receptor;Delta(14)-sterol reductase	HLA-B35:02	0.1075	10		0.10566
VPEGQEVTL	CDHR5	Cadherin-related family member 5	HLA-B35:02	0.0161	9		0.10557
SPAEGSERL	MAP1S	Microtubule-associated protein 1S;MAP1S heavy chain;MAP1S light chain	HLA-B35:02	0.032	9		0.10546
SPNYDHVVL	EIF3I	Eukaryotic translation initiation factor 3 subunit I	HLA-B35:02	0.0192	9		0.10519
TPYEYPYTL	QKI	Protein quaking	HLA-B35:02	0.0029	9		0.10507
NPQFLDPVL	TNPO3	Transportin-3	HLA-B35:02	0.0224	9		0.10504
FAIPLIEKL	DDX21	Nucleolar RNA helicase 2	HLA-B35:02	0.1588	9		0.10502
LPELAGPAL	SNRK	SNF-related serine/threonine-protein kinase	HLA-B35:02	0.0073	9		0.10484
LPDGYEFKF	LGALS1	Galectin-1	HLA-B35:02	0.0933	9		0.10475
LPISIPEPVL	POU2AF1	POU domain class 2-associating factor 1	HLA-B35:02	0.1058	10		0.10454
HAEPLAAVL	PLEKHM3	Pleckstrin homology domain-containing family M member 3	HLA-B35:02	0.0614	9	Bruggeman et al., 2018	0.10451
FPVESEAVM	SRA1	Steroid receptor RNA activator 1	HLA-B35:02	0.0012	9		0.10444
DPENTDYTM	CCDC94	Coiled-coil domain-containing protein 94	HLA-B35:02	0.091	9		0.10423
HPHPEDIKF	CARD8	Caspase recruitment domain-containing protein 8	HLA-B35:02	0.0437	9		0.10404
LPQPDVFPL	AATF	Protein AATF	HLA-B35:02	0.0161	9		0.10402
TPAGDIMEL	HCFC1R1	Host cell factor C1 regulator 1	HLA-B35:02	0.0057	9		0.10398
APDIDVQL	GLTSCR2	Glioma tumor suppressor candidate region gene 2 protein	HLA-B35:02	0.3938	8		0.10382
EAHLELNAF	ATP9B;ATP9A	Probable phospholipid-transporting ATPase IIB;Phospholipid-transporting ATPase;Probable phospholipid-transporting ATPase IIA	HLA-B35:02	0.4585	9		0.1038
TADGQVIVM	TULP4	Tubby-related protein 4	HLA-B35:02	0.05	9		0.1038
HVIADQEVM	PNN	Pinin	HLA-B35:02	0.3754	9		0.10375
SPEDLEAQL	DNAJC5	DnaJ homolog subfamily C member 5	HLA-B35:02	0.0432	9		0.10361
LPDRDLAL	SIRT6	NAD-dependent protein deacetylase sirtuin-6	HLA-B35:02	0.2813	8		0.10346
MPYLEHESF	CDC7	Cell division cycle 7-related protein kinase	HLA-B35:02	0.0311	9		0.10343
NPSTDVVTL	ZBTB41	Zinc finger and BTB domain-containing protein 41	HLA-B35:02	0.0077	9		0.10334
GPPDRDPTL	SCAF1	Splicing factor, arginine/serine-rich 19	HLA-B35:02	0.2732	9		0.10332
FPDQNFEVM	BAZ2A	Bromodomain adjacent to zinc finger domain protein 2A	HLA-B35:02	0.0016	9		0.10316
TAQTEVAQM	REST	RE1-silencing transcription factor	HLA-B35:02	0.5164	9		0.10316
YPDLGPEL	ZNF710	Zinc finger protein 710	HLA-B35:02	0.037	8		0.1031
SPDHPVVL	BANP	Protein BANP	HLA-B35:02	0.1738	8		0.10265
IPEGLPAVI	ATP2A3;ATP2A1;ATP2A2	Sarcoplasmic/endoplasmic reticulum calcium ATPase 3;Sarcoplasmic/endoplasmic reticulum calcium ATPase 2;Sarcoplasmic/endoplasmic reticulum calcium ATPase 1	HLA-B35:02	0.0379	9		0.1025
MPDGPVAL	DYNC1H1	Cytoplasmic dynein 1 heavy chain 1	HLA-B35:02	0.0173	8		0.10238
LPDGQVITI	ACTB;ACTBL2;ACTG2;ACTA1;ACTC1;ACTA2;ACTG1;POTEE;POTEF;POTEJ;POTEI;POTEKP	Actin, cytoplasmic 1;Actin, cytoplasmic 1, N-terminally processed;Beta-actin-like protein 2;Actin, gamma-enteric smooth muscle;Actin, alpha skeletal muscle;Actin, alpha cardiac muscle 1;Actin, aortic smooth muscle;Actin, cytoplasmic 2;Actin, cytoplasmic 2, N-terminally processed;POTE ankyrin domain family member E;POTE ankyrin domain family member F;POTE ankyrin domain family member J;POTE ankyri…	HLA-B35:02	0.0088	9	CTDatabase;Da Silva et al., 2017	0.10236
LPSDATVVL	LAMP1	Lysosome-associated membrane glycoprotein 1	HLA-B35:02	0.0019	9		0.10222
QAFGEKITM	SDCBP	Syntenin-1	HLA-B35:02	0.1441	9		0.1016
HPASAEFVL	COQ3	Ubiquinone biosynthesis O-methyltransferase, mitochondrial	HLA-B35:02	0.0048	9		0.1015
IPDSHEITL	WDR70	WD repeat-containing protein 70	HLA-B35:02	0.0039	9		0.10148
NPTQYEERM	ILKAP;ILKAP3	Integrin-linked kinase-associated serine/threonine phosphatase 2C	HLA-B35:02	0.17	9		0.10143
EGHEEMVAL	ANKRD17;ANKHD1	Ankyrin repeat domain-containing protein 17;Ankyrin repeat and KH domain-containing protein 1	HLA-B35:02	0.7198	9		0.10115
DINDQIPIF	CDH17	Cadherin-17	HLA-B35:02	0.8627	9		0.1011
YPARETQL	ETNK2	Ethanolamine kinase 2	HLA-B35:02	0.2834	8		0.10106
EVSTDAAVL	SPATS2L	SPATS2-like protein	HLA-B35:02	0.573	9		0.10093
QAEQEDRAL	HDLBP	Vigilin	HLA-B35:02	0.8252	9		0.10086
HPTGESIL	CENPJ	Centromere protein J	HLA-B35:02	0.4649	8		0.10079
LPTDSAIIM	TMEM209	Transmembrane protein 209	HLA-B35:02	0.005	9		0.10073
TPEIMAPIL	ADRM1	Proteasomal ubiquitin receptor ADRM1	HLA-B35:02	0.0465	9		0.10065
HPESGEEAV	SCAND2P;ZSCAN20;ZNF263;ZSCAN31;ZKSCAN7;ZKSCAN5	Putative SCAN domain-containing protein SCAND2P;Zinc finger and SCAN domain-containing protein 20;Zinc finger and SCAN domain-containing protein 31;Zinc finger protein 263;Zinc finger protein with KRAB and SCAN domains 7;Zinc finger protein with KRAB and SCAN domains 5	HLA-B35:02	0.0869	9	Bruggeman et al., 2018	0.10064
VPQLVEPVL	HEXDC	Hexosaminidase D	HLA-B35:02	0.0386	9		0.10045
YPKEEVGQYL	PTRHD1	Putative peptidyl-tRNA hydrolase PTRHD1	HLA-B35:02	0.0488	10		0.10043
YPFLLVGDLM	MTCH1	Mitochondrial carrier homolog 1	HLA-B35:02	0.2149	10		0.10038
TANNDHTVL	ANKRD17	Ankyrin repeat domain-containing protein 17	HLA-B35:02	0.2225	9		0.10032
DPESTEREL	RIMKLB	Beta-citrylglutamate synthase B	HLA-B35:02	0.2775	9		0.10026
TPGPEPLTL	RELB	Transcription factor RelB	HLA-B35:02	0.0303	9		0.10022
IPSSIEDIF	NAE1	NEDD8-activating enzyme E1 regulatory subunit	HLA-B35:02	0.0854	9		0.10016
LPLPEEPQL	KMT2D	Histone-lysine N-methyltransferase 2D	HLA-B35:02	0.0304	9		0.09995
LPPGDHNAL	TANK	TRAF family member-associated NF-kappa-B activator	HLA-B35:02	0.0382	9		0.09995
LPFQGAEVL	AKAP1	A-kinase anchor protein 1, mitochondrial	HLA-B35:02	0.0038	9		0.09989
LPGGEYQEL	SEMA4B	Semaphorin-4B	HLA-B35:02	0.0777	9		0.09986
EPMEGVPLE	INO80B;INO80B-WBP1	INO80 complex subunit B	HLA-B35:02	1.1935	9		0.09977
RVPNEEDPSL	TGFBR1	Receptor protein serine/threonine kinase;TGF-beta receptor type-1	HLA-B35:02	0.662	10		0.09975
SVEHHPPAL	KIF7	Kinesin-like protein	HLA-B35:02	0.715	9		0.09961
FPEALDNAL	YME1L1	ATP-dependent zinc metalloprotease YME1L1	HLA-B35:02	0.0032	9		0.09935
HPFEDGAKL	GAK	Cyclin-G-associated kinase	HLA-B35:02	0.004	9		0.09927
NAFKEITTM	GTF2B	Transcription initiation factor IIB	HLA-B35:02	0.0715	9		0.09922
FGHGAEDSL	SAA1	Serum amyloid A protein;Serum amyloid A-1 protein;Amyloid protein A;Serum amyloid protein A(2-104);Serum amyloid protein A(3-104);Serum amyloid protein A(2-103);Serum amyloid protein A(2-102);Serum amyloid protein A(4-101)	HLA-B35:02	1.4447	9		0.09901
TPVSREEAL	VNN1	Pantetheinase	HLA-B35:02	0.0338	9		0.09894
NPDYSEEIL	UTP6	U3 small nucleolar RNA-associated protein 6 homolog	HLA-B35:02	0.0343	9		0.09889
LPAPPDDFL	APBB1IP	Amyloid beta A4 precursor protein-binding family B member 1-interacting protein	HLA-B35:02	0.025	9		0.09874
MAVEGDHSM	NBEAL2	Neurobeachin-like protein 2	HLA-B35:02	0.0158	9		0.09867
LPYGDISEL	GALNT7	N-acetylgalactosaminyltransferase 7;Polypeptide N-acetylgalactosaminyltransferase	HLA-B35:02	0.0047	9		0.09866
HADQAEIRSL	IFIT3;IFIT2	Interferon-induced protein with tetratricopeptide repeats 3;Interferon-induced protein with tetratricopeptide repeats 2	HLA-B35:02	0.8802	10		0.09854
LPQHPDVEM	UBE2Q1	Ubiquitin-conjugating enzyme E2 Q1	HLA-B35:02	0.0182	9		0.09837
LPLGSEERPF	SEMA4B	Semaphorin-4B	HLA-B35:02	1.3588	10		0.09835
LPVHGEQAL	PASK	PAS domain-containing serine/threonine-protein kinase	HLA-B35:02	0.007	9		0.0983
QPNGEEMTL	UBA1	Ubiquitin-like modifier-activating enzyme 1	HLA-B35:02	0.0238	9		0.09823
FVSEISDEF	COPG2	Coatomer subunit gamma-2	HLA-B35:02	0.2904	9		0.09814
NSLGVVPYL	FOXC1	Forkhead box protein C1	HLA-B35:02	1.0657	9		0.09804
FPISREAFQAL	TWF1	Twinfilin-1	HLA-B35:02	0.2588	11		0.09803
SPDDDYHAL	CLEC16A	Protein CLEC16A	HLA-B35:02	0.0046	9		0.0978
HPIHADNCL	LEPREL1	Prolyl 3-hydroxylase 2	HLA-B35:02	0.0226	9		0.09777
LPDEASEAF	HTT	Huntingtin	HLA-B35:02	0.0085	9		0.09768
SPQAREDQL	POP4	Ribonuclease P protein subunit p29	HLA-B35:02	0.297	9		0.09746
LPAPDPEL	RSAD1	Radical S-adenosyl methionine domain-containing protein 1, mitochondrial	HLA-B35:02	0.1466	8		0.0972
HPAGDNVI	BOP1	Ribosome biogenesis protein BOP1	HLA-B35:02	0.4618	8		0.09715
SPLADLHAL	HBM	Hemoglobin subunit mu	HLA-B35:02	0.0155	9		0.09709
MADEAGSEA	FGA	Fibrinogen alpha chain;Fibrinopeptide A;Fibrinogen alpha chain	HLA-B35:02	0.545	9		0.09683
EHAGVISVL	LAMTOR5	Ragulator complex protein LAMTOR5	HLA-B35:02	0.9662	9		0.09678
LPDDDPTAV	COPG2	Coatomer subunit gamma-2	HLA-B35:02	0.0183	9		0.0963
YPATGDLL	LAMB2	Laminin subunit beta-2	HLA-B35:02	0.0824	8		0.09628
EAINVEQAF	RAB7A	Ras-related protein Rab-7a	HLA-B35:02	0.2046	9		0.09624
SAAHDYTL	PTPN11	Tyrosine-protein phosphatase non-receptor type 11	HLA-B35:02	1.949	8		0.09613
FPTADLTL	PRRC2B	Protein PRRC2B	HLA-B35:02	0.0449	8		0.09589
QAIEERQSL	MPEG1	Macrophage-expressed gene 1 protein	HLA-B35:02	0.2825	9		0.09575
HPDVDEHSV	FLNB	Filamin-B	HLA-B35:02	0.0371	9		0.09523
SPDVDPVL	PARD3	Partitioning defective 3 homolog	HLA-B35:02	0.2145	8		0.09474
FPISEETIKL	DDX50;DDX21	ATP-dependent RNA helicase DDX50;Nucleolar RNA helicase 2	HLA-B35:02	0.0262	10		0.09459
FPQHTIASL	GTF2H2C;GTF2H2	General transcription factor IIH subunit 2-like protein;General transcription factor IIH subunit 2	HLA-B35:02	0.0058	9		0.09439
LPDQTFTAL	ARFGEF3	Brefeldin A-inhibited guanine nucleotide-exchange protein 3	HLA-B35:02	0.0038	9		0.09426
QAVQEATRL	PLEC	Plectin	HLA-B35:02	0.728	9		0.09417
LPIFPDLQV	ATF6B	Cyclic AMP-dependent transcription factor ATF-6 beta;Processed cyclic AMP-dependent transcription factor ATF-6 beta	HLA-B35:02	0.0919	9		0.09404
TVSAADPEF	ANKRD27	Ankyrin repeat domain-containing protein 27	HLA-B35:02	1.1684	9		0.09379
LPAGDALYL	ARHGEF2	Rho guanine nucleotide exchange factor 2	HLA-B35:02	0.009	9		0.09371
TASADHTAL	WDR37	WD repeat-containing protein 37	HLA-B35:02	0.1586	9		0.09334
APLATGESL	GABRQ	Gamma-aminobutyric acid receptor subunit theta	HLA-B35:02	0.0979	9		0.09331
LPAYLVAAF	NOC4L	Nucleolar complex protein 4 homolog	HLA-B35:02	0.0414	9		0.09292
DPIDSFELL	CREB3L3	Cyclic AMP-responsive element-binding protein 3-like protein 3;Processed cyclic AMP-responsive element-binding protein 3-like protein 3	HLA-B35:02	0.0277	9		0.09264
YPNAGLTM	PLG	Plasminogen;Plasmin heavy chain A;Activation peptide;Angiostatin;Plasmin heavy chain A, short form;Plasmin light chain B	HLA-B35:02	0.0316	8		0.09259
EPEPEPPLL	BOP1	Ribosome biogenesis protein BOP1	HLA-B35:02	0.0453	9		0.09256
LPEPEPLPL	RBM42	RNA-binding protein 42	HLA-B35:02	0.0145	9		0.09256
SVSGIQAEL	CDH1	Cadherin-1;E-Cad/CTF1;E-Cad/CTF2;E-Cad/CTF3	HLA-B35:02	0.8334	9		0.09248
IPTEQVNEL	TMEM106C	Transmembrane protein 106C	HLA-B35:02	0.005	9		0.09245
NPELGYDAL	BBS2	Bardet-Biedl syndrome 2 protein	HLA-B35:02	0.0412	9		0.09244
LPDNVHYVF	SKIV2L2	Superkiller viralicidic activity 2-like 2	HLA-B35:02	0.0194	9		0.09234
MPHEELPSL	IQGAP2	Ras GTPase-activating-like protein IQGAP2	HLA-B35:02	0.003	9		0.09229
SVAEGDQTM	ZBTB5	Zinc finger and BTB domain-containing protein 5	HLA-B35:02	0.2555	9		0.09225
YADPAAYVM	PLEKHA6	Pleckstrin homology domain-containing family A member 6	HLA-B35:02	0.0082	9		0.09197
LPSGEDYNL	SUGT1	Suppressor of G2 allele of SKP1 homolog	HLA-B35:02	0.0358	9		0.09188
DPDRMFVEL	VPRBP	Protein VPRBP	HLA-B35:02	0.0393	9		0.09182
SPDCGGSIEVM	WDR36	WD repeat-containing protein 36	HLA-B35:02	0.5822	11		0.09175
EPDPDPEM	MBD3	Methyl-CpG-binding domain protein 3	HLA-B35:02	0.422	8	Bruggeman et al., 2018	0.0917
TPVSIEPRI	ELMSAN1	ELM2 and SANT domain-containing protein 1	HLA-B35:02	0.1306	9		0.09166
RPYDAEVSL	VPS13D	Vacuolar protein sorting-associated protein 13D	HLA-B35:02	0.0221	9		0.09165
NENINTMIL	DST	Dystonin	HLA-B35:02	1.2286	9		0.09162
NPVEYSIVM	SMPD4	Sphingomyelin phosphodiesterase 4	HLA-B35:02	0.0027	9		0.09126
FPEPDDVESL	MSL1	Male-specific lethal 1 homolog	HLA-B35:02	0.0335	10		0.09124
HPTEVLCLM	U2AF2	Splicing factor U2AF 65 kDa subunit	HLA-B35:02	0.0543	9		0.09113
LPPDTDPAF	NAPRT	Nicotinate phosphoribosyltransferase	HLA-B35:02	0.0415	9		0.0909
DPDTEQAAL			HLA-B35:02	0.0398	9		0.0906
SPDPEGGGSL	KMT2D	Histone-lysine N-methyltransferase 2D	HLA-B35:02	0.1957	10		0.09038
FPSEAPISL	KIAA0922	Transmembrane protein 131-like	HLA-B35:02	0.0007	9		0.09037
HPDLLTGDLTL	NFRKB	Nuclear factor related to kappa-B-binding protein	HLA-B35:02	0.2545	11		0.09024
FPDPEPVRNLQL	SEMA4A	Semaphorin-4A	HLA-B35:02	0.1615	12		0.09021
EVLSEEPIL	BZW1	Basic leucine zipper and W2 domain-containing protein 1	HLA-B35:02	0.9967	9		0.09008
FPVKEVFEL	DENND5A	DENN domain-containing protein 5A	HLA-B35:02	0.003	9		0.09006
YPVQEYFL	DHX9	ATP-dependent RNA helicase A	HLA-B35:02	0.1616	8		0.08966
IPVPIVSEL	F13A1	Coagulation factor XIII A chain	HLA-B35:02	0.0043	9		0.08958
LPQTGEQEL	INPPL1	Phosphatidylinositol 3,4,5-trisphosphate 5-phosphatase 2	HLA-B35:02	0.0372	9		0.08945
NPDEFYYKM	UTP11L	Probable U3 small nucleolar RNA-associated protein 11	HLA-B35:02	0.0172	9		0.08935
DVSAPDVEM	AHNAK	Neuroblast differentiation-associated protein AHNAK	HLA-B35:02	0.264	9		0.08909
TPVSFDETL	CENPE	Kinesin-like protein;Centromere-associated protein E	HLA-B35:02	0.0164	9	Bruggeman et al., 2018	0.08899
REFQEDPEM	DOCK8	Dedicator of cytokinesis protein 8	HLA-B35:02	1.4681	9		0.08896
MPSQFRDIL	EP300	Histone acetyltransferase p300	HLA-B35:02	0.0188	9		0.08894
IPIALSGRDIL	DDX6	Probable ATP-dependent RNA helicase DDX6	HLA-B35:02	1.3966	11		0.08887
FPEADAEKL	KMT2D	Histone-lysine N-methyltransferase 2D	HLA-B35:02	0.0128	9		0.0888
SALEKEEAL	OBFC1	CST complex subunit STN1	HLA-B35:02	0.2994	9		0.08876
KPSGNDVEM	TERF1	Telomeric repeat-binding factor 1	HLA-B35:02	0.0945	9		0.08832
FAMEIDPSL	ASNA1	ATPase ASNA1	HLA-B35:02	0.02	9		0.08821
IPHMDIEAL	RPL10A	60S ribosomal protein L10a	HLA-B35:02	0.0146	9		0.08804
MPVHAAVQM	HLTF	Helicase-like transcription factor	HLA-B35:02	0.0054	9		0.08804
LPEKEGEEL	PTRF	Polymerase I and transcript release factor	HLA-B35:02	0.0492	9		0.0879
SPDAPDFQL	CHD6	Chromodomain-helicase-DNA-binding protein 6	HLA-B35:02	0.0384	9		0.08777
LPDGSTIEI	ACTR1A	Alpha-centractin	HLA-B35:02	0.0151	9		0.08756
LPDTALPTL	CORO7-PAM16;CORO7	Coronin;Coronin-7	HLA-B35:02	0.0076	9	Bruggeman et al., 2018	0.08724
NPVDIVSTL	KAT7	Histone acetyltransferase;Histone acetyltransferase KAT7	HLA-B35:02	0.0036	9		0.08724
EPDTNLVAL	AHSA1	Activator of 90 kDa heat shock protein ATPase homolog 1	HLA-B35:02	0.007	9		0.08722
MPDVDLHL	AHNAK	Neuroblast differentiation-associated protein AHNAK	HLA-B35:02	0.1313	8		0.0872
MPDVDLHM	AHNAK	Neuroblast differentiation-associated protein AHNAK	HLA-B35:02	0.1563	8		0.0872
DASVEPDPL	NDUFB7	NADH dehydrogenase [ubiquinone] 1 beta subcomplex subunit 7	HLA-B35:02	0.5565	9		0.08714
TPDPTRPLTF	CYP4X1	Cytochrome P450 4X1	HLA-B35:02	0.0834	10		0.08712
LPQYRDAVM	DIEXF	Digestive organ expansion factor homolog	HLA-B35:02	0.0612	9		0.0871
MPFSPYEPLNFHAM	CLU	Clusterin;Clusterin;Clusterin beta chain;Clusterin alpha chain	HLA-B35:02	0.3947	14		0.08709
MPNDQEEESF	SDPR	Serum deprivation-response protein	HLA-B35:02	0.2421	10		0.08701
SPIGDDVQL	ARHGAP5	Rho GTPase-activating protein 5	HLA-B35:02	0.0195	9		0.08694
LPSTTIVSM	AGL	Glycogen debranching enzyme;4-alpha-glucanotransferase;Amylo-alpha-1,6-glucosidase	HLA-B35:02	0.0077	9		0.08662
DPDFQPEL	TXNL1	Thioredoxin-like protein 1	HLA-B35:02	0.6746	8		0.08626
LPEEDSGEL	STRAP	Serine-threonine kinase receptor-associated protein	HLA-B35:02	0.0379	9		0.08622
HPLEEKDLWSL	ABCC3	Canalicular multispecific organic anion transporter 2	HLA-B35:02	0.5507	11		0.08609
DPNVDEHSV	FLNA;FLNC	Filamin-A;Filamin-C	HLA-B35:02	0.2201	9		0.08593
HPQPIDPLL	CAND1	Cullin-associated NEDD8-dissociated protein 1	HLA-B35:02	0.0083	9		0.08588
SPERAAQVM	FUBP3	Far upstream element-binding protein 3	HLA-B35:02	0.1157	9		0.08587
HPSFPEVSF	INSR	Insulin receptor;Insulin receptor subunit alpha;Insulin receptor subunit beta	HLA-B35:02	0.0331	9		0.08573
TPDGTEKGDFL	HK2	Hexokinase;Hexokinase-2	HLA-B35:02	1.2989	11		0.08562
LPNVDLVL	LAMB3	Laminin subunit beta-3	HLA-B35:02	0.1899	8		0.08544
EAAGQEAVL	TMC6	Transmembrane channel-like protein 6	HLA-B35:02	0.1275	9		0.08539
MPDSELFEL	POLE	DNA polymerase;DNA polymerase epsilon catalytic subunit A	HLA-B35:02	0.0048	9		0.08509
EAHADNYTM	N4BP1	NEDD4-binding protein 1	HLA-B35:02	0.0658	9		0.08494
VPHQEVVGL	PPM1F	Protein phosphatase 1F	HLA-B35:02	0.0377	9		0.08494
YPTPYPEDL	LRRC7	Leucine-rich repeat-containing protein 7	HLA-B35:02	0.0159	9		0.08486
FPAVDDNLL	TOP2B	DNA topoisomerase 2;DNA topoisomerase 2-beta	HLA-B35:02	0.005	9		0.08478
MPVGPAPGM	SNRPC	U1 small nuclear ribonucleoprotein C	HLA-B35:02	0.01	9		0.08397
FPEELTQTF	EEF1G	Elongation factor 1-gamma	HLA-B35:02	0.0057	9		0.08391
SPSAPEPVV	SEC14L1	SEC14-like protein 1	HLA-B35:02	0.1448	9		0.08388
LPAEEGKTL	ATP2A2;ATP2A1	Sarcoplasmic/endoplasmic reticulum calcium ATPase 2;Sarcoplasmic/endoplasmic reticulum calcium ATPase 1	HLA-B35:02	0.0077	9		0.08353
LPELTTESL	STRIP2	Striatin-interacting protein 2	HLA-B35:02	0.0219	9		0.08352
QAAPPTAAM	NKX2-1	Homeobox protein Nkx-2.1	HLA-B35:02	0.0405	9		0.08316
LPDAEAQL	TMEM128	Transmembrane protein 128	HLA-B35:02	0.2953	8		0.08314
FPAGILQAPF	ECE1;ECE2	Endothelin-converting enzyme 1	HLA-B35:02	0.1655	10		0.0831
SPVTQEPEL	POGZ	Pogo transposable element with ZNF domain	HLA-B35:02	0.0351	9		0.08305
NVTTDISVL	HMCN1	Hemicentin-1	HLA-B35:02	0.8037	9		0.08304
VPDHQDIAF	GALNT2	Polypeptide N-acetylgalactosaminyltransferase 2;Polypeptide N-acetylgalactosaminyltransferase 2 soluble form	HLA-B35:02	0.0323	9		0.08301
EPDPTYEEKM	SMARCA5	SWI/SNF-related matrix-associated actin-dependent regulator of chromatin subfamily A member 5	HLA-B35:02	0.279	10		0.08299
HPDVDEHSVM	FLNB	Filamin-B	HLA-B35:02	0.0442	10		0.08279
APSDDATAL	GPX1	Glutathione peroxidase;Glutathione peroxidase 1	HLA-B35:02	0.0238	9		0.08267
SPDREGPSL	ARHGAP33	Rho GTPase-activating protein 33	HLA-B35:02	0.0358	9		0.08266
APFPDDPTL	ASTN1	Astrotactin-1	HLA-B35:02	0.0179	9		0.08264
IPMPDFDL	AHNAK	Neuroblast differentiation-associated protein AHNAK	HLA-B35:02	0.3258	8		0.08236
IPILYEHQL	PRRC2C	Protein PRRC2C	HLA-B35:02	0.0303	9		0.08231
FPEDVSEEL	RDX	Radixin	HLA-B35:02	0.0032	9		0.08229
YPEDVSEEL	MSN	Moesin	HLA-B35:02	0.0027	9		0.08229
LPEAPAPLL	BCL2L13	Bcl-2-like protein 13	HLA-B35:02	0.0277	9		0.08206
DPSLTEPVI	PPP2R5E	Serine/threonine-protein phosphatase 2A 56 kDa regulatory subunit epsilon isoform	HLA-B35:02	0.1838	9		0.08195
YADGESFL	PSMB4	Proteasome subunit beta type-4	HLA-B35:02	1.2036	8		0.08187
LAEAESRVL	TRIP10	Cdc42-interacting protein 4	HLA-B35:02	0.475	9		0.08144
IPDFLTHSL	MTMR14	Myotubularin-related protein 14	HLA-B35:02	0.0053	9		0.08138
DPSADPEL	PIPSL;PSMD4	Putative PIP5K1A and PSMD4-like protein;26S proteasome non-ATPase regulatory subunit 4	HLA-B35:02	1.2463	8	Bruggeman et al., 2018	0.08133
FPFAVANQL	EIF2AK1	Eukaryotic translation initiation factor 2-alpha kinase 1	HLA-B35:02	0.0031	9		0.08126
HPDSIEYGL	HDAC8	Histone deacetylase 8	HLA-B35:02	0.0182	9		0.08126
NPDEAEKAL	RNPS1	RNA-binding protein with serine-rich domain 1	HLA-B35:02	0.0154	9		0.08116
WADEAEKAL	SELPLG	P-selectin glycoprotein ligand 1	HLA-B35:02	0.0757	9		0.08116
HPDSEHIL	WDR59	WD repeat-containing protein 59	HLA-B35:02	0.215	8		0.081
DTDPLVTVM	PSMC1	26S protease regulatory subunit 4	HLA-B35:02	0.1724	9		0.08098
HAVQTVETM	GEMIN6	Gem-associated protein 6	HLA-B35:02	0.1003	9		0.08068
TPEWVQLSA	BAZ2A		HLA-B35:02	0.5014	9		0.08053
EPSPDFPAL	PIK3R2	Phosphatidylinositol 3-kinase regulatory subunit beta	HLA-B35:02	0.0074	9	Bruggeman et al., 2018	0.08044
SPHPETRSM	EPG5	Ectopic P granules protein 5 homolog	HLA-B35:02	0.0461	9		0.0804
VPESRDEEM	SETX	Probable helicase senataxin	HLA-B35:02	0.1651	9		0.08031
FPVEHVQLL	DHX58	Probable ATP-dependent RNA helicase DHX58	HLA-B35:02	0.002	9		0.08027
QPDQTLEIL	AMD1	S-adenosylmethionine decarboxylase proenzyme;S-adenosylmethionine decarboxylase alpha chain;S-adenosylmethionine decarboxylase beta chain	HLA-B35:02	0.0373	9		0.08026
QPQVEESVL	NOP56	Nucleolar protein 56	HLA-B35:02	0.1477	9		0.08019
LPSEHQTIL	2020-03-07	E3 ubiquitin-protein ligase MARCH7	HLA-B35:02	0.0073	9		0.08003
QASLEIDSL	HSPA1B;HSPA1A	Heat shock 70 kDa protein 1B;Heat shock 70 kDa protein 1A	HLA-B35:02	0.9846	9		0.07998
IATTEALSM	MX2;MX1	Interferon-induced GTP-binding protein Mx2;Interferon-induced GTP-binding protein Mx1;Interferon-induced GTP-binding protein Mx1, N-terminally processed	HLA-B35:02	0.4956	9		0.07997
APHSRETEL	SOGA1	Protein SOGA1;N-terminal form;C-terminal 80 kDa form	HLA-B35:02	0.2252	9		0.07994
LPDEFSPAV	RNF213	E3 ubiquitin-protein ligase RNF213	HLA-B35:02	0.0168	9		0.07972
MVSDEYEQL	RPL10;RPL10L	60S ribosomal protein L10-like;60S ribosomal protein L10	HLA-B35:02	0.6328	9	Da Silva et al., 2017;Wang et al., 2016	0.07946
TVITPDPNL	POLR2A	DNA-directed RNA polymerase II subunit RPB1	HLA-B35:02	0.9252	9		0.0792
MPLNVADLI	EIF4A1	Eukaryotic initiation factor 4A-I	HLA-B35:02	0.0549	9		0.07916
TPDYLAPEL	MASTL	Serine/threonine-protein kinase greatwall	HLA-B35:02	0.0146	9		0.07865
LPDVDLDL	AHNAK	Neuroblast differentiation-associated protein AHNAK	HLA-B35:02	0.6814	8		0.07862
HPDPVGPGL	MUC16	Mucin-16	HLA-B35:02	0.0066	9		0.07858
LPEEQDRLL	KIF15	Kinesin-like protein;Kinesin-like protein KIF15	HLA-B35:02	0.0605	9	Bruggeman et al., 2018;Wang et al., 2016	0.07853
EVIPYTPAM	HMOX1	Heme oxygenase 1	HLA-B35:02	0.0775	9		0.07848
NPAYADPGM	GUCD1	Protein GUCD1	HLA-B35:02	0.0448	9		0.0784
IPVESEVNL	HELLS	Lymphoid-specific helicase	HLA-B35:02	0.0096	9		0.07836
APAPESITL	CHD8	Chromodomain-helicase-DNA-binding protein 8	HLA-B35:02	0.009	9		0.07831
FPALFGDVKF	UPP1	Uridine phosphorylase 1	HLA-B35:02	0.1238	10		0.07826
LPPEMEVAL	MAP4	Microtubule-associated protein 4;Microtubule-associated protein	HLA-B35:02	0.0105	9		0.0781
QADNPHVAL	HYOU1	Hypoxia up-regulated protein 1	HLA-B35:02	0.0915	9		0.07804
LPDGPDAPA	SNAP29	Synaptosomal-associated protein 29	HLA-B35:02	0.4301	9		0.07792
HPEDGEKIA	DOCK4	Dedicator of cytokinesis protein 4	HLA-B35:02	0.9371	9		0.07783
RPAVLDPAL	ITGA3	Integrin alpha-3;Integrin alpha-3 heavy chain;Integrin alpha-3 light chain	HLA-B35:02	0.0547	9		0.07782
FPGFFSPM	FGA	Fibrinogen alpha chain;Fibrinopeptide A;Fibrinogen alpha chain	HLA-B35:02	0.7788	8		0.07771
WPDLHTPAL	TNS1	Tensin-1	HLA-B35:02	0.0051	9		0.07758
TPAPPTHAL	SNAPC4	snRNA-activating protein complex subunit 4	HLA-B35:02	0.003	9		0.07744
FPSGIIKVF	FCHO2	F-BAR domain only protein 2	HLA-B35:02	0.0136	9		0.0774
YDVGISAAI	P2RY10	Putative P2Y purinoceptor 10	HLA-B35:02	1.2262	9		0.07725
NAEGGESAL	SMARCA2	Probable global transcription activator SNF2L2	HLA-B35:02	0.1779	9		0.07709
EPTGEVLSL	SNRNP200	U5 small nuclear ribonucleoprotein 200 kDa helicase	HLA-B35:02	0.0253	9		0.07704
HATEELKEF	TWF2	Twinfilin-2	HLA-B35:02	0.8092	9		0.07691
LPEEEQQRVL	UBTF	Nucleolar transcription factor 1	HLA-B35:02	0.2456	10		0.07671
NAAFPDTSM	ARFGEF1;ARFGEF2	Brefeldin A-inhibited guanine nucleotide-exchange protein 1;Brefeldin A-inhibited guanine nucleotide-exchange protein 2	HLA-B35:02	0.0968	9		0.07668
SAHDNDANL	F13A1	Coagulation factor XIII A chain	HLA-B35:02	0.3917	9		0.07664
QPSDVLELL	OSCAR	Osteoclast-associated immunoglobulin-like receptor	HLA-B35:02	0.0356	9		0.0764
LADHPDAPM	MORF4L1	Mortality factor 4-like protein 1	HLA-B35:02	0.3237	9		0.07637
IPCPTVVLL	RIOK3	Serine/threonine-protein kinase RIO3	HLA-B35:02	0.117	9		0.07636
MAEGKEIDF	PHLDA1	Pleckstrin homology-like domain family A member 1	HLA-B35:02	1.2728	9		0.07613
YPDDDEAML	ANKLE2	Ankyrin repeat and LEM domain-containing protein 2	HLA-B35:02	0.0065	9		0.07579
MPDAPDHESL	MSH5	MutS protein homolog 5	HLA-B35:02	0.0289	10		0.07566
YPFESAEAQL	RRM1	Ribonucleoside-diphosphate reductase large subunit	HLA-B35:02	0.0125	10		0.07534
HPVDDIDKM	KIAA0100	Protein KIAA0100	HLA-B35:02	0.0084	9	CTDatabase	0.07532
HPDPDAELQRM	RBM25	RNA-binding protein 25	HLA-B35:02	0.488	11		0.07528
MPIYEAADKAL	UBR4	E3 ubiquitin-protein ligase UBR4	HLA-B35:02	0.2906	11		0.07492
LPSDVREQM	LRRC8C	Volume-regulated anion channel subunit LRRC8C	HLA-B35:02	0.0193	9		0.07436
SPDPLRPLEF	FLYWCH1	FLYWCH-type zinc finger-containing protein 1	HLA-B35:02	0.1806	10		0.07434
QASTQEEAL	ALDH16A1	Aldehyde dehydrogenase family 16 member A1	HLA-B35:02	0.9649	9		0.07417
HPIAKEETV	VCAN	Versican core protein	HLA-B35:02	0.0496	9		0.074
QAEEGSARL	MTDH	Protein LYRIC	HLA-B35:02	0.4673	9		0.07378
TASLEPGAL	PPP1R10	Serine/threonine-protein phosphatase 1 regulatory subunit 10	HLA-B35:02	0.5642	9		0.07366
LPENGHPLM	LPAR2	Lysophosphatidic acid receptor 2	HLA-B35:02	0.0352	9		0.0736
YPGLADPVF	FAM65B	Protein FAM65B	HLA-B35:02	0.0306	9		0.07358
FPHVGEPSL	NLRC3	Protein NLRC3	HLA-B35:02	0.0039	9		0.07327
DPNRDGHVSL	SPTAN1	Spectrin alpha chain, non-erythrocytic 1	HLA-B35:02	0.2273	10		0.07321
QPITSPEIL	FERMT2	Fermitin family homolog 2	HLA-B35:02	0.056	9		0.07298
HPVDVSFGDLL	PAM	Peptidyl-glycine alpha-amidating monooxygenase;Peptidylglycine alpha-hydroxylating monooxygenase;Peptidyl-alpha-hydroxyglycine alpha-amidating lyase	HLA-B35:02	0.2181	11		0.07296
SATPDTPTL	CASZ1	Zinc finger protein castor homolog 1	HLA-B35:02	0.149	9		0.0729
QAALERQAL	G0S2	G0/G1 switch protein 2	HLA-B35:02	0.6336	9		0.07286
MPEYNAPAL	AMOTL1	Angiomotin-like protein 1	HLA-B35:02	0.0026	9		0.07281
MPFTTVSEL	MED24	Mediator of RNA polymerase II transcription subunit 24	HLA-B35:02	0.0053	9		0.0726
FPDPAHPNTL	TFR2	Transferrin receptor protein 2	HLA-B35:02	0.0045	10		0.07242
HISNLEPEL	SFXN3	Sideroflexin;Sideroflexin-3	HLA-B35:02	1.5494	9		0.07238
LPIEDQISL	NR1I3;NR1I2	Nuclear receptor subfamily 1 group I member 3;Nuclear receptor subfamily 1 group I member 2	HLA-B35:02	0.0022	9		0.07217
SPTQVEDAM	TSPAN32	Tetraspanin-32	HLA-B35:02	0.0301	9		0.07207
TADGDLYTL	RCC1	Regulator of chromosome condensation	HLA-B35:02	0.1067	9		0.07202
IPNPQERTLTL	HSP90AB1	Heat shock protein HSP 90-beta	HLA-B35:02	0.3865	11		0.0717
FPSYRDVTL	C9orf64	UPF0553 protein C9orf64	HLA-B35:02	0.0033	9		0.07138
HVTGSEAEL	ERBB3	Receptor tyrosine-protein kinase erbB-3	HLA-B35:02	0.9862	9		0.07137
FPERKEREM	NDUFB7	NADH dehydrogenase [ubiquinone] 1 beta subcomplex subunit 7	HLA-B35:02	0.1313	9		0.07101
QPDDLINQL	FAF2	FAS-associated factor 2	HLA-B35:02	0.0166	9		0.07086
MPTSEETL	NBR1	Next to BRCA1 gene 1 protein	HLA-B35:02	0.2723	8		0.07064
NVDPDNVVL	GADD45A	Growth arrest and DNA damage-inducible protein GADD45 alpha	HLA-B35:02	0.1048	9		0.07051
LPLALGLAL	CST6	Cystatin-M	HLA-B35:02	0.0312	9		0.07037
FPQDRVFML	BIRC6	Baculoviral IAP repeat-containing protein 6	HLA-B35:02	0.0143	9		0.07018
FPTQAELDRL	ZHX2	Zinc fingers and homeoboxes protein 2	HLA-B35:02	0.2415	10		0.07016
LPSDTRLVL	SERPING1	Plasma protease C1 inhibitor	HLA-B35:02	0.0069	9		0.0699
HPVNIKELEM	DST		HLA-B35:02	0.1841	10		0.06988
RPDTLDPAL	PSMC2;PSMC6	26S protease regulatory subunit 7;26S protease regulatory subunit 10B	HLA-B35:02	0.052	9		0.06984
HPAFPSILL	DKFZp762C0813;KIAA1467	Uncharacterized protein KIAA1467	HLA-B35:02	0.0081	9		0.06981
NPDPADLVL	TEF	Thyrotroph embryonic factor	HLA-B35:02	0.0045	9		0.06978
IAQLDPEAL	CDCA8	Borealin	HLA-B35:02	0.4516	9	Wang et al., 2016	0.06976
HAIEDKETI	SAFB	Scaffold attachment factor B1	HLA-B35:02	0.2434	9		0.06973
APHTTEPML	RELA	Transcription factor p65	HLA-B35:02	0.2065	9		0.06965
MPLLRQEEL	EHD2	EH domain-containing protein 2	HLA-B35:02	0.0321	9		0.0696
RPAPPEPPA	INAFM2	Putative transmembrane protein INAFM2	HLA-B35:02	1.0465	9		0.06915
TAEELQATL	SPECC1	Cytospin-B	HLA-B35:02	0.141	9		0.06911
DAQADPAAL	SBNO2	Protein strawberry notch homolog 2	HLA-B35:02	0.099	9		0.06881
EPHPADPGM	TNKS1BP1	182 kDa tankyrase-1-binding protein	HLA-B35:02	0.0872	9		0.06876
VPAPDGQFAF	HES1	Transcription factor HES-1	HLA-B35:02	0.1183	10		0.06876
LPTHLDPAM	NCOR1	Nuclear receptor corepressor 1	HLA-B35:02	0.0192	9		0.06873
TAVALLRLL	MLEC	Malectin	HLA-B35:02	1.5533	9		0.06873
DAEADVASL	TPM2b;TPM2;TPM1	Tropomyosin beta chain;Tropomyosin alpha-1 chain	HLA-B35:02	0.1147	9		0.06869
SPHEESISL	KMT2C	Histone-lysine N-methyltransferase 2C	HLA-B35:02	0.0079	9		0.06868
IPIGIDKAL	FKBP5	Peptidyl-prolyl cis-trans isomerase FKBP5;Peptidyl-prolyl cis-trans isomerase FKBP5, N-terminally processed	HLA-B35:02	0.0081	9		0.06864
HAAELIKTV	PDCD6IP	Programmed cell death 6-interacting protein	HLA-B35:02	0.359	9		0.06861
EAAPDGPAL	DDX51	ATP-dependent RNA helicase DDX51	HLA-B35:02	0.024	9		0.06854
EPDPADLAL	DBP;HLF	Hepatic leukemia factor;D site-binding protein	HLA-B35:02	0.0071	9		0.06852
FPTPDPAAL	EP300;CREBBP	Histone acetyltransferase p300;CREB-binding protein	HLA-B35:02	0.0011	9		0.06848
FPDLGQEVAL	APOB	Apolipoprotein B-100;Apolipoprotein B-48	HLA-B35:02	0.0163	10		0.06819
FPVLDANDL	FXYD3	FXYD domain-containing ion transport regulator 3	HLA-B35:02	0.0086	9		0.06817
IPCPEPIML	RIOK1	Serine/threonine-protein kinase RIO1	HLA-B35:02	0.1014	9		0.06812
IPDGSEKGDFIAL	HK1	Hexokinase-1;Hexokinase	HLA-B35:02	0.3952	13		0.06768
HPETRSAFL	RQCD1	Cell differentiation protein RCD1 homolog	HLA-B35:02	0.1484	9		0.06765
NAMRADPAL	CHD6	Chromodomain-helicase-DNA-binding protein 6	HLA-B35:02	0.0957	9		0.06756
SPFSFHHVL	ITGB7	Integrin beta-7;Integrin beta	HLA-B35:02	0.0169	9		0.0674
MPTKTIEVL	MRPL48	39S ribosomal protein L48, mitochondrial	HLA-B35:02	0.0054	9		0.0673
LPDNDLTTL	ERBB2IP	Protein LAP2	HLA-B35:02	0.0076	9		0.06729
LPAEEGKTLL	ATP2A2	Sarcoplasmic/endoplasmic reticulum calcium ATPase 2	HLA-B35:02	0.1254	10		0.06723
HPDPERRPSAM	WEE1	Wee1-like protein kinase	HLA-B35:02	0.2062	11		0.06714
TPSEDQEAL	KDM2B	Lysine-specific demethylase 2B	HLA-B35:02	0.0152	9		0.06697
SVVAVPLPL			HLA-B35:02	0.9565	9		0.06669
HPDFDASTL	MSH6	DNA mismatch repair protein Msh6	HLA-B35:02	0.005	9		0.06649
HPFRDLTQL	SEC24B	Protein transport protein Sec24B	HLA-B35:02	0.0209	9		0.06632
LPAPIEKTI	IGHG1;IGHG3;IGHG2	Ig gamma-1 chain C region;Ig gamma-3 chain C region;Ig gamma-2 chain C region	HLA-B35:02	0.0346	9		0.06607
EPLVNDLTL	IKBIP	Inhibitor of nuclear factor kappa-B kinase-interacting protein	HLA-B35:02	0.0261	9		0.06584
DADLREQAL	LAMB3	Laminin subunit beta-3	HLA-B35:02	0.2035	9		0.06579
LPQNIPPL			HLA-B35:02	0.5284	8		0.06569
FPITDVLQM	ASCC3	Activating signal cointegrator 1 complex subunit 3	HLA-B35:02	0.0038	9		0.06568
NATNVEQAF	RAB1B;RAB1C	Ras-related protein Rab-1B;Putative Ras-related protein Rab-1C	HLA-B35:02	0.387	9		0.06564
SPDFDNQTL	MCRS1	Microspherule protein 1	HLA-B35:02	0.0179	9		0.06543
LPAEVLDSL	TGFBI	Transforming growth factor-beta-induced protein ig-h3	HLA-B35:02	0.0042	9		0.06527
TPEFMAPEM	WNK1;WNK4;WNK2;WNK3	Serine/threonine-protein kinase WNK1;Serine/threonine-protein kinase WNK4;Serine/threonine-protein kinase WNK2;Serine/threonine-protein kinase WNK3	HLA-B35:02	0.0376	9	Bruggeman et al., 2018	0.06527
MPVPWPESSL	GPNMB	Transmembrane glycoprotein NMB	HLA-B35:02	0.0433	10		0.06511
YPENGVVQM	UHRF1	E3 ubiquitin-protein ligase UHRF1	HLA-B35:02	0.0028	9		0.06501
YPTPYPDEL	ERBB2IP	Protein LAP2	HLA-B35:02	0.0026	9		0.06462
EPLSGEEAL	STAG2	Cohesin subunit SA-2	HLA-B35:02	0.0319	9		0.06454
EPHDISVAL	KIAA1429	Protein virilizer homolog	HLA-B35:02	0.0065	9		0.06439
HPDPNNENI	PRPF8	Pre-mRNA-processing-splicing factor 8	HLA-B35:02	0.0405	9		0.06437
EAAPLDGVL	MSLN	Mesothelin;Megakaryocyte-potentiating factor;Mesothelin, cleaved form	HLA-B35:02	0.1339	9		0.06434
IPDDQIGLL	COMT		HLA-B35:02	0.0207	9		0.06412
QAAPDLHVL	FBXO32	F-box only protein 32	HLA-B35:02	0.1336	9		0.06412
TAMDVVYAL	HIST1H4A	Histone H4	HLA-B35:02	0.023	9		0.06412
TAYGPDYVL	HDAC8	Histone deacetylase 8	HLA-B35:02	0.0727	9		0.06398
VPDGFLSEL	MIF	Macrophage migration inhibitory factor	HLA-B35:02	0.0173	9		0.06374
MPDDLLTTL	ATF4	Cyclic AMP-dependent transcription factor ATF-4	HLA-B35:02	0.0012	9		0.06372
LPEPNILQL	RAVER1	Ribonucleoprotein PTB-binding 1	HLA-B35:02	0.0069	9		0.06328
NAVAGESAL	IPO5	Importin-5	HLA-B35:02	0.1098	9		0.06326
LPHISDVVL	EIF4G1	Eukaryotic translation initiation factor 4 gamma 1	HLA-B35:02	0.0163	9		0.06316
SAISEGTVL	E4F1	Transcription factor E4F1	HLA-B35:02	0.1684	9		0.06301
SPDPTRESVL	OLFML2B	Olfactomedin-like protein 2B	HLA-B35:02	0.123	10		0.06299
TPLNDNVTI	NCR3LG1	Natural cytotoxicity triggering receptor 3 ligand 1	HLA-B35:02	0.0521	9		0.06292
LPEENQPVVF	TNC	Tenascin	HLA-B35:02	0.1093	10		0.06267
IPDEVLQTL	ZNF148	Zinc finger protein 148	HLA-B35:02	0.0036	9		0.06263
LADGSIAVL	NUP214	Nuclear pore complex protein Nup214	HLA-B35:02	0.0989	9		0.06262
IPDTENQTL	KIAA1217	Sickle tail protein homolog	HLA-B35:02	0.0158	9		0.06259
TPEGLPNTL	BAZ1B	Tyrosine-protein kinase BAZ1B	HLA-B35:02	0.0152	9		0.06258
SPSPEYTL	BCAM	Basal cell adhesion molecule	HLA-B35:02	0.2726	8		0.06192
TVSDLEPHM	EPHA2	Ephrin type-A receptor 2	HLA-B35:02	0.9988	9		0.06161
SPEPYHPTL	LHFPL2	Lipoma HMGIC fusion partner-like 2 protein	HLA-B35:02	0.0141	9		0.06151
SPDEVAKEL	SH3BP4	SH3 domain-binding protein 4	HLA-B35:02	0.0152	9		0.06148
IPPPPPEDF	ZYX	Zyxin	HLA-B35:02	0.3087	9		0.06146
FPESERPEM	PUF60	Poly(U)-binding-splicing factor PUF60	HLA-B35:02	0.0074	9		0.06139
LPEDLYHLI	RPS13	40S ribosomal protein S13	HLA-B35:02	0.0592	9		0.06136
FPEILQPVV	TMEM115	Transmembrane protein 115	HLA-B35:02	0.043	9		0.06134
LPLDDALLS	DPCD	Protein DPCD	HLA-B35:02	1.52	9		0.06131
YPDLENPPLL	RARS	Arginine--tRNA ligase, cytoplasmic	HLA-B35:02	0.0221	10		0.06096
EASPDRTTL	ARHGEF10	Rho guanine nucleotide exchange factor 10	HLA-B35:02	0.1225	9		0.0609
HAALETQTL	MUC20	Mucin-20	HLA-B35:02	0.1013	9		0.0605
LPEEISGLTSL	LRRC1	Leucine-rich repeat-containing protein 1	HLA-B35:02	0.3531	11		0.06041
APSQDFFL	DPY19L4	Probable C-mannosyltransferase DPY19L4	HLA-B35:02	1.4263	8		0.06034
NPLHLDYVM	UBA1	Ubiquitin-like modifier-activating enzyme 1	HLA-B35:02	0.0336	9		0.06003
FPAFEKVL	GSTA2;GSTA3;GSTA5;GSTA1	Glutathione S-transferase A2;Glutathione S-transferase;Glutathione S-transferase A5;Glutathione S-transferase A3;Glutathione S-transferase A1;Glutathione S-transferase A1, N-terminally processed	HLA-B35:02	0.1698	8	Da Silva et al., 2017	0.05984
YPIEKFISL	MPDZ	Multiple PDZ domain protein	HLA-B35:02	0.0021	9		0.05981
QPDEEPMDM	MGEA5	Protein O-GlcNAcase	HLA-B35:02	0.0669	9		0.05977
FPDSVEEL	TOMM34	Mitochondrial import receptor subunit TOM34	HLA-B35:02	0.0443	8		0.05968
SASADVLAL	UQCRFS1;UQCRFS1P1	Cytochrome b-c1 complex subunit Rieske, mitochondrial;Cytochrome b-c1 complex subunit 11;Putative cytochrome b-c1 complex subunit Rieske-like protein 1	HLA-B35:02	0.2035	9		0.05963
IPVTIMDVF	SPG21	Maspardin	HLA-B35:02	0.0904	9		0.0596
FPDHVDTQHL	TTC8	Tetratricopeptide repeat protein 8	HLA-B35:02	0.054	10		0.05923
QPYSQEWEL	SLC7A6OS	Probable RNA polymerase II nuclear localization protein SLC7A6OS	HLA-B35:02	0.0242	9		0.05922
FPSNLVTEM	SLC38A10	Putative sodium-coupled neutral amino acid transporter 10	HLA-B35:02	0.0033	9		0.05911
MPMTPGAAL	IRS2	Insulin receptor substrate 2	HLA-B35:02	0.0026	9		0.05904
EAHAELDSL	CCDC88B	Coiled-coil domain-containing protein 88B	HLA-B35:02	0.2913	9		0.05899
TPFLYDLVM	RBBP7;RBBP4	Histone-binding protein RBBP7;Histone-binding protein RBBP4	HLA-B35:02	0.0228	9		0.05888
LPFVGEKVTEML	PPP3CA;PPP3CC;PPP3CB	Serine/threonine-protein phosphatase;Serine/threonine-protein phosphatase 2B catalytic subunit alpha isoform;Serine/threonine-protein phosphatase 2B catalytic subunit gamma isoform;Serine/threonine-protein phosphatase 2B catalytic subunit beta isoform	HLA-B35:02	1.8204	12		0.05868
SAAAVDAGMAM	PTBP1	Polypyrimidine tract-binding protein 1	HLA-B35:02	1.7713	11		0.05853
VPDHPVLL	KIF21A	Kinesin-like protein KIF21A	HLA-B35:02	0.2575	8		0.05845
GPEGDANVSV	SLC6A5	Sodium- and chloride-dependent glycine transporter 2	HLA-B35:02	1.6499	10	Da Silva et al., 2017;Djureinovic et al., 2016	0.05839
SVEVDGHSM	PTPRF	Receptor-type tyrosine-protein phosphatase F	HLA-B35:02	0.715	9		0.05818
FPDTPLAL	ILF3	Interleukin enhancer-binding factor 3	HLA-B35:02	0.019	8		0.05804
TPISNEVEM	KMT2E	Histone-lysine N-methyltransferase 2E	HLA-B35:02	0.0073	9		0.05802
HPDPTRLLLF	TBL3	Transducin beta-like protein 3	HLA-B35:02	0.1379	10		0.05796
EPSADAPAA	ITM2B	Integral membrane protein 2B;BRI2, membrane form;BRI2 intracellular domain;BRI2C, soluble form;Bri23 peptide	HLA-B35:02	0.6148	9		0.0576
MVEELEKAL	KARS	Lysine--tRNA ligase	HLA-B35:02	0.3998	9		0.05756
TAAGGESAL	MAP2	Microtubule-associated protein 2	HLA-B35:02	0.135	9		0.05729
HVIDTGDSL	FLT4;VEGFR3	Vascular endothelial growth factor receptor 3;Receptor protein-tyrosine kinase	HLA-B35:02	0.1733	9		0.05728
FPAKFVEVL	SGSM3	Small G protein signaling modulator 3	HLA-B35:02	0.0037	9		0.05718
HPSADTPTA	RANBP3	Ran-binding protein 3	HLA-B35:02	0.233	9		0.05713
HPLQPDFFL	HSDL2	Hydroxysteroid dehydrogenase-like protein 2	HLA-B35:02	0.0339	9		0.05712
FPLHLPLEL	MADD	MAP kinase-activating death domain protein	HLA-B35:02	0.0069	9		0.05685
APAGETLSVL	ZNF121	Zinc finger protein 121	HLA-B35:02	0.2945	10		0.05616
LPDLTPTF	LAMB3	Laminin subunit beta-3	HLA-B35:02	0.2007	8		0.05616
IASATEVSL	TRO	Trophinin	HLA-B35:02	0.2625	9		0.0559
FPFSGETVF	F8	Coagulation factor VIII;Factor VIIIa heavy chain, 200 kDa isoform;Factor VIIIa heavy chain, 92 kDa isoform;Factor VIII B chain;Factor VIIIa light chain	HLA-B35:02	0.0026	9		0.05566
FPSNFIKEL	SH3KBP1	SH3 domain-containing kinase-binding protein 1	HLA-B35:02	0.0071	9		0.05557
DADPEAQAL	TLDC1	TLD domain-containing protein 1	HLA-B35:02	0.0331	9		0.05547
LPDEDLASF	FAM120A	Constitutive coactivator of PPAR-gamma-like protein 1	HLA-B35:02	0.0134	9		0.05547
NAEPEPRSL	2020-09-08	Septin-8	HLA-B35:02	0.2821	9		0.05542
VPNPDPVTM	RACGAP1	Rac GTPase-activating protein 1	HLA-B35:02	0.0034	9		0.05542
HAVGDDAQF	EIF4EBP2	Eukaryotic translation initiation factor 4E-binding protein 2	HLA-B35:02	0.3421	9		0.05532
LPTEKEVAL	MAP4	Microtubule-associated protein 4;Microtubule-associated protein	HLA-B35:02	0.0057	9		0.0553
HPGEADSVL	SUGP2	SURP and G-patch domain-containing protein 2	HLA-B35:02	0.0159	9		0.05523
IPDEKETRL	USP15	Ubiquitin carboxyl-terminal hydrolase 15	HLA-B35:02	0.0394	9		0.0552
LPAAGVGDMVM	RPL23	60S ribosomal protein L23	HLA-B35:02	0.3332	11		0.05507
LPDEEQEKL	LAS1L	Ribosomal biogenesis protein LAS1L	HLA-B35:02	0.0331	9		0.05491
LPEDFSDAL	DDX60	Probable ATP-dependent RNA helicase DDX60	HLA-B35:02	0.0087	9		0.05467
IPDPSTWNL	PSAT1	Phosphoserine aminotransferase	HLA-B35:02	0.0094	9		0.05464
FGSEFSPEL			HLA-B35:02	0.697	9		0.05446
MPDVDLNL	AHNAK	Neuroblast differentiation-associated protein AHNAK	HLA-B35:02	0.1243	8		0.05444
HPCTEEKAL	PER2	Period circadian protein homolog 2	HLA-B35:02	0.2949	9		0.05417
GPSTGDPVL	SPOCD1	SPOC domain-containing protein 1	HLA-B35:02	0.1388	9		0.054
IPTEDVSGL	BIRC2	Baculoviral IAP repeat-containing protein 2	HLA-B35:02	0.0286	9		0.05399
NAAHQEALM	NUF2	Kinetochore protein Nuf2	HLA-B35:02	0.4811	9	Wang et al., 2016	0.05324
LPDITKDEL	MRPL15	39S ribosomal protein L15, mitochondrial	HLA-B35:02	0.0327	9		0.05314
YPEGTPNGGSTTL			HLA-B35:02	0.1043	13		0.05301
EAHAEDSVM	SERBP1	Plasminogen activator inhibitor 1 RNA-binding protein	HLA-B35:02	0.2324	9		0.05275
FPIHLTDQL	DNAJC11	DnaJ homolog subfamily C member 11	HLA-B35:02	0.0044	9		0.05253
QPTDVESTL	SPECC1L;SPECC1L-ADORA2A	Cytospin-A	HLA-B35:02	0.0164	9		0.05243
TPEGNPPPTL	RIC8A	Synembryn-A	HLA-B35:02	0.2166	10		0.05238
LPFSFPDEL	MTMR14	Myotubularin-related protein 14	HLA-B35:02	0.0064	9		0.05231
HPCGEDCVQL	ZNFX1	NFX1-type zinc finger-containing protein 1	HLA-B35:02	0.8895	10		0.05211
FPSPVDAAF	HPX	Hemopexin	HLA-B35:02	0.002	9		0.0521
LPSPVDAAF	MMP11	Stromelysin-3	HLA-B35:02	0.0066	9		0.0521
LAEGREKTM	INTS10	Integrator complex subunit 10	HLA-B35:02	1.2502	9		0.05193
DPSIMDFAL	FOXN4	Forkhead box protein N4	HLA-B35:02	0.0429	9		0.05176
VPEEKAAEL	TBC1D23	TBC1 domain family member 23	HLA-B35:02	0.0328	9		0.0516
FPDHVDTQHLI	TTC8	Tetratricopeptide repeat protein 8	HLA-B35:02	0.3536	11		0.05113
HPESGEVTV	EP300	Histone acetyltransferase p300	HLA-B35:02	0.0315	9		0.0508
SPFKADIEM	FLNB	Filamin-B	HLA-B35:02	0.0099	9		0.0508
FPLTTESAM	RPL23A	60S ribosomal protein L23a	HLA-B35:02	0.0061	9		0.05075
VPDLVPGNF	FGA	Fibrinogen alpha chain;Fibrinopeptide A;Fibrinogen alpha chain	HLA-B35:02	0.1535	9		0.05062
APDGCPDHVL	NCDN	Neurochondrin	HLA-B35:02	0.2887	10		0.0503
MPAPHTSITM	WDR81	WD repeat-containing protein 81	HLA-B35:02	0.0078	10		0.05011
HPVSDHEATL	HLA-C;HLA-B	HLA class I histocompatibility antigen, Cw-6 alpha chain;HLA class I histocompatibility antigen, B-35 alpha chain;HLA class I histocompatibility antigen, B-53 alpha chain;HLA class I histocompatibility antigen, B-58 alpha chain;HLA class I histocompatibility antigen, B-78 alpha chain;HLA class I histocompatibility antigen, B-52 alpha chain;HLA class I histocompatibility antigen, B-51 alpha chain;…	HLA-B35:02	0.0527	10		0.04998
DPLVELQTL	CFAP46	Cilia- and flagella-associated protein 46	HLA-B35:02	0.0587	9		0.04992
LPEENYQVL	ARHGAP1	Rho GTPase-activating protein 1	HLA-B35:02	0.0079	9		0.04983
MPEQIVVQAL	STAG1;DKFZp781D1416	Cohesin subunit SA-1	HLA-B35:02	0.0699	10		0.0497
APSYGARPV	KRT18	Keratin, type I cytoskeletal 18	HLA-B35:02	0.687	9		0.04961
VPHLETDMM	AKAP8L	A-kinase anchor protein 8-like	HLA-B35:02	0.0647	9		0.0495
VPSLFPLGL	C9orf47	Uncharacterized protein C9orf47	HLA-B35:02	0.1175	9		0.04914
APAAAEPKL	SRC	Proto-oncogene tyrosine-protein kinase Src	HLA-B35:02	0.0941	9		0.04906
FPVSEARVL	ITGB3	Integrin beta;Integrin beta-3	HLA-B35:02	0.0039	9		0.04906
TPPPDDPRL	SNX15	Sorting nexin-15	HLA-B35:02	0.1749	9		0.0486
GPSENDPNL	ABL1	Tyrosine-protein kinase ABL1	HLA-B35:02	0.1662	9		0.04849
SPLSETEM	MAP4	Microtubule-associated protein 4;Microtubule-associated protein	HLA-B35:02	0.541	8		0.04847
TPFHEIMSL	BUB1B	Mitotic checkpoint serine/threonine-protein kinase BUB1 beta	HLA-B35:02	0.008	9		0.04847
FAAASREVL	C19orf60	Uncharacterized protein C19orf60	HLA-B35:02	0.1549	9		0.04831
SATADTSIF	MAP4	Microtubule-associated protein 4;Microtubule-associated protein	HLA-B35:02	0.8759	9		0.04825
LPMPTEPLL	RPAP1	RNA polymerase II-associated protein 1	HLA-B35:02	0.0068	9		0.04805
APSGGDPAF	SFTPC	Pulmonary surfactant-associated protein C	HLA-B35:02	0.06	9		0.04778
SPSPFCPEL	CCDC87	Coiled-coil domain-containing protein 87	HLA-B35:02	0.088	9		0.04753
YPYCDYEM	ITGB4	Integrin beta-4	HLA-B35:02	0.128	8		0.04717
DPNQDAEAL	ANXA6	Annexin;Annexin A6	HLA-B35:02	0.056	9		0.04713
LPDYYDTPL	PHLPP1	PH domain leucine-rich repeat-containing protein phosphatase 1	HLA-B35:02	0.0283	9		0.04704
LPDYYLVTV	SND1	Staphylococcal nuclease domain-containing protein 1	HLA-B35:02	0.0714	9		0.04696
FPEQNVPEAL	OAS3	2-5-oligoadenylate synthase 3	HLA-B35:02	0.0289	10		0.04676
EPMEKEFGL	GNL3	Guanine nucleotide-binding protein-like 3	HLA-B35:02	0.0477	9		0.0466
QALLDLHAL	FTL	Ferritin light chain	HLA-B35:02	0.3252	9		0.04656
SPIPMETEL	LIN54	Protein lin-54 homolog	HLA-B35:02	0.0099	9		0.04655
LPDNILQVL	NBEAL1	Neurobeachin-like protein 1	HLA-B35:02	0.007	9		0.04621
FPFDVAVKF	TRAPPC11	Trafficking protein particle complex subunit 11	HLA-B35:02	0.0036	9		0.04619
TANLEAQAL	LGALS3BP	Galectin-3-binding protein	HLA-B35:02	0.2328	9		0.04617
EVAEKINAF	APOB	Apolipoprotein B-100;Apolipoprotein B-48	HLA-B35:02	0.334	9		0.04613
EPERVASVL	SH3BP4	SH3 domain-binding protein 4	HLA-B35:02	0.0961	9		0.04611
FPDEETSEKF	NAIP	Baculoviral IAP repeat-containing protein 1	HLA-B35:02	0.0462	10		0.04602
TITGVDVSM	SNRPD1	Small nuclear ribonucleoprotein Sm D1	HLA-B35:02	0.6922	9		0.04596
LPGLDPVL	VKORC1		HLA-B35:02	0.5204	8	Bruggeman et al., 2018	0.04584
HPDVVSVIL	ANKFY1	Rabankyrin-5	HLA-B35:02	0.0051	9		0.04581
FPSPEESEA	ABR	Active breakpoint cluster region-related protein	HLA-B35:02	0.157	9		0.04577
MPSEDVVSL	VPS35	Vacuolar protein sorting-associated protein 35	HLA-B35:02	0.001	9		0.04569
LPEAQDYFL	CCDC15	Coiled-coil domain-containing protein 15	HLA-B35:02	0.0567	9	Bruggeman et al., 2018	0.04523
IPIAGESESL	FAM102B	Protein FAM102B	HLA-B35:02	0.1283	10		0.04518
IPETASVVAI	FCRLA	Fc receptor-like A	HLA-B35:02	0.4767	10		0.04512
MPFSAVDIL	HCFC1		HLA-B35:02	0.0036	9		0.04497
QPEAAGSVAM	PPP6R3	Serine/threonine-protein phosphatase 6 regulatory subunit 3	HLA-B35:02	0.2001	10		0.04494
FGMEQEYTL	GLUL	Glutamine synthetase	HLA-B35:02	0.3687	9		0.04476
NPISTVTEL	CCT4	T-complex protein 1 subunit delta	HLA-B35:02	0.0061	9		0.04465
LPSEESTAA	MED21	Mediator of RNA polymerase II transcription subunit 21	HLA-B35:02	0.1868	9		0.04444
VPDDILQLL	DPEP2;DPEP3	Dipeptidase;Dipeptidase 2;Dipeptidase 3	HLA-B35:02	0.012	9	Bruggeman et al., 2018;Da Silva et al., 2017;Djureinovic et al., 2016;Wang et al., 2016	0.04444
LPFLEASTL	PLCG1	1-phosphatidylinositol 4,5-bisphosphate phosphodiesterase gamma-1	HLA-B35:02	0.0086	9		0.04423
LPFHTSTEM	DHRS3	Short-chain dehydrogenase/reductase 3	HLA-B35:02	0.0097	9		0.04388
MPEILKTEL	CDCA5	Sororin	HLA-B35:02	0.0184	9	Wang et al., 2016	0.04388
SPSVDDLAL	CCNDBP1	Cyclin-D1-binding protein 1	HLA-B35:02	0.0339	9		0.04382
APDNVLLTL	SAGE1	Sarcoma antigen 1	HLA-B35:02	0.0338	9	CTDatabase;Da Silva et al., 2017;Djureinovic et al., 2016	0.04377
TAAMIDAVL	CAND1	Cullin-associated NEDD8-dissociated protein 1	HLA-B35:02	0.151	9		0.04362
EAMADLHTL	SFN	14-3-3 protein sigma	HLA-B35:02	0.0335	9		0.04351
HPEDSEYEA	USP16	Ubiquitin carboxyl-terminal hydrolase 16	HLA-B35:02	0.3969	9		0.04335
IPDDPLVL	CES4A	Carboxylic ester hydrolase;Carboxylesterase 4A	HLA-B35:02	0.11	8		0.04312
VPYEKGFAL	LTA4H	Leukotriene A-4 hydrolase	HLA-B35:02	0.0058	9		0.04311
MPLGSAVDIL	MCM3	DNA replication licensing factor MCM3	HLA-B35:02	0.1515	10		0.04284
YAPEGSPIL	FAHD1	Acylpyruvase FAHD1, mitochondrial	HLA-B35:02	0.1072	9	Bruggeman et al., 2018	0.04282
LPSPDPDIL	STIM2	Stromal interaction molecule 2	HLA-B35:02	0.0223	9		0.04278
LPDPFAKIV	SMURF1	E3 ubiquitin-protein ligase SMURF1	HLA-B35:02	0.0533	9		0.04263
EPGADFSL	HELZ2	Helicase with zinc finger domain 2	HLA-B35:02	0.8633	8		0.04255
FPNIVIKGSEL	PRPF8	Pre-mRNA-processing-splicing factor 8	HLA-B35:02	0.5141	11		0.0424
HPVHPDIKL	PIAS1	E3 SUMO-protein ligase PIAS1	HLA-B35:02	0.0157	9		0.04235
FPFPVTVSL	SLC35E1	Solute carrier family 35 member E1	HLA-B35:02	0.0011	9		0.04176
YPLDGEKIL	ACTR10	Actin-related protein 10	HLA-B35:02	0.0053	9		0.04173
SPSYPEISF	COMMD3	COMM domain-containing protein 3	HLA-B35:02	0.0687	9		0.04169
TVSEDTASL	FAM35A	Protein FAM35A	HLA-B35:02	0.3325	9		0.04155
IPAGETSL	OSMR	Oncostatin-M-specific receptor subunit beta	HLA-B35:02	0.2556	8		0.04122
LPLISVAL	ECHDC1	Ethylmalonyl-CoA decarboxylase	HLA-B35:02	0.2457	8		0.0411
SPSFGDPQL	SVIL	Supervillin	HLA-B35:02	0.0409	9		0.04094
FPEQIAEKL	LRRC42	Leucine-rich repeat-containing protein 42	HLA-B35:02	0.0067	9		0.04087
FPDRIMNTF	TUBB4A;TUBB6	Tubulin beta-4A chain;Tubulin beta-6 chain	HLA-B35:02	0.0066	9		0.0408
YPDRIMNTF	TUBB;TUBB3;TUBB4B;TUBB2B;TUBB2A	Tubulin beta chain;Tubulin beta-4B chain;Tubulin beta-2B chain;Tubulin beta-2A chain;Tubulin beta-3 chain	HLA-B35:02	0.0066	9		0.0408
QPDPDAIKM	CELF2	CUGBP Elav-like family member 2	HLA-B35:02	0.023	9		0.04079
HADSIDLEL	CAMTA1	Calmodulin-binding transcription activator 1	HLA-B35:02	0.0848	9		0.04035
LPDAMNIEL	NEB	Nebulin	HLA-B35:02	0.0055	9		0.0403
SAHPDILSL	TEP1	Telomerase protein component 1	HLA-B35:02	0.1626	9		0.0402
EVDPNIQAV	KRT8	Keratin, type II cytoskeletal 8	HLA-B35:02	0.2502	9		0.04012
TAAPVQETL	CD40	Tumor necrosis factor receptor superfamily member 5	HLA-B35:02	0.0867	9		0.03988
VPVSRDFTL	INPP5B	Type II inositol 1,4,5-trisphosphate 5-phosphatase	HLA-B35:02	0.0188	9		0.03969
HPDYSFGEL	PBRM1	Protein polybromo-1	HLA-B35:02	0.0213	9		0.03968
VAHEDYMEL	THOC5	THO complex subunit 5 homolog	HLA-B35:02	0.2123	9		0.03967
LPDVVLQEL	HPS3	Hermansky-Pudlak syndrome 3 protein	HLA-B35:02	0.0156	9		0.03924
EADGAAPQL	CDT1	DNA replication factor Cdt1	HLA-B35:02	0.0739	9		0.03919
YPALVVEKM	PRKDC	DNA-dependent protein kinase catalytic subunit	HLA-B35:02	0.0064	9		0.0391
YPEELDQLL	TRIP12	E3 ubiquitin-protein ligase TRIP12	HLA-B35:02	0.0068	9		0.03909
IPMDDDFQL	HIF1A	Hypoxia-inducible factor 1-alpha	HLA-B35:02	0.0063	9		0.03892
EPAVYEPSL	MAP3K8	Mitogen-activated protein kinase kinase kinase 8	HLA-B35:02	0.0351	9		0.03887
LPSPIVQDVL			HLA-B35:02	0.0939	10		0.03874
EPMEQEPAL	HDAC5	Histone deacetylase 5	HLA-B35:02	0.0074	9		0.0387
LPTENVDKM	TCAF1	TRPM8 channel-associated factor 1	HLA-B35:02	0.0163	9		0.03863
SPASDTYIVF	NACA	Nascent polypeptide-associated complex subunit alpha;Nascent polypeptide-associated complex subunit alpha, muscle-specific form	HLA-B35:02	0.1936	10		0.03859
FPDGDQEL	RBM23	Probable RNA-binding protein 23	HLA-B35:02	0.0692	8		0.03836
YPAGFMDVI	RPS4Y1;RPS4X	40S ribosomal protein S4, X isoform;40S ribosomal protein S4, Y isoform 1	HLA-B35:02	0.0098	9		0.03834
HPSEGGQVL	PACS2	Phosphofurin acidic cluster sorting protein 2	HLA-B35:02	0.0051	9		0.03831
HPYPHNHYM	CITED2	Cbp/p300-interacting transactivator 2	HLA-B35:02	0.0027	9		0.03819
LPVQPEVAL	SRRM2	Serine/arginine repetitive matrix protein 2	HLA-B35:02	0.0036	9		0.03799
EAGPGDPLL	CDC37	Hsp90 co-chaperone Cdc37;Hsp90 co-chaperone Cdc37, N-terminally processed	HLA-B35:02	0.3583	9		0.03788
[truncated: 1,649 more rows]
